# Supplementary material for: Repurposing Anti-Dengue Compounds against Monkeypox Virus Targeting Core Cysteine Protease
Source: MDPI journal article supplement (doi:10.3390/biomedicines11072025), 2023-07-18
Supplement: s1 [file s1]

**Supplementary Table S1.** The binding energies of the 1467 anti-dengue compounds against the clusters of the MPXV cysteine proteinase.

| Compounds | Binding energy (kcal/mol) from docking with Cluster-1 | Compounds | Binding energy (kcal/mol) from docking with Cluster-2 | Compounds | Binding energy (kcal/mol) from docking with Cluster-3 |
|-----------|-------------------------------------------------------|-----------|-------------------------------------------------------|-----------|-------------------------------------------------------|
| drug1176  | -10.5                                                 | drug562   | -10.7                                                 | drug1185  | -10.9                                                 |
| drug1023  | -10.2                                                 | drug956   | -10.4                                                 | drug1099  | -10.8                                                 |
| drug1272  | -10                                                   | drug1315  | -10.2                                                 | drug1186  | -10.8                                                 |
| drug1309  | -10                                                   | drug935   | -10.1                                                 | drug1225  | -10.8                                                 |
| drug1084  | -9.9                                                  | drug1489  | -10.1                                                 | drug1273  | -10.8                                                 |
| drug1125  | -9.8                                                  | drug678   | -10                                                   | drug1187  | -10.7                                                 |
| drug367   | -9.7                                                  | drug1023  | -9.9                                                  | drug1272  | -10.7                                                 |
| drug1005  | -9.7                                                  | drug269   | -9.8                                                  | drug1006  | -10.6                                                 |
| drug260   | -9.6                                                  | drug1084  | -9.8                                                  | drug821   | -10.4                                                 |
| drug261   | -9.6                                                  | drug234   | -9.7                                                  | drug995   | -10.4                                                 |
| drug404   | -9.6                                                  | drug324   | -9.7                                                  | drug1270  | -10.4                                                 |
| drug493   | -9.5                                                  | drug438   | -9.7                                                  | drug1441  | -10.4                                                 |
| drug694   | -9.5                                                  | drug489   | -9.7                                                  | drug1471  | -10.4                                                 |
| drug1018  | -9.5                                                  | drug152   | -9.6                                                  | drug1155  | -10.3                                                 |
| drug1154  | -9.5                                                  | drug410   | -9.6                                                  | drug1100  | -10.1                                                 |
| drug1186  | -9.5                                                  | drug441   | -9.6                                                  | drug1269  | -10.1                                                 |
| drug1187  | -9.5                                                  | drug760   | -9.5                                                  | drug1271  | -10.1                                                 |
| drug1188  | -9.5                                                  | drug1308  | -9.5                                                  | drug733   | -10                                                   |
| drug1269  | -9.5                                                  | drug1335  | -9.5                                                  | drug994   | -10                                                   |
| drug1273  | -9.5                                                  | drug1441  | -9.5                                                  | drug1018  | -10                                                   |
| drug1441  | -9.5                                                  | drug57    | -9.4                                                  | drug1154  | -10                                                   |
| drug1006  | -9.4                                                  | drug421   | -9.4                                                  | drug1184  | -10                                                   |
| drug1099  | -9.4                                                  | drug464   | -9.4                                                  | drug1268  | -10                                                   |
| drug1183  | -9.4                                                  | drug484   | -9.4                                                  | drug1309  | -10                                                   |
| drug416   | -9.3                                                  | drug505   | -9.4                                                  | drug404   | -9.9                                                  |
| drug733   | -9.3                                                  | drug536   | -9.4                                                  | drug1183  | -9.8                                                  |
| drug748   | -9.3                                                  | drug733   | -9.4                                                  | drug42    | -9.7                                                  |
| drug1100  | -9.3                                                  | drug817   | -9.4                                                  | drug622   | -9.7                                                  |
| drug1155  | -9.3                                                  | drug874   | -9.4                                                  | drug1005  | -9.7                                                  |
| drug1225  | -9.3                                                  | drug1063  | -9.4                                                  | drug1176  | -9.7                                                  |
| drug1268  | -9.3                                                  | drug1100  | -9.4                                                  | drug1023  | -9.5                                                  |
| drug1271  | -9.3                                                  | drug1187  | -9.4                                                  | drug1060  | -9.5                                                  |
| drug1471  | -9.3                                                  | drug1225  | -9.4                                                  | drug1150  | -9.5                                                  |
| drug678   | -9.2                                                  | drug1268  | -9.4                                                  | drug1442  | -9.5                                                  |
| drug731   | -9.2                                                  | drug1271  | -9.4                                                  | drug1467  | -9.5                                                  |
| drug1076  | -9.2                                                  | drug1272  | -9.4                                                  | drug261   | -9.4                                                  |
| drug484   | -9.1                                                  | drug1273  | -9.4                                                  | drug611   | -9.4                                                  |
| drug533   | -9.1                                                  | drug323   | -9.3                                                  | drug874   | -9.4                                                  |
| drug562   | -9.1                                                  | drug368   | -9.3                                                  | drug1125  | -9.4                                                  |
| drug730   | -9.1                                                  | drug380   | -9.3                                                  | drug1189  | -9.4                                                  |

|          |      |          |      |          |      |
|----------|------|----------|------|----------|------|
| drug817  | -9.1 | drug416  | -9.3 | drug1274 | -9.4 |
| drug874  | -9.1 | drug463  | -9.3 | drug1489 | -9.4 |
| drug1052 | -9.1 | drug465  | -9.3 | drug484  | -9.3 |
| drug1184 | -9.1 | drug494  | -9.3 | drug581  | -9.3 |
| drug1185 | -9.1 | drug508  | -9.3 | drug646  | -9.3 |
| drug1196 | -9.1 | drug653  | -9.3 | drug997  | -9.3 |
| drug1410 | -9.1 | drug691  | -9.3 | drug1069 | -9.3 |
| drug1421 | -9.1 | drug936  | -9.3 | drug1233 | -9.3 |
| drug235  | -9   | drug1006 | -9.3 | drug417  | -9.2 |
| drug443  | -9   | drug1028 | -9.3 | drug493  | -9.2 |
| drug466  | -9   | drug1029 | -9.3 | drug508  | -9.2 |
| drug508  | -9   | drug1069 | -9.3 | drug562  | -9.2 |
| drug646  | -9   | drug1121 | -9.3 | drug648  | -9.2 |
| drug695  | -9   | drug1185 | -9.3 | drug678  | -9.2 |
| drug775  | -9   | drug1249 | -9.3 | drug694  | -9.2 |
| drug1195 | -9   | drug1258 | -9.3 | drug898  | -9.2 |
| drug1258 | -9   | drug1468 | -9.3 | drug956  | -9.2 |
| drug1274 | -9   | drug1496 | -9.3 | drug1188 | -9.2 |
| drug1339 | -9   | drug219  | -9.2 | drug414  | -9.1 |
| drug24   | -8.9 | drug233  | -9.2 | drug443  | -9.1 |
| drug139  | -8.9 | drug347  | -9.2 | drug479  | -9.1 |
| drug204  | -8.9 | drug350  | -9.2 | drug482  | -9.1 |
| drug414  | -8.9 | drug392  | -9.2 | drug834  | -9.1 |
| drug618  | -8.9 | drug409  | -9.2 | drug852  | -9.1 |
| drug855  | -8.9 | drug429  | -9.2 | drug924  | -9.1 |
| drug1069 | -8.9 | drug440  | -9.2 | drug986  | -9.1 |
| drug1121 | -8.9 | drug443  | -9.2 | drug1121 | -9.1 |
| drug1270 | -8.9 | drug543  | -9.2 | drug1241 | -9.1 |
| drug126  | -8.8 | drug546  | -9.2 | drug1315 | -9.1 |
| drug199  | -8.8 | drug640  | -9.2 | drug1333 | -9.1 |
| drug289  | -8.8 | drug864  | -9.2 | drug1381 | -9.1 |
| drug421  | -8.8 | drug261  | -9.1 | drug1420 | -9.1 |
| drug430  | -8.8 | drug288  | -9.1 | drug112  | -9   |
| drug444  | -8.8 | drug332  | -9.1 | drug270  | -9   |
| drug463  | -8.8 | drug363  | -9.1 | drug625  | -9   |
| drug494  | -8.8 | drug411  | -9.1 | drug1084 | -9   |
| drug527  | -8.8 | drug877  | -9.1 | drug1195 | -9   |
| drug581  | -8.8 | drug882  | -9.1 | drug1310 | -9   |
| drug692  | -8.8 | drug919  | -9.1 | drug57   | -8.9 |
| drug704  | -8.8 | drug1113 | -9.1 | drug173  | -8.9 |
| drug716  | -8.8 | drug1154 | -9.1 | drug320  | -8.9 |
| drug935  | -8.8 | drug1166 | -9.1 | drug331  | -8.9 |
| drug1166 | -8.8 | drug1176 | -9.1 | drug391  | -8.9 |
| drug1194 | -8.8 | drug1186 | -9.1 | drug444  | -8.9 |
| drug1263 | -8.8 | drug1288 | -9.1 | drug465  | -8.9 |
| drug1307 | -8.8 | drug1490 | -9.1 | drug692  | -8.9 |
| drug1408 | -8.8 | drug21   | -9   | drug855  | -8.9 |

|          |      |          |      |          |      |
|----------|------|----------|------|----------|------|
| drug1411 | -8.8 | drug42   | -9   | drug883  | -8.9 |
| drug1428 | -8.8 | drug50   | -9   | drug1129 | -8.9 |
| drug10   | -8.7 | drug95   | -9   | drug1232 | -8.9 |
| drug80   | -8.7 | drug112  | -9   | drug1421 | -8.9 |
| drug110  | -8.7 | drug170  | -9   | drug1428 | -8.9 |
| drug112  | -8.7 | drug250  | -9   | drug1493 | -8.9 |
| drug191  | -8.7 | drug342  | -9   | drug26   | -8.8 |
| drug340  | -8.7 | drug375  | -9   | drug44   | -8.8 |
| drug352  | -8.7 | drug379  | -9   | drug260  | -8.8 |
| drug380  | -8.7 | drug391  | -9   | drug343  | -8.8 |
| drug464  | -8.7 | drug493  | -9   | drug352  | -8.8 |
| drug465  | -8.7 | drug495  | -9   | drug446  | -8.8 |
| drug513  | -8.7 | drug532  | -9   | drug460  | -8.8 |
| drug653  | -8.7 | drug615  | -9   | drug546  | -8.8 |
| drug735  | -8.7 | drug624  | -9   | drug624  | -8.8 |
| drug776  | -8.7 | drug652  | -9   | drug730  | -8.8 |
| drug818  | -8.7 | drug694  | -9   | drug818  | -8.8 |
| drug856  | -8.7 | drug775  | -9   | drug820  | -8.8 |
| drug882  | -8.7 | drug867  | -9   | drug928  | -8.8 |
| drug904  | -8.7 | drug978  | -9   | drug935  | -8.8 |
| drug918  | -8.7 | drug998  | -9   | drug987  | -8.8 |
| drug936  | -8.7 | drug1093 | -9   | drug989  | -8.8 |
| drug1113 | -8.7 | drug1117 | -9   | drug1052 | -8.8 |
| drug1150 | -8.7 | drug1129 | -9   | drug1182 | -8.8 |
| drug1189 | -8.7 | drug1269 | -9   | drug1328 | -8.8 |
| drug1233 | -8.7 | drug1307 | -9   | drug1410 | -8.8 |
| drug1315 | -8.7 | drug1428 | -9   | drug1435 | -8.8 |
| drug1381 | -8.7 | drug1454 | -9   | drug1444 | -8.8 |
| drug1420 | -8.7 | drug193  | -8.9 | drug1490 | -8.8 |
| drug1427 | -8.7 | drug270  | -8.9 | drug10   | -8.7 |
| drug1489 | -8.7 | drug275  | -8.9 | drug24   | -8.7 |
| drug324  | -8.6 | drug320  | -8.9 | drug169  | -8.7 |
| drug345  | -8.6 | drug339  | -8.9 | drug193  | -8.7 |
| drug350  | -8.6 | drug344  | -8.9 | drug235  | -8.7 |
| drug351  | -8.6 | drug362  | -8.9 | drug403  | -8.7 |
| drug392  | -8.6 | drug462  | -8.9 | drug428  | -8.7 |
| drug417  | -8.6 | drug496  | -8.9 | drug450  | -8.7 |
| drug476  | -8.6 | drug512  | -8.9 | drug466  | -8.7 |
| drug523  | -8.6 | drug679  | -8.9 | drug485  | -8.7 |
| drug543  | -8.6 | drug762  | -8.9 | drug512  | -8.7 |
| drug620  | -8.6 | drug948  | -8.9 | drug533  | -8.7 |
| drug734  | -8.6 | drug989  | -8.9 | drug578  | -8.7 |
| drug766  | -8.6 | drug1060 | -8.9 | drug716  | -8.7 |
| drug770  | -8.6 | drug1073 | -8.9 | drug723  | -8.7 |
| drug851  | -8.6 | drug1079 | -8.9 | drug736  | -8.7 |
| drug873  | -8.6 | drug1099 | -8.9 | drug830  | -8.7 |
| drug883  | -8.6 | drug1155 | -8.9 | drug864  | -8.7 |

|          |      |          |      |          |      |
|----------|------|----------|------|----------|------|
| drug986  | -8.6 | drug1156 | -8.9 | drug961  | -8.7 |
| drug994  | -8.6 | drug1184 | -8.9 | drug977  | -8.7 |
| drug997  | -8.6 | drug1330 | -8.9 | drug988  | -8.7 |
| drug1053 | -8.6 | drug1460 | -8.9 | drug1007 | -8.7 |
| drug1079 | -8.6 | drug1488 | -8.9 | drug1043 | -8.7 |
| drug1095 | -8.6 | drug55   | -8.8 | drug1079 | -8.7 |
| drug1208 | -8.6 | drug68   | -8.8 | drug1204 | -8.7 |
| drug1351 | -8.6 | drug81   | -8.8 | drug1216 | -8.7 |
| drug1370 | -8.6 | drug118  | -8.8 | drug1370 | -8.7 |
| drug1406 | -8.6 | drug301  | -8.8 | drug1371 | -8.7 |
| drug1415 | -8.6 | drug309  | -8.8 | drug1425 | -8.7 |
| drug1442 | -8.6 | drug334  | -8.8 | drug1468 | -8.7 |
| drug1467 | -8.6 | drug369  | -8.8 | drug1474 | -8.7 |
| drug42   | -8.5 | drug398  | -8.8 | drug1    | -8.6 |
| drug57   | -8.5 | drug430  | -8.8 | drug33   | -8.6 |
| drug173  | -8.5 | drug444  | -8.8 | drug103  | -8.6 |
| drug188  | -8.5 | drug498  | -8.8 | drug110  | -8.6 |
| drug219  | -8.5 | drug499  | -8.8 | drug118  | -8.6 |
| drug343  | -8.5 | drug507  | -8.8 | drug152  | -8.6 |
| drug429  | -8.5 | drug593  | -8.8 | drug209  | -8.6 |
| drug441  | -8.5 | drug661  | -8.8 | drug220  | -8.6 |
| drug511  | -8.5 | drug744  | -8.8 | drug324  | -8.6 |
| drug546  | -8.5 | drug757  | -8.8 | drug340  | -8.6 |
| drug625  | -8.5 | drug924  | -8.8 | drug345  | -8.6 |
| drug638  | -8.5 | drug1188 | -8.8 | drug350  | -8.6 |
| drug741  | -8.5 | drug1202 | -8.8 | drug392  | -8.6 |
| drug749  | -8.5 | drug1240 | -8.8 | drug393  | -8.6 |
| drug760  | -8.5 | drug1242 | -8.8 | drug410  | -8.6 |
| drug852  | -8.5 | drug1279 | -8.8 | drug429  | -8.6 |
| drug928  | -8.5 | drug1343 | -8.8 | drug437  | -8.6 |
| drug937  | -8.5 | drug1347 | -8.8 | drug463  | -8.6 |
| drug1182 | -8.5 | drug1372 | -8.8 | drug464  | -8.6 |
| drug1193 | -8.5 | drug1420 | -8.8 | drug469  | -8.6 |
| drug1240 | -8.5 | drug1434 | -8.8 | drug489  | -8.6 |
| drug1294 | -8.5 | drug1467 | -8.8 | drug494  | -8.6 |
| drug1328 | -8.5 | drug1471 | -8.8 | drug506  | -8.6 |
| drug1343 | -8.5 | drug1491 | -8.8 | drug510  | -8.6 |
| drug1422 | -8.5 | drug44   | -8.7 | drug517  | -8.6 |
| drug1435 | -8.5 | drug52   | -8.7 | drug618  | -8.6 |
| drug1456 | -8.5 | drug79   | -8.7 | drug632  | -8.6 |
| drug1460 | -8.5 | drug109  | -8.7 | drug651  | -8.6 |
| drug1468 | -8.5 | drug171  | -8.7 | drug770  | -8.6 |
| drug26   | -8.4 | drug185  | -8.7 | drug776  | -8.6 |
| drug79   | -8.4 | drug385  | -8.7 | drug937  | -8.6 |
| drug135  | -8.4 | drug476  | -8.7 | drug1051 | -8.6 |
| drug234  | -8.4 | drug486  | -8.7 | drug1110 | -8.6 |
| drug347  | -8.4 | drug513  | -8.7 | drug1166 | -8.6 |

|          |      |          |      |          |      |
|----------|------|----------|------|----------|------|
| drug379  | -8.4 | drug520  | -8.7 | drug1208 | -8.6 |
| drug381  | -8.4 | drug578  | -8.7 | drug1248 | -8.6 |
| drug410  | -8.4 | drug584  | -8.7 | drug1280 | -8.6 |
| drug449  | -8.4 | drug600  | -8.7 | drug1340 | -8.6 |
| drug460  | -8.4 | drug605  | -8.7 | drug1408 | -8.6 |
| drug461  | -8.4 | drug608  | -8.7 | drug1411 | -8.6 |
| drug502  | -8.4 | drug609  | -8.7 | drug1431 | -8.6 |
| drug512  | -8.4 | drug641  | -8.7 | drug121  | -8.5 |
| drug600  | -8.4 | drug692  | -8.7 | drug127  | -8.5 |
| drug611  | -8.4 | drug721  | -8.7 | drug138  | -8.5 |
| drug621  | -8.4 | drug793  | -8.7 | drug191  | -8.5 |
| drug652  | -8.4 | drug818  | -8.7 | drug212  | -8.5 |
| drug714  | -8.4 | drug847  | -8.7 | drug347  | -8.5 |
| drug754  | -8.4 | drug894  | -8.7 | drug353  | -8.5 |
| drug771  | -8.4 | drug906  | -8.7 | drug367  | -8.5 |
| drug820  | -8.4 | drug937  | -8.7 | drug379  | -8.5 |
| drug892  | -8.4 | drug1076 | -8.7 | drug416  | -8.5 |
| drug898  | -8.4 | drug1110 | -8.7 | drug421  | -8.5 |
| drug977  | -8.4 | drug1144 | -8.7 | drug430  | -8.5 |
| drug1092 | -8.4 | drug1160 | -8.7 | drug447  | -8.5 |
| drug1098 | -8.4 | drug1183 | -8.7 | drug487  | -8.5 |
| drug1110 | -8.4 | drug1241 | -8.7 | drug513  | -8.5 |
| drug1136 | -8.4 | drug1256 | -8.7 | drug527  | -8.5 |
| drug1207 | -8.4 | drug1263 | -8.7 | drug557  | -8.5 |
| drug1310 | -8.4 | drug1270 | -8.7 | drug626  | -8.5 |
| drug1313 | -8.4 | drug1289 | -8.7 | drug627  | -8.5 |
| drug1340 | -8.4 | drug1295 | -8.7 | drug639  | -8.5 |
| drug1379 | -8.4 | drug1325 | -8.7 | drug668  | -8.5 |
| drug1448 | -8.4 | drug1328 | -8.7 | drug695  | -8.5 |
| drug1454 | -8.4 | drug1331 | -8.7 | drug703  | -8.5 |
| drug1466 | -8.4 | drug22   | -8.6 | drug720  | -8.5 |
| drug1478 | -8.4 | drug77   | -8.6 | drug734  | -8.5 |
| drug1486 | -8.4 | drug114  | -8.6 | drug740  | -8.5 |
| drug1493 | -8.4 | drug121  | -8.6 | drug749  | -8.5 |
| drug53   | -8.3 | drug166  | -8.6 | drug754  | -8.5 |
| drug117  | -8.3 | drug173  | -8.6 | drug760  | -8.5 |
| drug134  | -8.3 | drug174  | -8.6 | drug878  | -8.5 |
| drug152  | -8.3 | drug207  | -8.6 | drug882  | -8.5 |
| drug193  | -8.3 | drug212  | -8.6 | drug891  | -8.5 |
| drug209  | -8.3 | drug220  | -8.6 | drug904  | -8.5 |
| drug266  | -8.3 | drug276  | -8.6 | drug978  | -8.5 |
| drug320  | -8.3 | drug327  | -8.6 | drug1097 | -8.5 |
| drug323  | -8.3 | drug340  | -8.6 | drug1145 | -8.5 |
| drug339  | -8.3 | drug420  | -8.6 | drug1160 | -8.5 |
| drug365  | -8.3 | drug437  | -8.6 | drug1258 | -8.5 |
| drug400  | -8.3 | drug563  | -8.6 | drug1263 | -8.5 |
| drug403  | -8.3 | drug583  | -8.6 | drug1307 | -8.5 |

|          |      |          |      |          |      |
|----------|------|----------|------|----------|------|
| drug415  | -8.3 | drug592  | -8.6 | drug1308 | -8.5 |
| drug474  | -8.3 | drug606  | -8.6 | drug1313 | -8.5 |
| drug496  | -8.3 | drug616  | -8.6 | drug1335 | -8.5 |
| drug501  | -8.3 | drug627  | -8.6 | drug1399 | -8.5 |
| drug624  | -8.3 | drug662  | -8.6 | drug1412 | -8.5 |
| drug626  | -8.3 | drug687  | -8.6 | drug1460 | -8.5 |
| drug627  | -8.3 | drug730  | -8.6 | drug1496 | -8.5 |
| drug648  | -8.3 | drug771  | -8.6 | drug155  | -8.4 |
| drug674  | -8.3 | drug799  | -8.6 | drug185  | -8.4 |
| drug679  | -8.3 | drug852  | -8.6 | drug243  | -8.4 |
| drug709  | -8.3 | drug856  | -8.6 | drug266  | -8.4 |
| drug713  | -8.3 | drug987  | -8.6 | drug339  | -8.4 |
| drug779  | -8.3 | drug1061 | -8.6 | drug409  | -8.4 |
| drug837  | -8.3 | drug1062 | -8.6 | drug415  | -8.4 |
| drug1007 | -8.3 | drug1141 | -8.6 | drug440  | -8.4 |
| drug1029 | -8.3 | drug1204 | -8.6 | drug448  | -8.4 |
| drug1038 | -8.3 | drug1207 | -8.6 | drug505  | -8.4 |
| drug1077 | -8.3 | drug1230 | -8.6 | drug523  | -8.4 |
| drug1116 | -8.3 | drug1233 | -8.6 | drug543  | -8.4 |
| drug1168 | -8.3 | drug1239 | -8.6 | drug580  | -8.4 |
| drug1222 | -8.3 | drug1262 | -8.6 | drug614  | -8.4 |
| drug1232 | -8.3 | drug1287 | -8.6 | drug638  | -8.4 |
| drug1308 | -8.3 | drug1340 | -8.6 | drug660  | -8.4 |
| drug1323 | -8.3 | drug1356 | -8.6 | drug709  | -8.4 |
| drug1336 | -8.3 | drug1404 | -8.6 | drug732  | -8.4 |
| drug1357 | -8.3 | drug1435 | -8.6 | drug777  | -8.4 |
| drug1394 | -8.3 | drug58   | -8.5 | drug873  | -8.4 |
| drug1412 | -8.3 | drug59   | -8.5 | drug936  | -8.4 |
| drug1497 | -8.3 | drug117  | -8.5 | drug971  | -8.4 |
| drug21   | -8.2 | drug172  | -8.5 | drug1092 | -8.4 |
| drug27   | -8.2 | drug188  | -8.5 | drug1098 | -8.4 |
| drug52   | -8.2 | drug189  | -8.5 | drug1101 | -8.4 |
| drug166  | -8.2 | drug210  | -8.5 | drug1102 | -8.4 |
| drug267  | -8.2 | drug230  | -8.5 | drug1111 | -8.4 |
| drug309  | -8.2 | drug235  | -8.5 | drug1113 | -8.4 |
| drug313  | -8.2 | drug266  | -8.5 | drug1194 | -8.4 |
| drug353  | -8.2 | drug289  | -8.5 | drug1218 | -8.4 |
| drug369  | -8.2 | drug313  | -8.5 | drug1261 | -8.4 |
| drug388  | -8.2 | drug333  | -8.5 | drug1321 | -8.4 |
| drug409  | -8.2 | drug345  | -8.5 | drug1379 | -8.4 |
| drug411  | -8.2 | drug352  | -8.5 | drug1430 | -8.4 |
| drug447  | -8.2 | drug407  | -8.5 | drug1500 | -8.4 |
| drug482  | -8.2 | drug458  | -8.5 | drug48   | -8.3 |
| drug485  | -8.2 | drug511  | -8.5 | drug50   | -8.3 |
| drug487  | -8.2 | drug533  | -8.5 | drug147  | -8.3 |
| drug506  | -8.2 | drug588  | -8.5 | drug164  | -8.3 |
| drug507  | -8.2 | drug622  | -8.5 | drug171  | -8.3 |

|          |      |          |      |          |      |
|----------|------|----------|------|----------|------|
| drug520  | -8.2 | drug625  | -8.5 | drug188  | -8.3 |
| drug556  | -8.2 | drug710  | -8.5 | drug192  | -8.3 |
| drug578  | -8.2 | drug749  | -8.5 | drug201  | -8.3 |
| drug632  | -8.2 | drug754  | -8.5 | drug204  | -8.3 |
| drug676  | -8.2 | drug768  | -8.5 | drug219  | -8.3 |
| drug691  | -8.2 | drug830  | -8.5 | drug234  | -8.3 |
| drug821  | -8.2 | drug844  | -8.5 | drug380  | -8.3 |
| drug829  | -8.2 | drug846  | -8.5 | drug407  | -8.3 |
| drug907  | -8.2 | drug866  | -8.5 | drug411  | -8.3 |
| drug909  | -8.2 | drug868  | -8.5 | drug456  | -8.3 |
| drug948  | -8.2 | drug870  | -8.5 | drug486  | -8.3 |
| drug989  | -8.2 | drug881  | -8.5 | drug488  | -8.3 |
| drug1012 | -8.2 | drug910  | -8.5 | drug584  | -8.3 |
| drug1074 | -8.2 | drug971  | -8.5 | drug620  | -8.3 |
| drug1082 | -8.2 | drug974  | -8.5 | drug640  | -8.3 |
| drug1097 | -8.2 | drug976  | -8.5 | drug653  | -8.3 |
| drug1114 | -8.2 | drug977  | -8.5 | drug679  | -8.3 |
| drug1153 | -8.2 | drug1039 | -8.5 | drug704  | -8.3 |
| drug1249 | -8.2 | drug1168 | -8.5 | drug731  | -8.3 |
| drug1266 | -8.2 | drug1216 | -8.5 | drug738  | -8.3 |
| drug1333 | -8.2 | drug1253 | -8.5 | drug779  | -8.3 |
| drug1359 | -8.2 | drug1275 | -8.5 | drug814  | -8.3 |
| drug1367 | -8.2 | drug1276 | -8.5 | drug906  | -8.3 |
| drug1384 | -8.2 | drug1283 | -8.5 | drug910  | -8.3 |
| drug1413 | -8.2 | drug1291 | -8.5 | drug926  | -8.3 |
| drug1437 | -8.2 | drug1348 | -8.5 | drug1029 | -8.3 |
| drug1439 | -8.2 | drug1    | -8.4 | drug1063 | -8.3 |
| drug1496 | -8.2 | drug54   | -8.4 | drug1168 | -8.3 |
| drug1    | -8.1 | drug69   | -8.4 | drug1178 | -8.3 |
| drug54   | -8.1 | drug126  | -8.4 | drug1196 | -8.3 |
| drug68   | -8.1 | drug164  | -8.4 | drug1215 | -8.3 |
| drug127  | -8.1 | drug209  | -8.4 | drug1230 | -8.3 |
| drug170  | -8.1 | drug282  | -8.4 | drug1288 | -8.3 |
| drug192  | -8.1 | drug353  | -8.4 | drug1294 | -8.3 |
| drug201  | -8.1 | drug376  | -8.4 | drug1345 | -8.3 |
| drug233  | -8.1 | drug381  | -8.4 | drug1357 | -8.3 |
| drug269  | -8.1 | drug386  | -8.4 | drug1469 | -8.3 |
| drug333  | -8.1 | drug404  | -8.4 | drug1475 | -8.3 |
| drug366  | -8.1 | drug405  | -8.4 | drug80   | -8.2 |
| drug391  | -8.1 | drug497  | -8.4 | drug81   | -8.2 |
| drug428  | -8.1 | drug523  | -8.4 | drug172  | -8.2 |
| drug446  | -8.1 | drug551  | -8.4 | drug313  | -8.2 |
| drug448  | -8.1 | drug585  | -8.4 | drug319  | -8.2 |
| drug450  | -8.1 | drug586  | -8.4 | drug323  | -8.2 |
| drug451  | -8.1 | drug618  | -8.4 | drug351  | -8.2 |
| drug579  | -8.1 | drug643  | -8.4 | drug373  | -8.2 |
| drug582  | -8.1 | drug703  | -8.4 | drug381  | -8.2 |

|          |      |          |      |          |      |
|----------|------|----------|------|----------|------|
| drug586  | -8.1 | drug704  | -8.4 | drug385  | -8.2 |
| drug619  | -8.1 | drug714  | -8.4 | drug386  | -8.2 |
| drug634  | -8.1 | drug726  | -8.4 | drug438  | -8.2 |
| drug639  | -8.1 | drug732  | -8.4 | drug441  | -8.2 |
| drug651  | -8.1 | drug770  | -8.4 | drug451  | -8.2 |
| drug675  | -8.1 | drug779  | -8.4 | drug497  | -8.2 |
| drug705  | -8.1 | drug829  | -8.4 | drug500  | -8.2 |
| drug721  | -8.1 | drug848  | -8.4 | drug501  | -8.2 |
| drug723  | -8.1 | drug912  | -8.4 | drug502  | -8.2 |
| drug736  | -8.1 | drug920  | -8.4 | drug520  | -8.2 |
| drug767  | -8.1 | drug939  | -8.4 | drug551  | -8.2 |
| drug774  | -8.1 | drug940  | -8.4 | drug600  | -8.2 |
| drug836  | -8.1 | drug945  | -8.4 | drug608  | -8.2 |
| drug871  | -8.1 | drug965  | -8.4 | drug615  | -8.2 |
| drug877  | -8.1 | drug972  | -8.4 | drug617  | -8.2 |
| drug905  | -8.1 | drug973  | -8.4 | drug631  | -8.2 |
| drug939  | -8.1 | drug980  | -8.4 | drug656  | -8.2 |
| drug963  | -8.1 | drug995  | -8.4 | drug669  | -8.2 |
| drug978  | -8.1 | drug1007 | -8.4 | drug746  | -8.2 |
| drug998  | -8.1 | drug1020 | -8.4 | drug747  | -8.2 |
| drug1043 | -8.1 | drug1030 | -8.4 | drug757  | -8.2 |
| drug1063 | -8.1 | drug1033 | -8.4 | drug799  | -8.2 |
| drug1133 | -8.1 | drug1098 | -8.4 | drug829  | -8.2 |
| drug1146 | -8.1 | drug1114 | -8.4 | drug846  | -8.2 |
| drug1147 | -8.1 | drug1115 | -8.4 | drug894  | -8.2 |
| drug1171 | -8.1 | drug1126 | -8.4 | drug939  | -8.2 |
| drug1178 | -8.1 | drug1127 | -8.4 | drug1076 | -8.2 |
| drug1282 | -8.1 | drug1178 | -8.4 | drug1082 | -8.2 |
| drug1288 | -8.1 | drug1215 | -8.4 | drug1095 | -8.2 |
| drug1387 | -8.1 | drug1257 | -8.4 | drug1115 | -8.2 |
| drug1400 | -8.1 | drug1320 | -8.4 | drug1116 | -8.2 |
| drug1416 | -8.1 | drug1332 | -8.4 | drug1132 | -8.2 |
| drug1430 | -8.1 | drug1370 | -8.4 | drug1144 | -8.2 |
| drug1431 | -8.1 | drug1381 | -8.4 | drug1169 | -8.2 |
| drug1434 | -8.1 | drug1386 | -8.4 | drug1179 | -8.2 |
| drug44   | -8   | drug1399 | -8.4 | drug1250 | -8.2 |
| drug48   | -8   | drug1436 | -8.4 | drug1266 | -8.2 |
| drug115  | -8   | drug1477 | -8.4 | drug1330 | -8.2 |
| drug124  | -8   | drug48   | -8.3 | drug1343 | -8.2 |
| drug136  | -8   | drug61   | -8.3 | drug1344 | -8.2 |
| drug147  | -8   | drug84   | -8.3 | drug1346 | -8.2 |
| drug164  | -8   | drug85   | -8.3 | drug1372 | -8.2 |
| drug189  | -8   | drug94   | -8.3 | drug1376 | -8.2 |
| drug207  | -8   | drug97   | -8.3 | drug1384 | -8.2 |
| drug220  | -8   | drug110  | -8.3 | drug1422 | -8.2 |
| drug270  | -8   | drug134  | -8.3 | drug1458 | -8.2 |
| drug291  | -8   | drug245  | -8.3 | drug1487 | -8.2 |



|          |    |          |      |          |      |
|----------|----|----------|------|----------|------|
| drug342  | -8 | drug251  | -8.3 | drug27   | -8.1 |
| drug385  | -8 | drug257  | -8.3 | drug52   | -8.1 |
| drug393  | -8 | drug326  | -8.3 | drug54   | -8.1 |
| drug408  | -8 | drug351  | -8.3 | drug61   | -8.1 |
| drug438  | -8 | drug383  | -8.3 | drug78   | -8.1 |
| drug440  | -8 | drug387  | -8.3 | drug134  | -8.1 |
| drug479  | -8 | drug400  | -8.3 | drug269  | -8.1 |
| drug488  | -8 | drug448  | -8.3 | drug332  | -8.1 |
| drug505  | -8 | drug456  | -8.3 | drug341  | -8.1 |
| drug510  | -8 | drug466  | -8.3 | drug366  | -8.1 |
| drug522  | -8 | drug478  | -8.3 | drug384  | -8.1 |
| drug569  | -8 | drug502  | -8.3 | drug394  | -8.1 |
| drug571  | -8 | drug518  | -8.3 | drug400  | -8.1 |
| drug572  | -8 | drug537  | -8.3 | drug445  | -8.1 |
| drug622  | -8 | drug557  | -8.3 | drug449  | -8.1 |
| drug688  | -8 | drug565  | -8.3 | drug461  | -8.1 |
| drug703  | -8 | drug599  | -8.3 | drug478  | -8.1 |
| drug722  | -8 | drug604  | -8.3 | drug480  | -8.1 |
| drug738  | -8 | drug611  | -8.3 | drug481  | -8.1 |
| drug740  | -8 | drug634  | -8.3 | drug519  | -8.1 |
| drug769  | -8 | drug646  | -8.3 | drug536  | -8.1 |
| drug777  | -8 | drug655  | -8.3 | drug545  | -8.1 |
| drug794  | -8 | drug723  | -8.3 | drug623  | -8.1 |
| drug830  | -8 | drug796  | -8.3 | drug629  | -8.1 |
| drug833  | -8 | drug819  | -8.3 | drug643  | -8.1 |
| drug861  | -8 | drug851  | -8.3 | drug676  | -8.1 |
| drug864  | -8 | drug901  | -8.3 | drug705  | -8.1 |
| drug875  | -8 | drug918  | -8.3 | drug717  | -8.1 |
| drug917  | -8 | drug963  | -8.3 | drug745  | -8.1 |
| drug947  | -8 | drug964  | -8.3 | drug774  | -8.1 |
| drug956  | -8 | drug975  | -8.3 | drug817  | -8.1 |
| drug972  | -8 | drug981  | -8.3 | drug832  | -8.1 |
| drug988  | -8 | drug986  | -8.3 | drug847  | -8.1 |
| drug990  | -8 | drug1027 | -8.3 | drug848  | -8.1 |
| drug1039 | -8 | drug1031 | -8.3 | drug875  | -8.1 |
| drug1051 | -8 | drug1040 | -8.3 | drug877  | -8.1 |
| drug1078 | -8 | drug1077 | -8.3 | drug885  | -8.1 |
| drug1105 | -8 | drug1139 | -8.3 | drug963  | -8.1 |
| drug1131 | -8 | drug1174 | -8.3 | drug981  | -8.1 |
| drug1140 | -8 | drug1220 | -8.3 | drug998  | -8.1 |
| drug1156 | -8 | drug1232 | -8.3 | drug1004 | -8.1 |
| drug1202 | -8 | drug1248 | -8.3 | drug1016 | -8.1 |
| drug1209 | -8 | drug1339 | -8.3 | drug1093 | -8.1 |
| drug1221 | -8 | drug1355 | -8.3 | drug1105 | -8.1 |
| drug1230 | -8 | drug1367 | -8.3 | drug1114 | -8.1 |
| drug1241 | -8 | drug1402 | -8.3 | drug1171 | -8.1 |
| drug1257 | -8 | drug1408 | -8.3 | drug1193 | -8.1 |

|          |      |          |      |          |      |
|----------|------|----------|------|----------|------|
| drug1279 | -8   | drug1427 | -8.3 | drug1198 | -8.1 |
| drug1280 | -8   | drug1442 | -8.3 | drug1242 | -8.1 |
| drug1304 | -8   | drug1470 | -8.3 | drug1320 | -8.1 |
| drug1321 | -8   | drug1473 | -8.3 | drug1325 | -8.1 |
| drug1335 | -8   | drug1478 | -8.3 | drug1350 | -8.1 |
| drug1344 | -8   | drug1500 | -8.3 | drug1387 | -8.1 |
| drug1358 | -8   | drug23   | -8.2 | drug1394 | -8.1 |
| drug1371 | -8   | drug82   | -8.2 | drug1402 | -8.1 |
| drug1380 | -8   | drug93   | -8.2 | drug1406 | -8.1 |
| drug1399 | -8   | drug139  | -8.2 | drug1433 | -8.1 |
| drug1414 | -8   | drug147  | -8.2 | drug1456 | -8.1 |
| drug1465 | -8   | drug182  | -8.2 | drug1491 | -8.1 |
| drug1487 | -8   | drug184  | -8.2 | drug21   | -8   |
| drug1490 | -8   | drug208  | -8.2 | drug69   | -8   |
| drug12   | -7.9 | drug231  | -8.2 | drug125  | -8   |
| drug47   | -7.9 | drug279  | -8.2 | drug233  | -8   |
| drug50   | -7.9 | drug325  | -8.2 | drug267  | -8   |
| drug59   | -7.9 | drug335  | -8.2 | drug281  | -8   |
| drug103  | -7.9 | drug346  | -8.2 | drug289  | -8   |
| drug125  | -7.9 | drug418  | -8.2 | drug315  | -8   |
| drug138  | -7.9 | drug447  | -8.2 | drug342  | -8   |
| drug155  | -7.9 | drug450  | -8.2 | drug388  | -8   |
| drug171  | -7.9 | drug480  | -8.2 | drug395  | -8   |
| drug172  | -7.9 | drug481  | -8.2 | drug406  | -8   |
| drug185  | -7.9 | drug501  | -8.2 | drug453  | -8   |
| drug216  | -7.9 | drug503  | -8.2 | drug511  | -8   |
| drug236  | -7.9 | drug581  | -8.2 | drug544  | -8   |
| drug303  | -7.9 | drug607  | -8.2 | drug588  | -8   |
| drug307  | -7.9 | drug669  | -8.2 | drug616  | -8   |
| drug341  | -7.9 | drug674  | -8.2 | drug702  | -8   |
| drug371  | -7.9 | drug676  | -8.2 | drug729  | -8   |
| drug394  | -7.9 | drug695  | -8.2 | drug750  | -8   |
| drug399  | -7.9 | drug701  | -8.2 | drug766  | -8   |
| drug402  | -7.9 | drug702  | -8.2 | drug771  | -8   |
| drug445  | -7.9 | drug734  | -8.2 | drug844  | -8   |
| drug456  | -7.9 | drug741  | -8.2 | drug856  | -8   |
| drug471  | -7.9 | drug774  | -8.2 | drug918  | -8   |
| drug478  | -7.9 | drug801  | -8.2 | drug929  | -8   |
| drug495  | -7.9 | drug871  | -8.2 | drug940  | -8   |
| drug504  | -7.9 | drug905  | -8.2 | drug948  | -8   |
| drug547  | -7.9 | drug921  | -8.2 | drug1028 | -8   |
| drug567  | -7.9 | drug926  | -8.2 | drug1053 | -8   |
| drug568  | -7.9 | drug927  | -8.2 | drug1073 | -8   |
| drug577  | -7.9 | drug990  | -8.2 | drug1127 | -8   |
| drug584  | -7.9 | drug997  | -8.2 | drug1141 | -8   |
| drug599  | -7.9 | drug1005 | -8.2 | drug1174 | -8   |
| drug623  | -7.9 | drug1012 | -8.2 | drug1180 | -8   |

|          |      |          |      |          |      |
|----------|------|----------|------|----------|------|
| drug628  | -7.9 | drug1065 | -8.2 | drug1211 | -8   |
| drug633  | -7.9 | drug1101 | -8.2 | drug1234 | -8   |
| drug747  | -7.9 | drug1125 | -8.2 | drug1249 | -8   |
| drug750  | -7.9 | drug1151 | -8.2 | drug1304 | -8   |
| drug757  | -7.9 | drug1180 | -8.2 | drug1311 | -8   |
| drug762  | -7.9 | drug1255 | -8.2 | drug1323 | -8   |
| drug765  | -7.9 | drug1281 | -8.2 | drug1324 | -8   |
| drug819  | -7.9 | drug1321 | -8.2 | drug1339 | -8   |
| drug832  | -7.9 | drug1357 | -8.2 | drug1367 | -8   |
| drug844  | -7.9 | drug1368 | -8.2 | drug1380 | -8   |
| drug846  | -7.9 | drug1371 | -8.2 | drug1424 | -8   |
| drug847  | -7.9 | drug1373 | -8.2 | drug1434 | -8   |
| drug878  | -7.9 | drug1394 | -8.2 | drug60   | -7.9 |
| drug908  | -7.9 | drug1430 | -8.2 | drug72   | -7.9 |
| drug912  | -7.9 | drug1493 | -8.2 | drug82   | -7.9 |
| drug971  | -7.9 | drug24   | -8.1 | drug83   | -7.9 |
| drug995  | -7.9 | drug26   | -8.1 | drug139  | -7.9 |
| drug1020 | -7.9 | drug56   | -8.1 | drug174  | -7.9 |
| drug1026 | -7.9 | drug73   | -8.1 | drug183  | -7.9 |
| drug1028 | -7.9 | drug83   | -8.1 | drug197  | -7.9 |
| drug1032 | -7.9 | drug119  | -8.1 | drug207  | -7.9 |
| drug1065 | -7.9 | drug140  | -8.1 | drug210  | -7.9 |
| drug1134 | -7.9 | drug155  | -8.1 | drug236  | -7.9 |
| drug1190 | -7.9 | drug214  | -8.1 | drug272  | -7.9 |
| drug1198 | -7.9 | drug243  | -8.1 | drug275  | -7.9 |
| drug1227 | -7.9 | drug260  | -8.1 | drug282  | -7.9 |
| drug1236 | -7.9 | drug370  | -8.1 | drug309  | -7.9 |
| drug1244 | -7.9 | drug384  | -8.1 | drug359  | -7.9 |
| drug1285 | -7.9 | drug393  | -8.1 | drug402  | -7.9 |
| drug1317 | -7.9 | drug415  | -8.1 | drug405  | -7.9 |
| drug1327 | -7.9 | drug422  | -8.1 | drug471  | -7.9 |
| drug1365 | -7.9 | drug482  | -8.1 | drug507  | -7.9 |
| drug1376 | -7.9 | drug517  | -8.1 | drug532  | -7.9 |
| drug1401 | -7.9 | drug521  | -8.1 | drug540  | -7.9 |
| drug1424 | -7.9 | drug556  | -8.1 | drug605  | -7.9 |
| drug1429 | -7.9 | drug626  | -8.1 | drug641  | -7.9 |
| drug1447 | -7.9 | drug632  | -8.1 | drug701  | -7.9 |
| drug1500 | -7.9 | drug638  | -8.1 | drug710  | -7.9 |
| drug55   | -7.8 | drug654  | -8.1 | drug714  | -7.9 |
| drug58   | -7.8 | drug666  | -8.1 | drug744  | -7.9 |
| drug61   | -7.8 | drug696  | -8.1 | drug762  | -7.9 |
| drug69   | -7.8 | drug706  | -8.1 | drug765  | -7.9 |
| drug72   | -7.8 | drug716  | -8.1 | drug775  | -7.9 |
| drug81   | -7.8 | drug738  | -8.1 | drug793  | -7.9 |
| drug82   | -7.8 | drug758  | -8.1 | drug794  | -7.9 |
| drug93   | -7.8 | drug766  | -8.1 | drug866  | -7.9 |
| drug174  | -7.8 | drug767  | -8.1 | drug876  | -7.9 |

|          |      |          |      |          |      |
|----------|------|----------|------|----------|------|
| drug184  | -7.8 | drug769  | -8.1 | drug919  | -7.9 |
| drug245  | -7.8 | drug795  | -8.1 | drug931  | -7.9 |
| drug250  | -7.8 | drug808  | -8.1 | drug964  | -7.9 |
| drug259  | -7.8 | drug853  | -8.1 | drug996  | -7.9 |
| drug282  | -7.8 | drug887  | -8.1 | drug1010 | -7.9 |
| drug335  | -7.8 | drug896  | -8.1 | drug1033 | -7.9 |
| drug355  | -7.8 | drug898  | -8.1 | drug1042 | -7.9 |
| drug386  | -7.8 | drug947  | -8.1 | drug1057 | -7.9 |
| drug419  | -7.8 | drug961  | -8.1 | drug1064 | -7.9 |
| drug453  | -7.8 | drug970  | -8.1 | drug1122 | -7.9 |
| drug481  | -7.8 | drug1038 | -8.1 | drug1136 | -7.9 |
| drug489  | -7.8 | drug1046 | -8.1 | drug1153 | -7.9 |
| drug534  | -7.8 | drug1052 | -8.1 | drug1199 | -7.9 |
| drug557  | -7.8 | drug1102 | -8.1 | drug1220 | -7.9 |
| drug593  | -7.8 | drug1120 | -8.1 | drug1244 | -7.9 |
| drug603  | -7.8 | drug1122 | -8.1 | drug1252 | -7.9 |
| drug605  | -7.8 | drug1194 | -8.1 | drug1264 | -7.9 |
| drug607  | -7.8 | drug1206 | -8.1 | drug1279 | -7.9 |
| drug614  | -7.8 | drug1214 | -8.1 | drug1347 | -7.9 |
| drug615  | -7.8 | drug1218 | -8.1 | drug1351 | -7.9 |
| drug617  | -7.8 | drug1236 | -8.1 | drug1354 | -7.9 |
| drug715  | -7.8 | drug1237 | -8.1 | drug1355 | -7.9 |
| drug720  | -7.8 | drug1251 | -8.1 | drug1356 | -7.9 |
| drug744  | -7.8 | drug1267 | -8.1 | drug1368 | -7.9 |
| drug746  | -7.8 | drug1274 | -8.1 | drug1397 | -7.9 |
| drug822  | -7.8 | drug1294 | -8.1 | drug1436 | -7.9 |
| drug876  | -7.8 | drug1303 | -8.1 | drug1439 | -7.9 |
| drug886  | -7.8 | drug1324 | -8.1 | drug1459 | -7.9 |
| drug890  | -7.8 | drug1337 | -8.1 | drug20   | -7.8 |
| drug891  | -7.8 | drug1365 | -8.1 | drug62   | -7.8 |
| drug894  | -7.8 | drug1385 | -8.1 | drug68   | -7.8 |
| drug901  | -7.8 | drug1421 | -8.1 | drug73   | -7.8 |
| drug921  | -7.8 | drug1425 | -8.1 | drug75   | -7.8 |
| drug926  | -7.8 | drug1439 | -8.1 | drug109  | -7.8 |
| drug942  | -7.8 | drug1465 | -8.1 | drug124  | -7.8 |
| drug973  | -7.8 | drug28   | -8   | drug126  | -7.8 |
| drug1002 | -7.8 | drug74   | -8   | drug140  | -7.8 |
| drug1057 | -7.8 | drug165  | -8   | drug166  | -7.8 |
| drug1060 | -7.8 | drug169  | -8   | drug182  | -7.8 |
| drug1067 | -7.8 | drug197  | -8   | drug184  | -7.8 |
| drug1073 | -7.8 | drug206  | -8   | drug250  | -7.8 |
| drug1093 | -7.8 | drug248  | -8   | drug291  | -7.8 |
| drug1101 | -7.8 | drug267  | -8   | drug327  | -7.8 |
| drug1111 | -7.8 | drug268  | -8   | drug344  | -7.8 |
| drug1169 | -7.8 | drug291  | -8   | drug361  | -7.8 |
| drug1174 | -7.8 | drug373  | -8   | drug368  | -7.8 |
| drug1180 | -7.8 | drug388  | -8   | drug369  | -7.8 |

|          |      |          |      |          |      |
|----------|------|----------|------|----------|------|
| drug1204 | -7.8 | drug414  | -8   | drug383  | -7.8 |
| drug1212 | -7.8 | drug442  | -8   | drug408  | -7.8 |
| drug1218 | -7.8 | drug460  | -8   | drug419  | -7.8 |
| drug1231 | -7.8 | drug470  | -8   | drug458  | -7.8 |
| drug1248 | -7.8 | drug474  | -8   | drug470  | -7.8 |
| drug1281 | -7.8 | drug509  | -8   | drug496  | -7.8 |
| drug1286 | -7.8 | drug572  | -8   | drug534  | -7.8 |
| drug1287 | -7.8 | drug637  | -8   | drug537  | -7.8 |
| drug1356 | -7.8 | drug651  | -8   | drug563  | -7.8 |
| drug1368 | -7.8 | drug658  | -8   | drug585  | -7.8 |
| drug1402 | -7.8 | drug677  | -8   | drug593  | -7.8 |
| drug1485 | -7.8 | drug711  | -8   | drug606  | -7.8 |
| drug20   | -7.7 | drug729  | -8   | drug628  | -7.8 |
| drug62   | -7.7 | drug753  | -8   | drug630  | -7.8 |
| drug78   | -7.7 | drug832  | -8   | drug662  | -7.8 |
| drug118  | -7.7 | drug873  | -8   | drug735  | -7.8 |
| drug119  | -7.7 | drug886  | -8   | drug751  | -7.8 |
| drug169  | -7.7 | drug968  | -8   | drug753  | -7.8 |
| drug182  | -7.7 | drug985  | -8   | drug758  | -7.8 |
| drug187  | -7.7 | drug994  | -8   | drug767  | -7.8 |
| drug197  | -7.7 | drug1018 | -8   | drug796  | -7.8 |
| drug200  | -7.7 | drug1025 | -8   | drug884  | -7.8 |
| drug238  | -7.7 | drug1036 | -8   | drug892  | -7.8 |
| drug247  | -7.7 | drug1043 | -8   | drug905  | -7.8 |
| drug264  | -7.7 | drug1053 | -8   | drug917  | -7.8 |
| drug268  | -7.7 | drug1082 | -8   | drug980  | -7.8 |
| drug302  | -7.7 | drug1097 | -8   | drug1026 | -7.8 |
| drug326  | -7.7 | drug1106 | -8   | drug1066 | -7.8 |
| drug331  | -7.7 | drug1111 | -8   | drug1067 | -7.8 |
| drug332  | -7.7 | drug1119 | -8   | drug1117 | -7.8 |
| drug356  | -7.7 | drug1171 | -8   | drug1119 | -7.8 |
| drug378  | -7.7 | drug1182 | -8   | drug1134 | -7.8 |
| drug387  | -7.7 | drug1219 | -8   | drug1143 | -7.8 |
| drug405  | -7.7 | drug1277 | -8   | drug1200 | -7.8 |
| drug406  | -7.7 | drug1323 | -8   | drug1202 | -7.8 |
| drug437  | -7.7 | drug1349 | -8   | drug1222 | -7.8 |
| drug480  | -7.7 | drug1351 | -8   | drug1236 | -7.8 |
| drug486  | -7.7 | drug1383 | -8   | drug1240 | -7.8 |
| drug497  | -7.7 | drug1403 | -8   | drug1267 | -7.8 |
| drug532  | -7.7 | drug1456 | -8   | drug1282 | -7.8 |
| drug536  | -7.7 | drug1492 | -8   | drug1287 | -7.8 |
| drug549  | -7.7 | drug10   | -7.9 | drug1289 | -7.8 |
| drug558  | -7.7 | drug115  | -7.9 | drug1348 | -7.8 |
| drug570  | -7.7 | drug124  | -7.9 | drug1359 | -7.8 |
| drug580  | -7.7 | drug127  | -7.9 | drug1448 | -7.8 |
| drug606  | -7.7 | drug191  | -7.9 | drug1486 | -7.8 |
| drug608  | -7.7 | drug204  | -7.9 | drug77   | -7.7 |

|          |      |          |      |          |      |
|----------|------|----------|------|----------|------|
| drug609  | -7.7 | drug215  | -7.9 | drug117  | -7.7 |
| drug635  | -7.7 | drug216  | -7.9 | drug168  | -7.7 |
| drug636  | -7.7 | drug244  | -7.9 | drug170  | -7.7 |
| drug640  | -7.7 | drug312  | -7.9 | drug199  | -7.7 |
| drug656  | -7.7 | drug319  | -7.9 | drug216  | -7.7 |
| drug662  | -7.7 | drug338  | -7.9 | drug230  | -7.7 |
| drug668  | -7.7 | drug343  | -7.9 | drug247  | -7.7 |
| drug677  | -7.7 | drug361  | -7.9 | drug251  | -7.7 |
| drug698  | -7.7 | drug365  | -7.9 | drug288  | -7.7 |
| drug702  | -7.7 | drug449  | -7.9 | drug290  | -7.7 |
| drug732  | -7.7 | drug453  | -7.9 | drug335  | -7.7 |
| drug753  | -7.7 | drug479  | -7.9 | drug354  | -7.7 |
| drug780  | -7.7 | drug487  | -7.9 | drug363  | -7.7 |
| drug782  | -7.7 | drug577  | -7.9 | drug365  | -7.7 |
| drug783  | -7.7 | drug620  | -7.9 | drug398  | -7.7 |
| drug793  | -7.7 | drug656  | -7.9 | drug474  | -7.7 |
| drug823  | -7.7 | drug699  | -7.9 | drug518  | -7.7 |
| drug862  | -7.7 | drug731  | -7.9 | drug524  | -7.7 |
| drug867  | -7.7 | drug810  | -7.9 | drug535  | -7.7 |
| drug884  | -7.7 | drug826  | -7.9 | drug549  | -7.7 |
| drug893  | -7.7 | drug835  | -7.9 | drug556  | -7.7 |
| drug944  | -7.7 | drug839  | -7.9 | drug572  | -7.7 |
| drug955  | -7.7 | drug929  | -7.9 | drug573  | -7.7 |
| drug958  | -7.7 | drug1085 | -7.9 | drug577  | -7.7 |
| drug976  | -7.7 | drug1136 | -7.9 | drug579  | -7.7 |
| drug985  | -7.7 | drug1152 | -7.9 | drug586  | -7.7 |
| drug987  | -7.7 | drug1161 | -7.9 | drug634  | -7.7 |
| drug1033 | -7.7 | drug1165 | -7.9 | drug647  | -7.7 |
| drug1040 | -7.7 | drug1169 | -7.9 | drug666  | -7.7 |
| drug1050 | -7.7 | drug1179 | -7.9 | drug721  | -7.7 |
| drug1102 | -7.7 | drug1198 | -7.9 | drug741  | -7.7 |
| drug1115 | -7.7 | drug1278 | -7.9 | drug764  | -7.7 |
| drug1119 | -7.7 | drug1292 | -7.9 | drug778  | -7.7 |
| drug1126 | -7.7 | drug1310 | -7.9 | drug819  | -7.7 |
| drug1132 | -7.7 | drug1317 | -7.9 | drug824  | -7.7 |
| drug1143 | -7.7 | drug1327 | -7.9 | drug836  | -7.7 |
| drug1162 | -7.7 | drug1377 | -7.9 | drug851  | -7.7 |
| drug1175 | -7.7 | drug1397 | -7.9 | drug901  | -7.7 |
| drug1234 | -7.7 | drug1410 | -7.9 | drug920  | -7.7 |
| drug1239 | -7.7 | drug1417 | -7.9 | drug974  | -7.7 |
| drug1262 | -7.7 | drug1433 | -7.9 | drug1030 | -7.7 |
| drug1298 | -7.7 | drug1453 | -7.9 | drug1061 | -7.7 |
| drug1299 | -7.7 | drug1457 | -7.9 | drug1126 | -7.7 |
| drug1320 | -7.7 | drug1461 | -7.9 | drug1140 | -7.7 |
| drug1331 | -7.7 | drug1469 | -7.9 | drug1156 | -7.7 |
| drug1352 | -7.7 | drug62   | -7.8 | drug1165 | -7.7 |
| drug1382 | -7.7 | drug80   | -7.8 | drug1191 | -7.7 |

|          |      |          |      |          |      |
|----------|------|----------|------|----------|------|
| drug1403 | -7.7 | drug238  | -7.8 | drug1192 | -7.7 |
| drug1405 | -7.7 | drug290  | -7.8 | drug1214 | -7.7 |
| drug1425 | -7.7 | drug305  | -7.8 | drug1257 | -7.7 |
| drug1433 | -7.7 | drug307  | -7.8 | drug1283 | -7.7 |
| drug1458 | -7.7 | drug341  | -7.8 | drug1292 | -7.7 |
| drug1484 | -7.7 | drug417  | -7.8 | drug1295 | -7.7 |
| drug77   | -7.6 | drug446  | -7.8 | drug1331 | -7.7 |
| drug85   | -7.6 | drug451  | -7.8 | drug1337 | -7.7 |
| drug95   | -7.6 | drug469  | -7.8 | drug1364 | -7.7 |
| drug140  | -7.6 | drug485  | -7.8 | drug1366 | -7.7 |
| drug141  | -7.6 | drug524  | -7.8 | drug1369 | -7.7 |
| drug183  | -7.6 | drug526  | -7.8 | drug1385 | -7.7 |
| drug208  | -7.6 | drug534  | -7.8 | drug1386 | -7.7 |
| drug212  | -7.6 | drug548  | -7.8 | drug1423 | -7.7 |
| drug230  | -7.6 | drug549  | -7.8 | drug1427 | -7.7 |
| drug231  | -7.6 | drug558  | -7.8 | drug1429 | -7.7 |
| drug232  | -7.6 | drug623  | -7.8 | drug1466 | -7.7 |
| drug257  | -7.6 | drug697  | -7.8 | drug1478 | -7.7 |
| drug321  | -7.6 | drug698  | -7.8 | drug1488 | -7.7 |
| drug336  | -7.6 | drug737  | -7.8 | drug43   | -7.6 |
| drug359  | -7.6 | drug740  | -7.8 | drug56   | -7.6 |
| drug363  | -7.6 | drug776  | -7.8 | drug119  | -7.6 |
| drug368  | -7.6 | drug834  | -7.8 | drug136  | -7.6 |
| drug407  | -7.6 | drug878  | -7.8 | drug189  | -7.6 |
| drug458  | -7.6 | drug897  | -7.8 | drug245  | -7.6 |
| drug472  | -7.6 | drug899  | -7.8 | drug257  | -7.6 |
| drug616  | -7.6 | drug904  | -7.8 | drug265  | -7.6 |
| drug644  | -7.6 | drug917  | -7.8 | drug279  | -7.6 |
| drug645  | -7.6 | drug1014 | -7.8 | drug301  | -7.6 |
| drug655  | -7.6 | drug1042 | -7.8 | drug374  | -7.6 |
| drug661  | -7.6 | drug1051 | -7.8 | drug375  | -7.6 |
| drug669  | -7.6 | drug1094 | -7.8 | drug420  | -7.6 |
| drug681  | -7.6 | drug1116 | -7.8 | drug462  | -7.6 |
| drug701  | -7.6 | drug1137 | -7.8 | drug499  | -7.6 |
| drug768  | -7.6 | drug1153 | -7.8 | drug548  | -7.6 |
| drug781  | -7.6 | drug1189 | -7.8 | drug576  | -7.6 |
| drug834  | -7.6 | drug1193 | -7.8 | drug609  | -7.6 |
| drug866  | -7.6 | drug1196 | -7.8 | drug650  | -7.6 |
| drug885  | -7.6 | drug1247 | -7.8 | drug652  | -7.6 |
| drug888  | -7.6 | drug1252 | -7.8 | drug654  | -7.6 |
| drug910  | -7.6 | drug1254 | -7.8 | drug667  | -7.6 |
| drug916  | -7.6 | drug1261 | -7.8 | drug715  | -7.6 |
| drug919  | -7.6 | drug1266 | -7.8 | drug719  | -7.6 |
| drug941  | -7.6 | drug1299 | -7.8 | drug772  | -7.6 |
| drug975  | -7.6 | drug1313 | -7.8 | drug791  | -7.6 |
| drug980  | -7.6 | drug1382 | -7.8 | drug860  | -7.6 |
| drug996  | -7.6 | drug1412 | -7.8 | drug865  | -7.6 |

|          |      |          |      |          |      |
|----------|------|----------|------|----------|------|
| drug1019 | -7.6 | drug1446 | -7.8 | drug871  | -7.6 |
| drug1042 | -7.6 | drug1474 | -7.8 | drug886  | -7.6 |
| drug1047 | -7.6 | drug12   | -7.7 | drug888  | -7.6 |
| drug1062 | -7.6 | drug43   | -7.7 | drug911  | -7.6 |
| drug1094 | -7.6 | drug141  | -7.7 | drug959  | -7.6 |
| drug1109 | -7.6 | drug183  | -7.7 | drug976  | -7.6 |
| drug1117 | -7.6 | drug192  | -7.7 | drug1019 | -7.6 |
| drug1120 | -7.6 | drug259  | -7.7 | drug1039 | -7.6 |
| drug1129 | -7.6 | drug298  | -7.7 | drug1062 | -7.6 |
| drug1137 | -7.6 | drug302  | -7.7 | drug1077 | -7.6 |
| drug1138 | -7.6 | drug322  | -7.7 | drug1118 | -7.6 |
| drug1199 | -7.6 | drug366  | -7.7 | drug1133 | -7.6 |
| drug1200 | -7.6 | drug408  | -7.7 | drug1139 | -7.6 |
| drug1203 | -7.6 | drug419  | -7.7 | drug1164 | -7.6 |
| drug1211 | -7.6 | drug473  | -7.7 | drug1181 | -7.6 |
| drug1251 | -7.6 | drug488  | -7.7 | drug1209 | -7.6 |
| drug1252 | -7.6 | drug506  | -7.7 | drug1227 | -7.6 |
| drug1256 | -7.6 | drug510  | -7.7 | drug1275 | -7.6 |
| drug1261 | -7.6 | drug519  | -7.7 | drug1317 | -7.6 |
| drug1264 | -7.6 | drug550  | -7.7 | drug1336 | -7.6 |
| drug1296 | -7.6 | drug576  | -7.7 | drug1353 | -7.6 |
| drug1311 | -7.6 | drug579  | -7.7 | drug1373 | -7.6 |
| drug1330 | -7.6 | drug667  | -7.7 | drug1404 | -7.6 |
| drug1332 | -7.6 | drug668  | -7.7 | drug1409 | -7.6 |
| drug1346 | -7.6 | drug681  | -7.7 | drug1457 | -7.6 |
| drug1353 | -7.6 | drug682  | -7.7 | drug1465 | -7.6 |
| drug1366 | -7.6 | drug693  | -7.7 | drug59   | -7.5 |
| drug1372 | -7.6 | drug728  | -7.7 | drug129  | -7.5 |
| drug1373 | -7.6 | drug765  | -7.7 | drug141  | -7.5 |
| drug1423 | -7.6 | drug865  | -7.7 | drug264  | -7.5 |
| drug1446 | -7.6 | drug884  | -7.7 | drug274  | -7.5 |
| drug1459 | -7.6 | drug916  | -7.7 | drug286  | -7.5 |
| drug1470 | -7.6 | drug955  | -7.7 | drug287  | -7.5 |
| drug1473 | -7.6 | drug996  | -7.7 | drug293  | -7.5 |
| drug1474 | -7.6 | drug1002 | -7.7 | drug312  | -7.5 |
| drug1491 | -7.6 | drug1092 | -7.7 | drug314  | -7.5 |
| drug1498 | -7.6 | drug1142 | -7.7 | drug318  | -7.5 |
| drug60   | -7.5 | drug1150 | -7.7 | drug346  | -7.5 |
| drug83   | -7.5 | drug1205 | -7.7 | drug356  | -7.5 |
| drug84   | -7.5 | drug1208 | -7.7 | drug364  | -7.5 |
| drug94   | -7.5 | drug1280 | -7.7 | drug389  | -7.5 |
| drug97   | -7.5 | drug1293 | -7.7 | drug476  | -7.5 |
| drug109  | -7.5 | drug1333 | -7.7 | drug498  | -7.5 |
| drug129  | -7.5 | drug1424 | -7.7 | drug550  | -7.5 |
| drug265  | -7.5 | drug1431 | -7.7 | drug583  | -7.5 |
| drug272  | -7.5 | drug1458 | -7.7 | drug592  | -7.5 |
| drug275  | -7.5 | drug47   | -7.6 | drug604  | -7.5 |



|          |      |          |      |          |      |
|----------|------|----------|------|----------|------|
| drug288  | -7.5 | drug53   | -7.6 | drug674  | -7.5 |
| drug301  | -7.5 | drug90   | -7.6 | drug691  | -7.5 |
| drug362  | -7.5 | drug103  | -7.6 | drug748  | -7.5 |
| drug373  | -7.5 | drug168  | -7.6 | drug752  | -7.5 |
| drug384  | -7.5 | drug187  | -7.6 | drug755  | -7.5 |
| drug397  | -7.5 | drug201  | -7.6 | drug761  | -7.5 |
| drug473  | -7.5 | drug228  | -7.6 | drug825  | -7.5 |
| drug499  | -7.5 | drug236  | -7.6 | drug827  | -7.5 |
| drug551  | -7.5 | drug303  | -7.6 | drug837  | -7.5 |
| drug563  | -7.5 | drug328  | -7.6 | drug881  | -7.5 |
| drug565  | -7.5 | drug367  | -7.6 | drug941  | -7.5 |
| drug585  | -7.5 | drug394  | -7.6 | drug943  | -7.5 |
| drug588  | -7.5 | drug401  | -7.6 | drug957  | -7.5 |
| drug602  | -7.5 | drug403  | -7.6 | drug968  | -7.5 |
| drug631  | -7.5 | drug574  | -7.6 | drug1008 | -7.5 |
| drug687  | -7.5 | drug602  | -7.6 | drug1020 | -7.5 |
| drug699  | -7.5 | drug617  | -7.6 | drug1027 | -7.5 |
| drug743  | -7.5 | drug630  | -7.6 | drug1031 | -7.5 |
| drug798  | -7.5 | drug648  | -7.6 | drug1040 | -7.5 |
| drug827  | -7.5 | drug659  | -7.6 | drug1048 | -7.5 |
| drug868  | -7.5 | drug684  | -7.6 | drug1070 | -7.5 |
| drug922  | -7.5 | drug717  | -7.6 | drug1138 | -7.5 |
| drug924  | -7.5 | drug746  | -7.6 | drug1148 | -7.5 |
| drug933  | -7.5 | drug764  | -7.6 | drug1161 | -7.5 |
| drug949  | -7.5 | drug773  | -7.6 | drug1190 | -7.5 |
| drug964  | -7.5 | drug880  | -7.6 | drug1226 | -7.5 |
| drug981  | -7.5 | drug900  | -7.6 | drug1231 | -7.5 |
| drug984  | -7.5 | drug911  | -7.6 | drug1238 | -7.5 |
| drug1000 | -7.5 | drug934  | -7.6 | drug1247 | -7.5 |
| drug1001 | -7.5 | drug946  | -7.6 | drug1251 | -7.5 |
| drug1031 | -7.5 | drug1010 | -7.6 | drug1291 | -7.5 |
| drug1048 | -7.5 | drug1037 | -7.6 | drug1312 | -7.5 |
| drug1049 | -7.5 | drug1041 | -7.6 | drug1349 | -7.5 |
| drug1118 | -7.5 | drug1045 | -7.6 | drug1363 | -7.5 |
| drug1127 | -7.5 | drug1057 | -7.6 | drug1396 | -7.5 |
| drug1144 | -7.5 | drug1066 | -7.6 | drug1401 | -7.5 |
| drug1191 | -7.5 | drug1078 | -7.6 | drug1446 | -7.5 |
| drug1206 | -7.5 | drug1131 | -7.6 | drug1477 | -7.5 |
| drug1237 | -7.5 | drug1138 | -7.6 | drug1484 | -7.5 |
| drug1250 | -7.5 | drug1143 | -7.6 | drug12   | -7.4 |
| drug1254 | -7.5 | drug1217 | -7.6 | drug28   | -7.4 |
| drug1275 | -7.5 | drug1226 | -7.6 | drug47   | -7.4 |
| drug1289 | -7.5 | drug1231 | -7.6 | drug53   | -7.4 |
| drug1295 | -7.5 | drug1238 | -7.6 | drug55   | -7.4 |
| drug1300 | -7.5 | drug1250 | -7.6 | drug74   | -7.4 |
| drug1302 | -7.5 | drug1311 | -7.6 | drug79   | -7.4 |
| drug1325 | -7.5 | drug1344 | -7.6 | drug95   | -7.4 |

|          |      |          |      |          |      |
|----------|------|----------|------|----------|------|
| drug1345 | -7.5 | drug1358 | -7.6 | drug114  | -7.4 |
| drug1385 | -7.5 | drug1369 | -7.6 | drug115  | -7.4 |
| drug1407 | -7.5 | drug1378 | -7.6 | drug120  | -7.4 |
| drug1409 | -7.5 | drug1396 | -7.6 | drug135  | -7.4 |
| drug1417 | -7.5 | drug1401 | -7.6 | drug198  | -7.4 |
| drug1469 | -7.5 | drug1411 | -7.6 | drug208  | -7.4 |
| drug1475 | -7.5 | drug1418 | -7.6 | drug228  | -7.4 |
| drug28   | -7.4 | drug1438 | -7.6 | drug259  | -7.4 |
| drug56   | -7.4 | drug1459 | -7.6 | drug268  | -7.4 |
| drug73   | -7.4 | drug1499 | -7.6 | drug276  | -7.4 |
| drug86   | -7.4 | drug27   | -7.5 | drug277  | -7.4 |
| drug130  | -7.4 | drug33   | -7.5 | drug304  | -7.4 |
| drug198  | -7.4 | drug78   | -7.5 | drug317  | -7.4 |
| drug206  | -7.4 | drug125  | -7.5 | drug326  | -7.4 |
| drug248  | -7.4 | drug129  | -7.5 | drug329  | -7.4 |
| drug305  | -7.4 | drug138  | -7.5 | drug333  | -7.4 |
| drug306  | -7.4 | drug159  | -7.5 | drug362  | -7.4 |
| drug317  | -7.4 | drug200  | -7.5 | drug387  | -7.4 |
| drug327  | -7.4 | drug281  | -7.5 | drug422  | -7.4 |
| drug334  | -7.4 | drug395  | -7.5 | drug495  | -7.4 |
| drug364  | -7.4 | drug406  | -7.5 | drug504  | -7.4 |
| drug374  | -7.4 | drug544  | -7.5 | drug564  | -7.4 |
| drug375  | -7.4 | drug601  | -7.5 | drug567  | -7.4 |
| drug418  | -7.4 | drug614  | -7.5 | drug587  | -7.4 |
| drug435  | -7.4 | drug650  | -7.5 | drug619  | -7.4 |
| drug457  | -7.4 | drug709  | -7.5 | drug637  | -7.4 |
| drug469  | -7.4 | drug752  | -7.5 | drug644  | -7.4 |
| drug470  | -7.4 | drug759  | -7.5 | drug658  | -7.4 |
| drug503  | -7.4 | drug761  | -7.5 | drug661  | -7.4 |
| drug519  | -7.4 | drug763  | -7.5 | drug696  | -7.4 |
| drug574  | -7.4 | drug784  | -7.5 | drug698  | -7.4 |
| drug601  | -7.4 | drug820  | -7.5 | drug727  | -7.4 |
| drug604  | -7.4 | drug821  | -7.5 | drug768  | -7.4 |
| drug629  | -7.4 | drug831  | -7.5 | drug769  | -7.4 |
| drug637  | -7.4 | drug860  | -7.5 | drug773  | -7.4 |
| drug726  | -7.4 | drug928  | -7.5 | drug784  | -7.4 |
| drug756  | -7.4 | drug1019 | -7.5 | drug826  | -7.4 |
| drug795  | -7.4 | drug1032 | -7.5 | drug843  | -7.4 |
| drug799  | -7.4 | drug1067 | -7.5 | drug850  | -7.4 |
| drug801  | -7.4 | drug1074 | -7.5 | drug870  | -7.4 |
| drug809  | -7.4 | drug1075 | -7.5 | drug890  | -7.4 |
| drug848  | -7.4 | drug1103 | -7.5 | drug899  | -7.4 |
| drug872  | -7.4 | drug1159 | -7.5 | drug927  | -7.4 |
| drug887  | -7.4 | drug1170 | -7.5 | drug958  | -7.4 |
| drug952  | -7.4 | drug1195 | -7.5 | drug972  | -7.4 |
| drug959  | -7.4 | drug1199 | -7.5 | drug1022 | -7.4 |
| drug968  | -7.4 | drug1200 | -7.5 | drug1049 | -7.4 |

|          |      |          |      |          |      |
|----------|------|----------|------|----------|------|
| drug1027 | -7.4 | drug1210 | -7.5 | drug1071 | -7.4 |
| drug1030 | -7.4 | drug1284 | -7.5 | drug1152 | -7.4 |
| drug1037 | -7.4 | drug1298 | -7.5 | drug1207 | -7.4 |
| drug1045 | -7.4 | drug1300 | -7.5 | drug1212 | -7.4 |
| drug1064 | -7.4 | drug1302 | -7.5 | drug1217 | -7.4 |
| drug1122 | -7.4 | drug1326 | -7.5 | drug1219 | -7.4 |
| drug1139 | -7.4 | drug1354 | -7.5 | drug1221 | -7.4 |
| drug1141 | -7.4 | drug1364 | -7.5 | drug1224 | -7.4 |
| drug1145 | -7.4 | drug1366 | -7.5 | drug1243 | -7.4 |
| drug1160 | -7.4 | drug1405 | -7.5 | drug1256 | -7.4 |
| drug1167 | -7.4 | drug1449 | -7.5 | drug1281 | -7.4 |
| drug1170 | -7.4 | drug1466 | -7.5 | drug1286 | -7.4 |
| drug1179 | -7.4 | drug1475 | -7.5 | drug1352 | -7.4 |
| drug1267 | -7.4 | drug20   | -7.4 | drug1358 | -7.4 |
| drug1278 | -7.4 | drug30   | -7.4 | drug1374 | -7.4 |
| drug1292 | -7.4 | drug60   | -7.4 | drug1403 | -7.4 |
| drug1303 | -7.4 | drug136  | -7.4 | drug1405 | -7.4 |
| drug1322 | -7.4 | drug157  | -7.4 | drug1417 | -7.4 |
| drug1337 | -7.4 | drug232  | -7.4 | drug1454 | -7.4 |
| drug1347 | -7.4 | drug247  | -7.4 | drug23   | -7.3 |
| drug1350 | -7.4 | drug256  | -7.4 | drug58   | -7.3 |
| drug1369 | -7.4 | drug272  | -7.4 | drug85   | -7.3 |
| drug1374 | -7.4 | drug293  | -7.4 | drug187  | -7.3 |
| drug1397 | -7.4 | drug304  | -7.4 | drug206  | -7.3 |
| drug1404 | -7.4 | drug314  | -7.4 | drug273  | -7.3 |
| drug1418 | -7.4 | drug316  | -7.4 | drug292  | -7.3 |
| drug1440 | -7.4 | drug317  | -7.4 | drug305  | -7.3 |
| drug1444 | -7.4 | drug371  | -7.4 | drug306  | -7.3 |
| drug1452 | -7.4 | drug457  | -7.4 | drug325  | -7.3 |
| drug1477 | -7.4 | drug461  | -7.4 | drug334  | -7.3 |
| drug23   | -7.3 | drug535  | -7.4 | drug355  | -7.3 |
| drug75   | -7.3 | drug613  | -7.4 | drug401  | -7.3 |
| drug168  | -7.3 | drug629  | -7.4 | drug427  | -7.3 |
| drug228  | -7.3 | drug645  | -7.4 | drug442  | -7.3 |
| drug251  | -7.3 | drug660  | -7.4 | drug457  | -7.3 |
| drug279  | -7.3 | drug663  | -7.4 | drug472  | -7.3 |
| drug281  | -7.3 | drug719  | -7.4 | drug558  | -7.3 |
| drug287  | -7.3 | drug739  | -7.4 | drug568  | -7.3 |
| drug319  | -7.3 | drug745  | -7.4 | drug589  | -7.3 |
| drug338  | -7.3 | drug748  | -7.4 | drug598  | -7.3 |
| drug348  | -7.3 | drug806  | -7.4 | drug599  | -7.3 |
| drug361  | -7.3 | drug837  | -7.4 | drug671  | -7.3 |
| drug462  | -7.3 | drug875  | -7.4 | drug677  | -7.3 |
| drug500  | -7.3 | drug883  | -7.4 | drug713  | -7.3 |
| drug517  | -7.3 | drug962  | -7.4 | drug722  | -7.3 |
| drug531  | -7.3 | drug1044 | -7.4 | drug737  | -7.3 |
| drug535  | -7.3 | drug1140 | -7.4 | drug790  | -7.3 |

|          |      |          |      |          |      |
|----------|------|----------|------|----------|------|
| drug537  | -7.3 | drug1145 | -7.4 | drug795  | -7.3 |
| drug576  | -7.3 | drug1148 | -7.4 | drug808  | -7.3 |
| drug583  | -7.3 | drug1172 | -7.4 | drug810  | -7.3 |
| drug665  | -7.3 | drug1212 | -7.4 | drug813  | -7.3 |
| drug666  | -7.3 | drug1213 | -7.4 | drug849  | -7.3 |
| drug667  | -7.3 | drug1282 | -7.4 | drug867  | -7.3 |
| drug729  | -7.3 | drug1297 | -7.4 | drug868  | -7.3 |
| drug758  | -7.3 | drug1384 | -7.4 | drug895  | -7.3 |
| drug761  | -7.3 | drug1422 | -7.4 | drug900  | -7.3 |
| drug763  | -7.3 | drug1444 | -7.4 | drug908  | -7.3 |
| drug778  | -7.3 | drug1452 | -7.4 | drug912  | -7.3 |
| drug784  | -7.3 | drug1455 | -7.4 | drug947  | -7.3 |
| drug788  | -7.3 | drug1472 | -7.4 | drug1000 | -7.3 |
| drug806  | -7.3 | drug1485 | -7.4 | drug1002 | -7.3 |
| drug889  | -7.3 | drug3    | -7.3 | drug1032 | -7.3 |
| drug896  | -7.3 | drug8    | -7.3 | drug1036 | -7.3 |
| drug913  | -7.3 | drug11   | -7.3 | drug1045 | -7.3 |
| drug920  | -7.3 | drug14   | -7.3 | drug1047 | -7.3 |
| drug927  | -7.3 | drug75   | -7.3 | drug1065 | -7.3 |
| drug940  | -7.3 | drug137  | -7.3 | drug1072 | -7.3 |
| drug982  | -7.3 | drug156  | -7.3 | drug1078 | -7.3 |
| drug1010 | -7.3 | drug162  | -7.3 | drug1094 | -7.3 |
| drug1011 | -7.3 | drug199  | -7.3 | drug1103 | -7.3 |
| drug1015 | -7.3 | drug217  | -7.3 | drug1109 | -7.3 |
| drug1025 | -7.3 | drug364  | -7.3 | drug1142 | -7.3 |
| drug1036 | -7.3 | drug382  | -7.3 | drug1149 | -7.3 |
| drug1061 | -7.3 | drug399  | -7.3 | drug1167 | -7.3 |
| drug1159 | -7.3 | drug455  | -7.3 | drug1210 | -7.3 |
| drug1164 | -7.3 | drug483  | -7.3 | drug1245 | -7.3 |
| drug1192 | -7.3 | drug522  | -7.3 | drug1262 | -7.3 |
| drug1214 | -7.3 | drug527  | -7.3 | drug1290 | -7.3 |
| drug1247 | -7.3 | drug545  | -7.3 | drug1327 | -7.3 |
| drug1253 | -7.3 | drug567  | -7.3 | drug1377 | -7.3 |
| drug1265 | -7.3 | drug587  | -7.3 | drug1382 | -7.3 |
| drug1283 | -7.3 | drug628  | -7.3 | drug1393 | -7.3 |
| drug1291 | -7.3 | drug649  | -7.3 | drug1398 | -7.3 |
| drug1293 | -7.3 | drug671  | -7.3 | drug1415 | -7.3 |
| drug1324 | -7.3 | drug683  | -7.3 | drug1426 | -7.3 |
| drug1349 | -7.3 | drug742  | -7.3 | drug1447 | -7.3 |
| drug1354 | -7.3 | drug743  | -7.3 | drug1452 | -7.3 |
| drug1377 | -7.3 | drug750  | -7.3 | drug1472 | -7.3 |
| drug1398 | -7.3 | drug756  | -7.3 | drug1473 | -7.3 |
| drug1436 | -7.3 | drug777  | -7.3 | drug1499 | -7.3 |
| drug1445 | -7.3 | drug788  | -7.3 | drug49   | -7.2 |
| drug1449 | -7.3 | drug794  | -7.3 | drug84   | -7.2 |
| drug9    | -7.2 | drug805  | -7.3 | drug200  | -7.2 |
| drug43   | -7.2 | drug814  | -7.3 | drug303  | -7.2 |

|          |      |          |      |          |      |
|----------|------|----------|------|----------|------|
| drug70   | -7.2 | drug824  | -7.3 | drug316  | -7.2 |
| drug74   | -7.2 | drug825  | -7.3 | drug330  | -7.2 |
| drug90   | -7.2 | drug840  | -7.3 | drug360  | -7.2 |
| drug114  | -7.2 | drug845  | -7.3 | drug473  | -7.2 |
| drug121  | -7.2 | drug849  | -7.3 | drug509  | -7.2 |
| drug137  | -7.2 | drug850  | -7.3 | drug516  | -7.2 |
| drug143  | -7.2 | drug893  | -7.3 | drug607  | -7.2 |
| drug165  | -7.2 | drug931  | -7.3 | drug645  | -7.2 |
| drug210  | -7.2 | drug941  | -7.3 | drug663  | -7.2 |
| drug243  | -7.2 | drug953  | -7.3 | drug682  | -7.2 |
| drug262  | -7.2 | drug969  | -7.3 | drug693  | -7.2 |
| drug297  | -7.2 | drug1026 | -7.3 | drug759  | -7.2 |
| drug325  | -7.2 | drug1048 | -7.3 | drug783  | -7.2 |
| drug344  | -7.2 | drug1059 | -7.3 | drug787  | -7.2 |
| drug376  | -7.2 | drug1070 | -7.3 | drug788  | -7.2 |
| drug398  | -7.2 | drug1107 | -7.3 | drug835  | -7.2 |
| drug467  | -7.2 | drug1134 | -7.3 | drug845  | -7.2 |
| drug477  | -7.2 | drug1147 | -7.3 | drug872  | -7.2 |
| drug498  | -7.2 | drug1164 | -7.3 | drug889  | -7.2 |
| drug521  | -7.2 | drug1173 | -7.3 | drug893  | -7.2 |
| drug540  | -7.2 | drug1190 | -7.3 | drug897  | -7.2 |
| drug575  | -7.2 | drug1211 | -7.3 | drug921  | -7.2 |
| drug592  | -7.2 | drug1222 | -7.3 | drug922  | -7.2 |
| drug641  | -7.2 | drug1296 | -7.3 | drug954  | -7.2 |
| drug650  | -7.2 | drug1336 | -7.3 | drug960  | -7.2 |
| drug673  | -7.2 | drug1476 | -7.3 | drug973  | -7.2 |
| drug706  | -7.2 | drug70   | -7.2 | drug990  | -7.2 |
| drug719  | -7.2 | drug96   | -7.2 | drug1001 | -7.2 |
| drug751  | -7.2 | drug120  | -7.2 | drug1038 | -7.2 |
| drug790  | -7.2 | drug181  | -7.2 | drug1041 | -7.2 |
| drug808  | -7.2 | drug213  | -7.2 | drug1044 | -7.2 |
| drug812  | -7.2 | drug224  | -7.2 | drug1055 | -7.2 |
| drug814  | -7.2 | drug263  | -7.2 | drug1085 | -7.2 |
| drug860  | -7.2 | drug296  | -7.2 | drug1131 | -7.2 |
| drug865  | -7.2 | drug299  | -7.2 | drug1137 | -7.2 |
| drug881  | -7.2 | drug315  | -7.2 | drug1151 | -7.2 |
| drug906  | -7.2 | drug374  | -7.2 | drug1159 | -7.2 |
| drug914  | -7.2 | drug389  | -7.2 | drug1296 | -7.2 |
| drug957  | -7.2 | drug459  | -7.2 | drug1297 | -7.2 |
| drug991  | -7.2 | drug471  | -7.2 | drug1300 | -7.2 |
| drug1070 | -7.2 | drug529  | -7.2 | drug1322 | -7.2 |
| drug1103 | -7.2 | drug531  | -7.2 | drug1416 | -7.2 |
| drug1107 | -7.2 | drug553  | -7.2 | drug1455 | -7.2 |
| drug1151 | -7.2 | drug631  | -7.2 | drug1470 | -7.2 |
| drug1163 | -7.2 | drug636  | -7.2 | drug1485 | -7.2 |
| drug1181 | -7.2 | drug680  | -7.2 | drug86   | -7.1 |
| drug1220 | -7.2 | drug747  | -7.2 | drug93   | -7.1 |

|          |      |          |      |          |      |
|----------|------|----------|------|----------|------|
| drug1223 | -7.2 | drug751  | -7.2 | drug231  | -7.1 |
| drug1226 | -7.2 | drug786  | -7.2 | drug232  | -7.1 |
| drug1238 | -7.2 | drug791  | -7.2 | drug242  | -7.1 |
| drug1276 | -7.2 | drug792  | -7.2 | drug248  | -7.1 |
| drug1301 | -7.2 | drug798  | -7.2 | drug256  | -7.1 |
| drug1318 | -7.2 | drug807  | -7.2 | drug322  | -7.1 |
| drug1348 | -7.2 | drug822  | -7.2 | drug370  | -7.1 |
| drug1375 | -7.2 | drug827  | -7.2 | drug423  | -7.1 |
| drug1386 | -7.2 | drug833  | -7.2 | drug492  | -7.1 |
| drug1393 | -7.2 | drug843  | -7.2 | drug521  | -7.1 |
| drug1453 | -7.2 | drug861  | -7.2 | drug538  | -7.1 |
| drug1476 | -7.2 | drug885  | -7.2 | drug547  | -7.1 |
| drug1492 | -7.2 | drug895  | -7.2 | drug574  | -7.1 |
| drug1495 | -7.2 | drug1004 | -7.2 | drug575  | -7.1 |
| drug33   | -7.1 | drug1015 | -7.2 | drug582  | -7.1 |
| drug64   | -7.1 | drug1068 | -7.2 | drug649  | -7.1 |
| drug144  | -7.1 | drug1105 | -7.2 | drug687  | -7.1 |
| drug153  | -7.1 | drug1146 | -7.2 | drug697  | -7.1 |
| drug273  | -7.1 | drug1203 | -7.2 | drug699  | -7.1 |
| drug318  | -7.1 | drug1245 | -7.2 | drug726  | -7.1 |
| drug329  | -7.1 | drug1304 | -7.2 | drug728  | -7.1 |
| drug346  | -7.1 | drug1319 | -7.2 | drug756  | -7.1 |
| drug370  | -7.1 | drug1359 | -7.2 | drug807  | -7.1 |
| drug382  | -7.1 | drug1398 | -7.2 | drug840  | -7.1 |
| drug420  | -7.1 | drug1409 | -7.2 | drug887  | -7.1 |
| drug442  | -7.1 | drug1413 | -7.2 | drug896  | -7.1 |
| drug518  | -7.1 | drug1415 | -7.2 | drug933  | -7.1 |
| drug529  | -7.1 | drug1429 | -7.2 | drug934  | -7.1 |
| drug545  | -7.1 | drug1445 | -7.2 | drug970  | -7.1 |
| drug550  | -7.1 | drug31   | -7.1 | drug975  | -7.1 |
| drug573  | -7.1 | drug38   | -7.1 | drug985  | -7.1 |
| drug587  | -7.1 | drug76   | -7.1 | drug1012 | -7.1 |
| drug589  | -7.1 | drug242  | -7.1 | drug1035 | -7.1 |
| drug613  | -7.1 | drug265  | -7.1 | drug1037 | -7.1 |
| drug658  | -7.1 | drug306  | -7.1 | drug1091 | -7.1 |
| drug680  | -7.1 | drug355  | -7.1 | drug1213 | -7.1 |
| drug685  | -7.1 | drug358  | -7.1 | drug1253 | -7.1 |
| drug696  | -7.1 | drug359  | -7.1 | drug1276 | -7.1 |
| drug737  | -7.1 | drug396  | -7.1 | drug1277 | -7.1 |
| drug745  | -7.1 | drug428  | -7.1 | drug1278 | -7.1 |
| drug764  | -7.1 | drug538  | -7.1 | drug1298 | -7.1 |
| drug773  | -7.1 | drug547  | -7.1 | drug1332 | -7.1 |
| drug791  | -7.1 | drug564  | -7.1 | drug1437 | -7.1 |
| drug805  | -7.1 | drug582  | -7.1 | drug1481 | -7.1 |
| drug810  | -7.1 | drug619  | -7.1 | drug11   | -7   |
| drug849  | -7.1 | drug644  | -7.1 | drug70   | -7   |
| drug850  | -7.1 | drug688  | -7.1 | drug215  | -7   |

|          |      |          |      |          |      |
|----------|------|----------|------|----------|------|
| drug869  | -7.1 | drug705  | -7.1 | drug238  | -7   |
| drug895  | -7.1 | drug722  | -7.1 | drug244  | -7   |
| drug899  | -7.1 | drug778  | -7.1 | drug285  | -7   |
| drug911  | -7.1 | drug812  | -7.1 | drug376  | -7   |
| drug943  | -7.1 | drug854  | -7.1 | drug390  | -7   |
| drug945  | -7.1 | drug855  | -7.1 | drug399  | -7   |
| drug965  | -7.1 | drug863  | -7.1 | drug418  | -7   |
| drug974  | -7.1 | drug869  | -7.1 | drug435  | -7   |
| drug1008 | -7.1 | drug907  | -7.1 | drug503  | -7   |
| drug1016 | -7.1 | drug991  | -7.1 | drug553  | -7   |
| drug1035 | -7.1 | drug1049 | -7.1 | drug610  | -7   |
| drug1066 | -7.1 | drug1090 | -7.1 | drug680  | -7   |
| drug1083 | -7.1 | drug1108 | -7.1 | drug681  | -7   |
| drug1085 | -7.1 | drug1209 | -7.1 | drug684  | -7   |
| drug1152 | -7.1 | drug1244 | -7.1 | drug706  | -7   |
| drug1158 | -7.1 | drug1285 | -7.1 | drug711  | -7   |
| drug1161 | -7.1 | drug1301 | -7.1 | drug782  | -7   |
| drug1197 | -7.1 | drug1338 | -7.1 | drug789  | -7   |
| drug1205 | -7.1 | drug1345 | -7.1 | drug812  | -7   |
| drug1255 | -7.1 | drug1379 | -7.1 | drug822  | -7   |
| drug1260 | -7.1 | drug1387 | -7.1 | drug831  | -7   |
| drug1277 | -7.1 | drug1400 | -7.1 | drug839  | -7   |
| drug1290 | -7.1 | drug1416 | -7.1 | drug915  | -7   |
| drug1355 | -7.1 | drug6    | -7   | drug932  | -7   |
| drug1362 | -7.1 | drug65   | -7   | drug967  | -7   |
| drug1363 | -7.1 | drug72   | -7   | drug1011 | -7   |
| drug1419 | -7.1 | drug86   | -7   | drug1015 | -7   |
| drug1455 | -7.1 | drug135  | -7   | drug1025 | -7   |
| drug1461 | -7.1 | drug142  | -7   | drug1046 | -7   |
| drug1472 | -7.1 | drug144  | -7   | drug1075 | -7   |
| drug1499 | -7.1 | drug153  | -7   | drug1107 | -7   |
| drug22   | -7   | drug218  | -7   | drug1112 | -7   |
| drug38   | -7   | drug223  | -7   | drug1120 | -7   |
| drug146  | -7   | drug227  | -7   | drug1293 | -7   |
| drug175  | -7   | drug280  | -7   | drug1299 | -7   |
| drug181  | -7   | drug331  | -7   | drug1303 | -7   |
| drug214  | -7   | drug435  | -7   | drug1318 | -7   |
| drug218  | -7   | drug603  | -7   | drug1365 | -7   |
| drug227  | -7   | drug612  | -7   | drug1375 | -7   |
| drug241  | -7   | drug621  | -7   | drug1383 | -7   |
| drug276  | -7   | drug633  | -7   | drug1388 | -7   |
| drug277  | -7   | drug686  | -7   | drug1418 | -7   |
| drug290  | -7   | drug708  | -7   | drug1438 | -7   |
| drug304  | -7   | drug755  | -7   | drug1461 | -7   |
| drug383  | -7   | drug780  | -7   | drug94   | -6.9 |
| drug395  | -7   | drug782  | -7   | drug218  | -6.9 |
| drug459  | -7   | drug838  | -7   | drug299  | -6.9 |

|          |      |          |      |          |      |
|----------|------|----------|------|----------|------|
| drug530  | -7   | drug862  | -7   | drug307  | -6.9 |
| drug559  | -7   | drug872  | -7   | drug336  | -6.9 |
| drug630  | -7   | drug876  | -7   | drug371  | -6.9 |
| drug659  | -7   | drug890  | -7   | drug382  | -6.9 |
| drug660  | -7   | drug908  | -7   | drug397  | -6.9 |
| drug710  | -7   | drug942  | -7   | drug529  | -6.9 |
| drug759  | -7   | drug943  | -7   | drug621  | -6.9 |
| drug807  | -7   | drug992  | -7   | drug635  | -6.9 |
| drug824  | -7   | drug1009 | -7   | drug659  | -6.9 |
| drug839  | -7   | drug1016 | -7   | drug688  | -6.9 |
| drug931  | -7   | drug1091 | -7   | drug712  | -6.9 |
| drug934  | -7   | drug1095 | -7   | drug742  | -6.9 |
| drug1056 | -7   | drug1133 | -7   | drug781  | -6.9 |
| drug1059 | -7   | drug1135 | -7   | drug792  | -6.9 |
| drug1088 | -7   | drug1181 | -7   | drug806  | -6.9 |
| drug1090 | -7   | drug1265 | -7   | drug811  | -6.9 |
| drug1123 | -7   | drug1376 | -7   | drug880  | -6.9 |
| drug1142 | -7   | drug1395 | -7   | drug930  | -6.9 |
| drug1148 | -7   | drug1414 | -7   | drug946  | -6.9 |
| drug1165 | -7   | drug1440 | -7   | drug965  | -6.9 |
| drug1216 | -7   | drug1451 | -7   | drug969  | -6.9 |
| drug1217 | -7   | drug1463 | -7   | drug1009 | -6.9 |
| drug1219 | -7   | drug1482 | -7   | drug1014 | -6.9 |
| drug1229 | -7   | drug1495 | -7   | drug1059 | -6.9 |
| drug1242 | -7   | drug35   | -6.9 | drug1087 | -6.9 |
| drug1284 | -7   | drug145  | -6.9 | drug1088 | -6.9 |
| drug1378 | -7   | drug146  | -6.9 | drug1089 | -6.9 |
| drug1390 | -7   | drug255  | -6.9 | drug1108 | -6.9 |
| drug1396 | -7   | drug274  | -6.9 | drug1170 | -6.9 |
| drug1438 | -7   | drug292  | -6.9 | drug1173 | -6.9 |
| drug1450 | -7   | drug330  | -6.9 | drug1203 | -6.9 |
| drug1482 | -7   | drug356  | -6.9 | drug1206 | -6.9 |
| drug1483 | -7   | drug397  | -6.9 | drug1334 | -6.9 |
| drug1488 | -7   | drug445  | -6.9 | drug1360 | -6.9 |
| drug11   | -6.9 | drug477  | -6.9 | drug1445 | -6.9 |
| drug19   | -6.9 | drug490  | -6.9 | drug1449 | -6.9 |
| drug30   | -6.9 | drug530  | -6.9 | drug1482 | -6.9 |
| drug32   | -6.9 | drug559  | -6.9 | drug1498 | -6.9 |
| drug176  | -6.9 | drug589  | -6.9 | drug3    | -6.8 |
| drug213  | -6.9 | drug610  | -6.9 | drug8    | -6.8 |
| drug217  | -6.9 | drug639  | -6.9 | drug22   | -6.8 |
| drug221  | -6.9 | drug642  | -6.9 | drug30   | -6.8 |
| drug278  | -6.9 | drug673  | -6.9 | drug90   | -6.8 |
| drug285  | -6.9 | drug700  | -6.9 | drug97   | -6.8 |
| drug296  | -6.9 | drug720  | -6.9 | drug144  | -6.8 |
| drug298  | -6.9 | drug736  | -6.9 | drug145  | -6.8 |
| drug299  | -6.9 | drug804  | -6.9 | drug157  | -6.8 |



|          |      |          |      |          |      |
|----------|------|----------|------|----------|------|
| drug300  | -6.9 | drug909  | -6.9 | drug302  | -6.8 |
| drug312  | -6.9 | drug951  | -6.9 | drug338  | -6.8 |
| drug509  | -6.9 | drug960  | -6.9 | drug452  | -6.8 |
| drug516  | -6.9 | drug966  | -6.9 | drug483  | -6.8 |
| drug524  | -6.9 | drug1011 | -6.9 | drug522  | -6.8 |
| drug538  | -6.9 | drug1022 | -6.9 | drug526  | -6.8 |
| drug544  | -6.9 | drug1024 | -6.9 | drug559  | -6.8 |
| drug548  | -6.9 | drug1035 | -6.9 | drug601  | -6.8 |
| drug643  | -6.9 | drug1047 | -6.9 | drug636  | -6.8 |
| drug649  | -6.9 | drug1086 | -6.9 | drug655  | -6.8 |
| drug689  | -6.9 | drug1118 | -6.9 | drug685  | -6.8 |
| drug690  | -6.9 | drug1123 | -6.9 | drug707  | -6.8 |
| drug712  | -6.9 | drug1128 | -6.9 | drug743  | -6.8 |
| drug752  | -6.9 | drug1149 | -6.9 | drug815  | -6.8 |
| drug811  | -6.9 | drug1163 | -6.9 | drug913  | -6.8 |
| drug816  | -6.9 | drug1197 | -6.9 | drug914  | -6.8 |
| drug825  | -6.9 | drug1221 | -6.9 | drug945  | -6.8 |
| drug826  | -6.9 | drug1223 | -6.9 | drug962  | -6.8 |
| drug845  | -6.9 | drug1229 | -6.9 | drug979  | -6.8 |
| drug900  | -6.9 | drug1286 | -6.9 | drug983  | -6.8 |
| drug962  | -6.9 | drug1312 | -6.9 | drug991  | -6.8 |
| drug1004 | -6.9 | drug1346 | -6.9 | drug1034 | -6.8 |
| drug1071 | -6.9 | drug1361 | -6.9 | drug1147 | -6.8 |
| drug1072 | -6.9 | drug1389 | -6.9 | drug1172 | -6.8 |
| drug1087 | -6.9 | drug1391 | -6.9 | drug1205 | -6.8 |
| drug1106 | -6.9 | drug1426 | -6.9 | drug1237 | -6.8 |
| drug1112 | -6.9 | drug1447 | -6.9 | drug1260 | -6.8 |
| drug1124 | -6.9 | drug1448 | -6.9 | drug1265 | -6.8 |
| drug1135 | -6.9 | drug1462 | -6.9 | drug1285 | -6.8 |
| drug1224 | -6.9 | drug1464 | -6.9 | drug1301 | -6.8 |
| drug1259 | -6.9 | drug1487 | -6.9 | drug1329 | -6.8 |
| drug1342 | -6.9 | drug1497 | -6.9 | drug1390 | -6.8 |
| drug1360 | -6.9 | drug49   | -6.8 | drug1450 | -6.8 |
| drug1364 | -6.9 | drug64   | -6.8 | drug1453 | -6.8 |
| drug1383 | -6.9 | drug108  | -6.8 | drug1462 | -6.8 |
| drug1388 | -6.9 | drug130  | -6.8 | drug1483 | -6.8 |
| drug1392 | -6.9 | drug143  | -6.8 | drug6    | -6.7 |
| drug1481 | -6.9 | drug175  | -6.8 | drug7    | -6.7 |
| drug8    | -6.8 | drug318  | -6.8 | drug45   | -6.7 |
| drug35   | -6.8 | drug329  | -6.8 | drug91   | -6.7 |
| drug49   | -6.8 | drug336  | -6.8 | drug96   | -6.7 |
| drug91   | -6.8 | drug390  | -6.8 | drug154  | -6.7 |
| drug120  | -6.8 | drug500  | -6.8 | drug159  | -6.7 |
| drug156  | -6.8 | drug514  | -6.8 | drug165  | -6.7 |
| drug157  | -6.8 | drug566  | -6.8 | drug177  | -6.7 |
| drug167  | -6.8 | drug568  | -6.8 | drug271  | -6.7 |
| drug215  | -6.8 | drug570  | -6.8 | drug294  | -6.7 |

|          |      |          |      |          |      |
|----------|------|----------|------|----------|------|
| drug223  | -6.8 | drug571  | -6.8 | drug321  | -6.7 |
| drug244  | -6.8 | drug635  | -6.8 | drug348  | -6.7 |
| drug280  | -6.8 | drug675  | -6.8 | drug358  | -6.7 |
| drug314  | -6.8 | drug690  | -6.8 | drug412  | -6.7 |
| drug315  | -6.8 | drug707  | -6.8 | drug454  | -6.7 |
| drug354  | -6.8 | drug715  | -6.8 | drug542  | -6.7 |
| drug360  | -6.8 | drug797  | -6.8 | drug565  | -6.7 |
| drug389  | -6.8 | drug813  | -6.8 | drug570  | -6.7 |
| drug423  | -6.8 | drug913  | -6.8 | drug739  | -6.7 |
| drug433  | -6.8 | drug914  | -6.8 | drug763  | -6.7 |
| drug483  | -6.8 | drug933  | -6.8 | drug785  | -6.7 |
| drug490  | -6.8 | drug982  | -6.8 | drug786  | -6.7 |
| drug514  | -6.8 | drug984  | -6.8 | drug798  | -6.7 |
| drug525  | -6.8 | drug988  | -6.8 | drug805  | -6.7 |
| drug553  | -6.8 | drug1008 | -6.8 | drug841  | -6.7 |
| drug642  | -6.8 | drug1071 | -6.8 | drug853  | -6.7 |
| drug684  | -6.8 | drug1096 | -6.8 | drug854  | -6.7 |
| drug693  | -6.8 | drug1109 | -6.8 | drug863  | -6.7 |
| drug697  | -6.8 | drug1112 | -6.8 | drug869  | -6.7 |
| drug707  | -6.8 | drug1130 | -6.8 | drug916  | -6.7 |
| drug711  | -6.8 | drug1309 | -6.8 | drug952  | -6.7 |
| drug717  | -6.8 | drug1318 | -6.8 | drug955  | -6.7 |
| drug739  | -6.8 | drug1329 | -6.8 | drug1083 | -6.7 |
| drug831  | -6.8 | drug1350 | -6.8 | drug1096 | -6.7 |
| drug840  | -6.8 | drug1388 | -6.8 | drug1106 | -6.7 |
| drug843  | -6.8 | drug1393 | -6.8 | drug1128 | -6.7 |
| drug853  | -6.8 | drug1479 | -6.8 | drug1135 | -6.7 |
| drug863  | -6.8 | drug1486 | -6.8 | drug1197 | -6.7 |
| drug870  | -6.8 | drug1498 | -6.8 | drug1302 | -6.7 |
| drug946  | -6.8 | drug106  | -6.7 | drug1305 | -6.7 |
| drug954  | -6.8 | drug202  | -6.7 | drug1338 | -6.7 |
| drug961  | -6.8 | drug262  | -6.7 | drug1361 | -6.7 |
| drug969  | -6.8 | drug277  | -6.7 | drug1362 | -6.7 |
| drug983  | -6.8 | drug283  | -6.7 | drug1392 | -6.7 |
| drug1022 | -6.8 | drug285  | -6.7 | drug1414 | -6.7 |
| drug1046 | -6.8 | drug297  | -6.7 | drug1432 | -6.7 |
| drug1055 | -6.8 | drug423  | -6.7 | drug1476 | -6.7 |
| drug1086 | -6.8 | drug452  | -6.7 | drug1492 | -6.7 |
| drug1089 | -6.8 | drug468  | -6.7 | drug31   | -6.6 |
| drug1091 | -6.8 | drug492  | -6.7 | drug32   | -6.6 |
| drug1096 | -6.8 | drug540  | -6.7 | drug130  | -6.6 |
| drug1149 | -6.8 | drug541  | -6.7 | drug280  | -6.6 |
| drug1314 | -6.8 | drug590  | -6.7 | drug298  | -6.6 |
| drug1329 | -6.8 | drug712  | -6.7 | drug372  | -6.6 |
| drug1338 | -6.8 | drug725  | -6.7 | drug459  | -6.6 |
| drug1391 | -6.8 | drug735  | -6.7 | drug468  | -6.6 |
| drug1479 | -6.8 | drug781  | -6.7 | drug525  | -6.6 |

|          |      |          |      |          |      |
|----------|------|----------|------|----------|------|
| drug13   | -6.7 | drug787  | -6.7 | drug571  | -6.6 |
| drug34   | -6.7 | drug815  | -6.7 | drug590  | -6.6 |
| drug63   | -6.7 | drug828  | -6.7 | drug642  | -6.6 |
| drug65   | -6.7 | drug836  | -6.7 | drug673  | -6.6 |
| drug67   | -6.7 | drug922  | -6.7 | drug675  | -6.6 |
| drug76   | -6.7 | drug925  | -6.7 | drug690  | -6.6 |
| drug133  | -6.7 | drug958  | -6.7 | drug801  | -6.6 |
| drug145  | -6.7 | drug993  | -6.7 | drug907  | -6.6 |
| drug160  | -6.7 | drug1000 | -6.7 | drug909  | -6.6 |
| drug162  | -6.7 | drug1034 | -6.7 | drug951  | -6.6 |
| drug177  | -6.7 | drug1050 | -6.7 | drug966  | -6.6 |
| drug205  | -6.7 | drug1201 | -6.7 | drug982  | -6.6 |
| drug283  | -6.7 | drug1334 | -6.7 | drug984  | -6.6 |
| drug284  | -6.7 | drug1342 | -6.7 | drug1056 | -6.6 |
| drug293  | -6.7 | drug1363 | -6.7 | drug1058 | -6.6 |
| drug322  | -6.7 | drug1390 | -6.7 | drug1068 | -6.6 |
| drug401  | -6.7 | drug1450 | -6.7 | drug1074 | -6.6 |
| drug412  | -6.7 | drug1481 | -6.7 | drug1123 | -6.6 |
| drug427  | -6.7 | drug19   | -6.6 | drug1124 | -6.6 |
| drug452  | -6.7 | drug67   | -6.6 | drug1130 | -6.6 |
| drug455  | -6.7 | drug194  | -6.6 | drug1146 | -6.6 |
| drug526  | -6.7 | drug271  | -6.6 | drug1162 | -6.6 |
| drug755  | -6.7 | drug357  | -6.6 | drug1163 | -6.6 |
| drug792  | -6.7 | drug360  | -6.6 | drug1235 | -6.6 |
| drug796  | -6.7 | drug372  | -6.6 | drug1239 | -6.6 |
| drug804  | -6.7 | drug454  | -6.6 | drug1259 | -6.6 |
| drug828  | -6.7 | drug528  | -6.6 | drug1326 | -6.6 |
| drug858  | -6.7 | drug569  | -6.6 | drug1378 | -6.6 |
| drug923  | -6.7 | drug665  | -6.6 | drug1389 | -6.6 |
| drug929  | -6.7 | drug689  | -6.6 | drug1391 | -6.6 |
| drug960  | -6.7 | drug713  | -6.6 | drug1395 | -6.6 |
| drug967  | -6.7 | drug785  | -6.6 | drug1419 | -6.6 |
| drug970  | -6.7 | drug789  | -6.6 | drug1451 | -6.6 |
| drug1172 | -6.7 | drug891  | -6.6 | drug1463 | -6.6 |
| drug1210 | -6.7 | drug892  | -6.6 | drug1464 | -6.6 |
| drug1213 | -6.7 | drug952  | -6.6 | drug1479 | -6.6 |
| drug1215 | -6.7 | drug957  | -6.6 | drug1495 | -6.6 |
| drug1243 | -6.7 | drug1056 | -6.6 | drug64   | -6.5 |
| drug1245 | -6.7 | drug1072 | -6.6 | drug162  | -6.5 |
| drug1312 | -6.7 | drug1083 | -6.6 | drug175  | -6.5 |
| drug1395 | -6.7 | drug1087 | -6.6 | drug196  | -6.5 |
| drug1426 | -6.7 | drug1088 | -6.6 | drug202  | -6.5 |
| drug1443 | -6.7 | drug1132 | -6.6 | drug239  | -6.5 |
| drug1451 | -6.7 | drug1162 | -6.6 | drug283  | -6.5 |
| drug1462 | -6.7 | drug1167 | -6.6 | drug431  | -6.5 |
| drug1480 | -6.7 | drug1191 | -6.6 | drug433  | -6.5 |
| drug2    | -6.6 | drug1243 | -6.6 | drug530  | -6.5 |

|          |      |          |      |          |      |
|----------|------|----------|------|----------|------|
| drug4    | -6.6 | drug1322 | -6.6 | drug594  | -6.5 |
| drug105  | -6.6 | drug1341 | -6.6 | drug603  | -6.5 |
| drug161  | -6.6 | drug1374 | -6.6 | drug780  | -6.5 |
| drug196  | -6.6 | drug1406 | -6.6 | drug816  | -6.5 |
| drug242  | -6.6 | drug1407 | -6.6 | drug858  | -6.5 |
| drug263  | -6.6 | drug1483 | -6.6 | drug1175 | -6.5 |
| drug292  | -6.6 | drug9    | -6.5 | drug1201 | -6.5 |
| drug330  | -6.6 | drug15   | -6.5 | drug1223 | -6.5 |
| drug454  | -6.6 | drug32   | -6.5 | drug1254 | -6.5 |
| drug468  | -6.6 | drug45   | -6.5 | drug1255 | -6.5 |
| drug647  | -6.6 | drug66   | -6.5 | drug1284 | -6.5 |
| drug664  | -6.6 | drug105  | -6.5 | drug1342 | -6.5 |
| drug671  | -6.6 | drug177  | -6.5 | drug1413 | -6.5 |
| drug727  | -6.6 | drug284  | -6.5 | drug4    | -6.4 |
| drug728  | -6.6 | drug294  | -6.5 | drug5    | -6.4 |
| drug800  | -6.6 | drug300  | -6.5 | drug214  | -6.4 |
| drug813  | -6.6 | drug311  | -6.5 | drug296  | -6.4 |
| drug915  | -6.6 | drug321  | -6.5 | drug378  | -6.4 |
| drug930  | -6.6 | drug378  | -6.5 | drug432  | -6.4 |
| drug932  | -6.6 | drug467  | -6.5 | drug434  | -6.4 |
| drug953  | -6.6 | drug525  | -6.5 | drug477  | -6.4 |
| drug1044 | -6.6 | drug542  | -6.5 | drug531  | -6.4 |
| drug1075 | -6.6 | drug580  | -6.5 | drug566  | -6.4 |
| drug1128 | -6.6 | drug598  | -6.5 | drug602  | -6.4 |
| drug1130 | -6.6 | drug647  | -6.5 | drug670  | -6.4 |
| drug1306 | -6.6 | drug657  | -6.5 | drug804  | -6.4 |
| drug1361 | -6.6 | drug664  | -6.5 | drug838  | -6.4 |
| drug1389 | -6.6 | drug685  | -6.5 | drug862  | -6.4 |
| drug1463 | -6.6 | drug718  | -6.5 | drug942  | -6.4 |
| drug3    | -6.5 | drug724  | -6.5 | drug944  | -6.4 |
| drug5    | -6.5 | drug803  | -6.5 | drug953  | -6.4 |
| drug14   | -6.5 | drug811  | -6.5 | drug1050 | -6.4 |
| drug51   | -6.5 | drug823  | -6.5 | drug1086 | -6.4 |
| drug108  | -6.5 | drug879  | -6.5 | drug1104 | -6.4 |
| drug123  | -6.5 | drug888  | -6.5 | drug1157 | -6.4 |
| drug159  | -6.5 | drug915  | -6.5 | drug1158 | -6.4 |
| drug240  | -6.5 | drug944  | -6.5 | drug1497 | -6.4 |
| drug256  | -6.5 | drug949  | -6.5 | drug15   | -6.3 |
| drug286  | -6.5 | drug954  | -6.5 | drug76   | -6.3 |
| drug316  | -6.5 | drug1001 | -6.5 | drug128  | -6.3 |
| drug328  | -6.5 | drug1227 | -6.5 | drug137  | -6.3 |
| drug422  | -6.5 | drug1259 | -6.5 | drug142  | -6.3 |
| drug431  | -6.5 | drug1305 | -6.5 | drug143  | -6.3 |
| drug491  | -6.5 | drug1316 | -6.5 | drug181  | -6.3 |
| drug492  | -6.5 | drug1360 | -6.5 | drug224  | -6.3 |
| drug560  | -6.5 | drug1380 | -6.5 | drug227  | -6.3 |
| drug564  | -6.5 | drug1392 | -6.5 | drug254  | -6.3 |

|          |      |          |      |          |      |
|----------|------|----------|------|----------|------|
| drug598  | -6.5 | drug1432 | -6.5 | drug278  | -6.3 |
| drug610  | -6.5 | drug1480 | -6.5 | drug455  | -6.3 |
| drug612  | -6.5 | drug7    | -6.4 | drug491  | -6.3 |
| drug663  | -6.5 | drug13   | -6.4 | drug514  | -6.3 |
| drug803  | -6.5 | drug17   | -6.4 | drug528  | -6.3 |
| drug815  | -6.5 | drug51   | -6.4 | drug554  | -6.3 |
| drug838  | -6.5 | drug123  | -6.4 | drug560  | -6.3 |
| drug880  | -6.5 | drug158  | -6.4 | drug569  | -6.3 |
| drug897  | -6.5 | drug198  | -6.4 | drug597  | -6.3 |
| drug979  | -6.5 | drug221  | -6.4 | drug665  | -6.3 |
| drug992  | -6.5 | drug222  | -6.4 | drug809  | -6.3 |
| drug1014 | -6.5 | drug225  | -6.4 | drug823  | -6.3 |
| drug1041 | -6.5 | drug237  | -6.4 | drug833  | -6.3 |
| drug1108 | -6.5 | drug253  | -6.4 | drug861  | -6.3 |
| drug1173 | -6.5 | drug264  | -6.4 | drug903  | -6.3 |
| drug1228 | -6.5 | drug377  | -6.4 | drug1246 | -6.3 |
| drug1297 | -6.5 | drug434  | -6.4 | drug1341 | -6.3 |
| drug1305 | -6.5 | drug573  | -6.4 | drug1440 | -6.3 |
| drug1334 | -6.5 | drug594  | -6.4 | drug1480 | -6.3 |
| drug1464 | -6.5 | drug790  | -6.4 | drug9    | -6.2 |
| drug17   | -6.4 | drug809  | -6.4 | drug13   | -6.2 |
| drug45   | -6.4 | drug842  | -6.4 | drug19   | -6.2 |
| drug96   | -6.4 | drug923  | -6.4 | drug35   | -6.2 |
| drug106  | -6.4 | drug967  | -6.4 | drug65   | -6.2 |
| drug116  | -6.4 | drug983  | -6.4 | drug105  | -6.2 |
| drug128  | -6.4 | drug1003 | -6.4 | drug146  | -6.2 |
| drug142  | -6.4 | drug1064 | -6.4 | drug158  | -6.2 |
| drug158  | -6.4 | drug1124 | -6.4 | drug222  | -6.2 |
| drug274  | -6.4 | drug1224 | -6.4 | drug223  | -6.2 |
| drug294  | -6.4 | drug1228 | -6.4 | drug241  | -6.2 |
| drug357  | -6.4 | drug1246 | -6.4 | drug262  | -6.2 |
| drug434  | -6.4 | drug4    | -6.3 | drug284  | -6.2 |
| drug541  | -6.4 | drug5    | -6.3 | drug300  | -6.2 |
| drug542  | -6.4 | drug37   | -6.3 | drug328  | -6.2 |
| drug566  | -6.4 | drug116  | -6.3 | drug349  | -6.2 |
| drug594  | -6.4 | drug122  | -6.3 | drug413  | -6.2 |
| drug654  | -6.4 | drug128  | -6.3 | drug475  | -6.2 |
| drug708  | -6.4 | drug133  | -6.3 | drug490  | -6.2 |
| drug724  | -6.4 | drug154  | -6.3 | drug541  | -6.2 |
| drug787  | -6.4 | drug160  | -6.3 | drug555  | -6.2 |
| drug854  | -6.4 | drug226  | -6.3 | drug633  | -6.2 |
| drug951  | -6.4 | drug240  | -6.3 | drug664  | -6.2 |
| drug993  | -6.4 | drug249  | -6.3 | drug683  | -6.2 |
| drug999  | -6.4 | drug348  | -6.3 | drug708  | -6.2 |
| drug1058 | -6.4 | drug402  | -6.3 | drug724  | -6.2 |
| drug1104 | -6.4 | drug426  | -6.3 | drug857  | -6.2 |
| drug1246 | -6.4 | drug431  | -6.3 | drug949  | -6.2 |

|          |      |          |      |          |      |
|----------|------|----------|------|----------|------|
| drug1457 | -6.4 | drug433  | -6.3 | drug993  | -6.2 |
| drug6    | -6.3 | drug539  | -6.3 | drug999  | -6.2 |
| drug7    | -6.3 | drug727  | -6.3 | drug1319 | -6.2 |
| drug15   | -6.3 | drug783  | -6.3 | drug1400 | -6.2 |
| drug132  | -6.3 | drug841  | -6.3 | drug1407 | -6.2 |
| drug154  | -6.3 | drug859  | -6.3 | drug1494 | -6.2 |
| drug194  | -6.3 | drug1013 | -6.3 | drug14   | -6.1 |
| drug202  | -6.3 | drug1352 | -6.3 | drug38   | -6.1 |
| drug211  | -6.3 | drug1437 | -6.3 | drug51   | -6.1 |
| drug222  | -6.3 | drug1484 | -6.3 | drug153  | -6.1 |
| drug271  | -6.3 | drug34   | -6.2 | drug195  | -6.1 |
| drug311  | -6.3 | drug161  | -6.2 | drug221  | -6.1 |
| drug358  | -6.3 | drug163  | -6.2 | drug240  | -6.1 |
| drug372  | -6.3 | drug205  | -6.2 | drug255  | -6.1 |
| drug554  | -6.3 | drug254  | -6.2 | drug424  | -6.1 |
| drug595  | -6.3 | drug258  | -6.2 | drug515  | -6.1 |
| drug725  | -6.3 | drug273  | -6.2 | drug561  | -6.1 |
| drug842  | -6.3 | drug278  | -6.2 | drug595  | -6.1 |
| drug879  | -6.3 | drug412  | -6.2 | drug689  | -6.1 |
| drug925  | -6.3 | drug427  | -6.2 | drug700  | -6.1 |
| drug1009 | -6.3 | drug472  | -6.2 | drug718  | -6.1 |
| drug1013 | -6.3 | drug504  | -6.2 | drug797  | -6.1 |
| drug1034 | -6.3 | drug515  | -6.2 | drug802  | -6.1 |
| drug1068 | -6.3 | drug560  | -6.2 | drug803  | -6.1 |
| drug1157 | -6.3 | drug575  | -6.2 | drug859  | -6.1 |
| drug1201 | -6.3 | drug597  | -6.2 | drug1003 | -6.1 |
| drug1235 | -6.3 | drug772  | -6.2 | drug1090 | -6.1 |
| drug1341 | -6.3 | drug802  | -6.2 | drug1316 | -6.1 |
| drug1494 | -6.3 | drug857  | -6.2 | drug66   | -6   |
| drug37   | -6.2 | drug902  | -6.2 | drug67   | -6   |
| drug66   | -6.2 | drug903  | -6.2 | drug106  | -6   |
| drug195  | -6.2 | drug932  | -6.2 | drug108  | -6   |
| drug224  | -6.2 | drug959  | -6.2 | drug122  | -6   |
| drug249  | -6.2 | drug1054 | -6.2 | drug123  | -6   |
| drug255  | -6.2 | drug1080 | -6.2 | drug132  | -6   |
| drug390  | -6.2 | drug1089 | -6.2 | drug156  | -6   |
| drug396  | -6.2 | drug1157 | -6.2 | drug163  | -6   |
| drug432  | -6.2 | drug1234 | -6.2 | drug176  | -6   |
| drug515  | -6.2 | drug1264 | -6.2 | drug205  | -6   |
| drug590  | -6.2 | drug1290 | -6.2 | drug217  | -6   |
| drug670  | -6.2 | drug1314 | -6.2 | drug237  | -6   |
| drug683  | -6.2 | drug1375 | -6.2 | drug249  | -6   |
| drug742  | -6.2 | drug1423 | -6.2 | drug263  | -6   |
| drug772  | -6.2 | drug1443 | -6.2 | drug297  | -6   |
| drug802  | -6.2 | drug63   | -6.1 | drug377  | -6   |
| drug835  | -6.2 | drug241  | -6.1 | drug425  | -6   |
| drug1003 | -6.2 | drug287  | -6.1 | drug467  | -6   |

|          |      |          |      |          |      |
|----------|------|----------|------|----------|------|
| drug1024 | -6.2 | drug354  | -6.1 | drug552  | -6   |
| drug1326 | -6.2 | drug491  | -6.1 | drug612  | -6   |
| drug122  | -6.1 | drug561  | -6.1 | drug613  | -6   |
| drug252  | -6.1 | drug889  | -6.1 | drug657  | -6   |
| drug337  | -6.1 | drug979  | -6.1 | drug686  | -6   |
| drug539  | -6.1 | drug1017 | -6.1 | drug725  | -6   |
| drug561  | -6.1 | drug1055 | -6.1 | drug902  | -6   |
| drug682  | -6.1 | drug1058 | -6.1 | drug923  | -6   |
| drug785  | -6.1 | drug1175 | -6.1 | drug925  | -6   |
| drug841  | -6.1 | drug1235 | -6.1 | drug1013 | -6   |
| drug857  | -6.1 | drug1353 | -6.1 | drug1306 | -6   |
| drug1017 | -6.1 | drug2    | -6   | drug1314 | -6   |
| drug1316 | -6.1 | drug167  | -6   | drug1443 | -6   |
| drug225  | -6   | drug196  | -6   | drug63   | -5.9 |
| drug226  | -6   | drug425  | -6   | drug116  | -5.9 |
| drug239  | -6   | drug432  | -6   | drug194  | -5.9 |
| drug254  | -6   | drug516  | -6   | drug203  | -5.9 |
| drug258  | -6   | drug672  | -6   | drug213  | -5.9 |
| drug377  | -6   | drug1158 | -6   | drug258  | -5.9 |
| drug413  | -6   | drug1260 | -6   | drug426  | -5.9 |
| drug528  | -6   | drug1419 | -6   | drug539  | -5.9 |
| drug555  | -6   | drug1494 | -6   | drug800  | -5.9 |
| drug596  | -6   | drug132  | -5.9 | drug828  | -5.9 |
| drug672  | -6   | drug176  | -5.9 | drug992  | -5.9 |
| drug686  | -6   | drug195  | -5.9 | drug1024 | -5.8 |
| drug700  | -6   | drug203  | -5.9 | drug1228 | -5.8 |
| drug903  | -6   | drug239  | -5.9 | drug1229 | -5.8 |
| drug966  | -6   | drug413  | -5.9 | drug16   | -5.7 |
| drug1319 | -6   | drug554  | -5.9 | drug37   | -5.7 |
| drug1432 | -6   | drug595  | -5.9 | drug161  | -5.7 |
| drug163  | -5.9 | drug670  | -5.9 | drug167  | -5.7 |
| drug253  | -5.9 | drug800  | -5.9 | drug253  | -5.7 |
| drug295  | -5.9 | drug816  | -5.9 | drug311  | -5.7 |
| drug349  | -5.9 | drug999  | -5.9 | drug357  | -5.7 |
| drug475  | -5.9 | drug1362 | -5.9 | drug396  | -5.7 |
| drug718  | -5.9 | drug16   | -5.8 | drug842  | -5.7 |
| drug789  | -5.9 | drug91   | -5.8 | drug2    | -5.6 |
