# Supplementary material for: Repurposing Anti-Dengue Compounds against Monkeypox Virus Targeting Core Cysteine Protease
Source: Biomedicines. 2023 Jul 18;11(7):2025. doi: 10.3390/biomedicines11072025 (PMC10377189; doi:10.3390/biomedicines11072025)
Supplement: Supplementary file 1 [file biomedicines-11-02025-s001.zip › Supplementary_File_2.xlsx]

## Sheet: Sheet1
Chembl_ID	Smiles		Chembl_ID	Smiles		Chembl_ID	Smiles
CHEMBL104279	Cn1cc(/C=C2\C(=O)Nc3ccc(S(N)(=O)=O)cc32)c2ccccc21		CHEMBL3426545	O=C1CC2(C(=O)Nc3ccc(Cl)cc32)c2cnn(Cc3ccccc3Cl)c2N1		CHEMBL4646275	O=C1CC2(C(=O)Nc3ccc(Cl)cc32)c2cnn(Cc3ccc(C(F)(F)F)cc3C(F)(F)F)c2N1
CHEMBL470184	Nc1ncnc2c([C@H]3CC[C@@H](CO)O3)scc12		CHEMBL2064302	CO[C@H](CO)[C@H](NCCCn1cnc2c(NCc3ccccc3)ncnc21)c1ccc(C(C)C)cc1		CHEMBL4791328	COc1cc(Nc2ncnc3cc(C(F)(F)F)ccc23)cc(OC)c1OC
CHEMBL574190	CCN(CCCN(CC)C(=O)c1ccc(O)cc1)C(=O)c1ccc(O)cc1		CHEMBL2064296	CC(C)N1C(=O)[C@H](CCn2cnc3c(NCc4ccccc4)ncnc32)[C@H]1c1ccccc1		CHEMBL4793414	COc1ccc2c(Nc3cc(OC)c(OC)c(OC)c3)ncnc2c1
CHEMBL2163419	OC[C@@H]1[C@@H](O)[C@H](O)[C@@H](O)CN1CCCCCCOc1cccc(F)c1		CHEMBL3426580	O=C1CC2(C(=O)Nc3ccc(Cl)cc32)c2cnn(CC3CCC(F)(F)CC3)c2N1		CHEMBL4744568	COc1cc(Nc2ccnc3ccc(F)cc23)cc(OC)c1OC
CHEMBL2165944	OC[C@@H]1[C@@H](O)[C@H](O)[C@@H](O)CN1CCCCCCOC1CCCCCC1		CHEMBL2403288	O=c1ccn([C@H]2C[C@H](OC(c3ccccc3)(c3ccccc3)c3ccccc3)[C@@H](CO)O2)c(=O)[nH]1		CHEMBL4556662	COc1cc(Nc2ccnc3ccc(Cl)cc23)cc(OC)c1OC
CHEMBL574855	CN(CCCNC(=O)c1ccc(O)cc1)CCCNC(=O)c1ccc(O)cc1		CHEMBL4170643	COc1cc(-c2cnc3c(N4CC5CCC(C4)O5)snc3c2)ccc1N		CHEMBL4747332	COc1cc(Nc2c(C#N)cnc3cc(Cl)ccc23)cc(OC)c1OC
CHEMBL2348381	CC(=O)N(CCCCCCN1C[C@H](O)[C@@H](O)[C@H](O)[C@H]1CO)C1CCCCC1		CHEMBL4167311	COc1cc(-c2cnc3c(N4CCC(C(N)=O)CC4)snc3c2)ccc1N		CHEMBL4081376	N=C(N)NCCC[C@@H]1NC(=O)[C@H](CCCNC(=N)N)NC(=O)[C@@H](CCCNC(=N)N)NC(=O)[C@@H](Cc2ccccc2)NC(=O)[C@H](Cc2cccc3ccccc23)NC(=O)[C@H](CCc2ccccc2)NC(=O)[C@H](CO)NC(=O)[C@H](CCCCN)NC1=O
CHEMBL2348372	CC(C)(C)C(=O)N(CCCCCCN1C[C@H](O)[C@@H](O)[C@H](O)[C@H]1CO)C1CCCCCCC1		CHEMBL4175117	COc1cc(-c2cnc3c(N4CC5(COC5)C4)snc3c2)ccc1N		CHEMBL4061079	N=C(N)NCCC[C@@H]1NC(=O)[C@H](CCCNC(=N)N)NC(=O)[C@H]2CCCN2C(=O)[C@@H](Cc2ccccc2)NC(=O)[C@H](CO)NC(=O)[C@H](Cc2ccc(-c3ccccc3)cc2)NC(=O)[C@H](CO)NC(=O)[C@H](CCCCN)NC1=O
CHEMBL507341	O=c1[nH]cnc2c([C@@H]3O[C@H](CO)[C@@H](O)[C@H]3O)scc12		CHEMBL2064287	O=C1[C@@H](OCc2ccccc2)[C@@H](c2ccccc2)N1CCn1cnc2c(NCc3ccccc3)ncnc21		CHEMBL4061339	C=CC(=O)Nc1cc(-n2c(=O)ccc3cnc4ccc(-c5cnn(C)c5)cc4c32)ccc1F
CHEMBL2064298	O=C1[C@@H](Oc2ccccc2)[C@@H](c2ccc(Cl)cc2)N1CCn1cnc2c(NCc3ccccc3)ncnc21		CHEMBL343543	COc1cccc2nc(N)nc(N)c12		CHEMBL4288319	O=C(OC1=CS(=O)(=O)Nc2ccc(Oc3ccccc3Br)cc21)c1ccc(F)c(F)c1
CHEMBL2348373	CC(C)(C)C(=O)N(CCCCCCN1C[C@H](O)[C@@H](O)[C@H](O)[C@H]1CO)C1CCCCCC1		CHEMBL342595	Nc1nc(N)c2c(OCc3ccccc3)cccc2n1		CHEMBL4531719	CCCCc1cn(-c2ccc(NC(=O)Nc3ccccc3C)cc2)nn1
CHEMBL3637933	OC[C@H]1O[C@@H](n2c3ccc(Cl)cc3c3c(-c4cc5ccccc5o4)ncnc32)C(O)[C@H]1O		CHEMBL2042327	CC(C)(C)S(=O)(=O)c1cccc2nc(N)nc(N)c12		CHEMBL4636692	O=C(N[C@@H](CO)C(=O)O)c1cc(-c2ccccc2)c(=O)n2c1sc1ccc(OC3CCCCC3)cc12
CHEMBL4081268	Nc1ncc(Br)c2c1ncn2[C@@H]1[C@@H](O)[C@@H](O)[C@H]2C[C@H]21		CHEMBL2042321	CC(C)(C)Oc1cccc2nc(N)nc(N)c12		CHEMBL4752943	COc1cc(Nc2ccnc3cc(F)ccc23)cc(OC)c1OC
CHEMBL4101868	Nc1nccc2c1ncn2[C@@H]1[C@@H](O)[C@@H](O)[C@H]2C[C@H]21		CHEMBL2146944	OC[C@H]1O[C@@H](n2c3ccc(-c4ccoc4)cc3c3c(-c4ccco4)ncnc32)[C@H](O)[C@@H]1O		CHEMBL4077107	C=CC(=O)Nc1cc(-n2c(=O)ccc3cnc4ccc(-c5ccc(N)nc5)cc4c32)ccc1C
CHEMBL1652117	CC1CCC(OCCCCCCN2C[C@H](O)[C@@H](O)[C@H](O)[C@H]2CO)CC1		CHEMBL3401567	Oc1ccc(/C=N/Nc2nc(-c3ccc(-c4ccccc4)cc3)cs2)cc1		CHEMBL4455650	Clc1cccc(-c2ccc(Nc3ccnc(NCc4cccnc4)n3)cc2)c1
CHEMBL408500	CCCCCCCCCN1C[C@H](O)[C@@H](O)[C@H](O)[C@H]1CO		CHEMBL31574	O=c1c(O)c(-c2ccc(O)c(O)c2)oc2cc(O)ccc12		CHEMBL4568823	COc1cccc(S(=O)(=O)n2c3ccc(-c4cccc(C(=N)N)c4)cc3c3cc(-c4cccc(C(=N)N)c4)ccc32)c1
CHEMBL564201	O=c1cnn([C@@H]2O[C@H](CO)[C@@H](O)[C@H]2O)c(=O)[nH]1		CHEMBL2165938	OC[C@@H]1[C@@H](O)[C@H](O)[C@@H](O)CN1CCC#CCCOc1cc(F)ccc1F		CHEMBL4866738	N/C(=N\O)c1cccc(-c2ccc3c(c2)c2cc(-c4cccc(/C(N)=N/O)c4)ccc2n3S(=O)(=O)c2cc(F)cc(Br)c2)c1
CHEMBL311226	O[C@H]1CN2CC[C@H](O)[C@@H]2[C@@H](O)[C@@H]1O		CHEMBL2165925	COc1ccc(OCCCCCCN2C[C@H](O)[C@@H](O)[C@H](O)[C@H]2CO)cc1		CHEMBL4079772	O=C(NC1CCCC1)C1CN(c2ccc(C(F)(F)F)cc2)CC(=O)N1c1ccc2ccsc2c1
CHEMBL215226	CN[C@@H]1[C@@H](O)[C@@H](O[C@@H]2[C@@H](O)[C@H](O[C@H]3O[C@H]([C@@H](C)O)[C@@H](O)[C@H](O)[C@H]3N)[C@@H](N)C[C@H]2N)OC[C@]1(C)O		CHEMBL2163431	OC[C@@H]1[C@@H](O)[C@H](O)[C@@H](O)CN1CCCCCCOC1CCCCC1		CHEMBL4086804	O=C(NC1CCCC1)C1CN(c2ccc(C(F)(F)F)cc2)CC(=O)N1c1cnc2ccsc2c1
CHEMBL3637932	CC(C)(C)OC(=O)N1CCN(c2nccc(-c3ccc(-c4ccc(Cl)cc4)s3)n2)CC1		CHEMBL32926	O=c1oc2ccccc2c(O)c1C1c2ccccc2Oc2c1c(=O)oc1ccccc21		CHEMBL4787097	Cc1ccc(NC(=O)c2nccnc2C(=O)NCc2ccccc2-c2ccsc2)cc1
CHEMBL3578056	Cc1cn([C@H]2C[C@H](NC(=O)c3cccc4ccccc34)[C@@H](CO)O2)c(=O)[nH]c1=O		CHEMBL4160425	COc1cc(-c2cnc3c(N4CCCC(C(N)=O)C4)snc3c2)ccc1N		CHEMBL81073	COc1cc2ncc(C#N)c(Nc3cc(OC)c(OC)c(OC)c3)c2cc1OC
CHEMBL3578044	Cc1cn([C@H]2C[C@H](N3C(=O)CSC3c3ccccc3)[C@@H](CO)O2)c(=O)[nH]c1=O		CHEMBL2440172	CCCC[C@H](NC(=O)[C@H](CCCCN)NC(=O)[C@H](CCCNC(=N)N)NC(=O)c1ccc(/C=C2\SC(=S)N(C3CCCC3)C2=O)cc1)C(N)=O		CHEMBL4745028	COc1cc(-c2cnc3c(N4CCC[C@H](CNC(=O)C5CC5)C4)snc3c2)ccc1N
CHEMBL3088190	Cc1cn([C@H]2C[C@H](n3nncc3C3CCCCC3)[C@@H](CO)O2)c(=O)[nH]c1=O		CHEMBL564971	CC(CO)CC[C@@H](O)[C@](C)(O)[C@H]1CC[C@@]2(O)C3=CC(=O)[C@@H]4C[C@@H](O)[C@@H](O)C[C@]4(C)[C@H]3CC[C@]12C		CHEMBL4586079	COc1ccc(S(=O)(=O)N(CCCC(=O)C2CCCCCC2)C2CCCCC2)cc1
CHEMBL3088186	Cc1cn([C@H]2C[C@H](n3nncc3-c3ccc(-c4ccccc4)cc3)[C@@H](CO)O2)c(=O)[nH]c1=O		CHEMBL2165940	CC1CCC(OCCCCCCN2C[C@H](O)[C@@H](O)[C@H](O)[C@H]2CO)CC1C		CHEMBL3735377	CC(=O)Nc1ccc(-n2nc3ccccc3n2)cc1
CHEMBL3578032	Cc1cn([C@H]2C[C@H](N=[N+]=[N-])[C@@H](CO[Si](C)(C)C(C)(C)C)O2)c(=O)[nH]c1=O		CHEMBL8260	O=c1cc(-c2ccccc2)oc2cc(O)c(O)c(O)c12		CHEMBL3735788	[O-][n+]1c2ccccc2nn1-c1ccc(O)cc1
CHEMBL3578030	COc1ccc2cc(-c3cnnn3[C@H]3C[C@H](n4cc(C)c(=O)[nH]c4=O)O[C@@H]3COC3CCCCO3)ccc2c1		CHEMBL517826	Nc1ncnc2c1ncn2Cc1cn([C@H]2C[C@H](O)[C@@H](CO)O2)nn1		CHEMBL4783811	CC1(C)CC(=O)C2=C(C1)N(c1ccccc1)C(c1ccc(Br)cc1)N(c1ccc(OC(F)(F)F)cc1)C2
CHEMBL3578028	COC[C@H]1O[C@@H](n2cc(C)c(=O)n(C)c2=O)C[C@@H]1n1nncc1-c1ccc2cc(OC)ccc2c1		CHEMBL4567695	CSc1ncnc2c1c1c(ccn1C)n2[C@@H]1O[C@H](CO)[C@@H](O)[C@H]1O		CHEMBL4515898	C[C@@H](c1ccc(Cl)cc1)n1nnc2c1NC(=O)C[C@]21C(=O)N(Cc2ccccn2)c2ccc(Cl)cc21
CHEMBL1090869	Cc1cn([C@H]2C[C@H](n3nncc3-c3ccccc3)[C@@H](CO)O2)c(=O)[nH]c1=O		CHEMBL4517245	Cn1ccc2c3c(N)ncnc3n([C@@H]3O[C@H](CO)[C@@H](O)[C@H]3O)c21		CHEMBL4463238	CN1CCN(c2nccc(Nc3ccc(-c4ccc(Cl)cc4)cc3)n2)CC1
CHEMBL3578066	Cc1cn([C@H]2C[C@H](NC(=O)c3ccc(N4CCOCC4)cc3)[C@@H](CO[Si](C)(C)C(C)(C)C)O2)c(=O)[nH]c1=O		CHEMBL4458110	CN(C)c1ncnc2c1c1occc1n2[C@@H]1O[C@H](CO)[C@@H](O)[C@H]1O		CHEMBL4093255	COc1ccc(Cn2cnc3nc(Cl)nc(Cl)c32)cc1
CHEMBL575724	CN(CCCNC(=O)c1ccc(O)cc1)CCCNC(=O)c1ccc2cc(O)ccc2c1		CHEMBL3740600	N=C(N)NCCC[C@H](NC(=O)c1cc2ccsc2s1)C(=O)N[C@@H](CCCCN)C(=O)N[C@@H](C(N)=O)c1ccc(OCc2ccc(C(F)(F)F)cc2)cc1		CHEMBL3426582	O=C1CC2(C(=O)Nc3ccc(Cl)cc32)c2cnn(CCc3ccc(Cl)cc3)c2N1
CHEMBL582943	CCN(CCOC(=O)/C=C/c1ccc(O)cc1)Cc1cc(Cl)ccc1O		CHEMBL3741713	COc1cccc(COc2ccc([C@@H](NC(=O)[C@H](CCCCN)NC(=O)[C@H](CCCNC(=N)N)NC(=O)c3ccc(-c4cccs4)s3)C(N)=O)cc2)c1		CHEMBL4173042	NS(=O)(=O)c1ccc(N2N=C(c3ccc(Oc4ccccc4)cc3)CC2c2ccccc2)cc1
CHEMBL2348377	CC(C)(C)C(=O)N(CCCCCCN1C[C@H](O)[C@@H](O)[C@H](O)[C@H]1CO)c1cc(F)ccc1F		CHEMBL2440162	CCCC[C@H](NC(=O)[C@H](CCCCN)NC(=O)[C@H](CCCNC(=N)N)NC(=O)c1ccc(/C=C2\SC(=S)N(CCc3ccccc3)C2=O)cc1)C(N)=O		CHEMBL4166621	NS(=O)(=O)c1ccc(N2N=C(c3ccc(Oc4ccccc4)cc3)CC2c2ccccc2F)cc1
CHEMBL1631362	O=C(CCCC[C@@H]1SC[C@H]2NC(=O)N[C@H]21)NCCOCCOCCNc1nc(-c2ccc(-c3ccc(Cl)cc3)s2)c2ccccc2n1		CHEMBL2440167	CCCC[C@H](NC(=O)[C@H](CCCCN)NC(=O)[C@H](CCCNC(=N)N)NC(=O)c1ccc(/C=C2\SC(=S)N(C)C2=O)cc1)C(N)=O		CHEMBL4177143	Cc1cccc(C2CC(c3ccc(Oc4ccccc4)cc3)=NN2c2ccc(S(N)(=O)=O)cc2)c1
CHEMBL512494	OC[C@@H]1C=C[C@H](c2scc3c(O)ncnc23)O1		CHEMBL4459797	Clc1ccc(-c2ccc(Nc3ccnc(NCCN4CCCCC4)n3)cc2)cc1		CHEMBL4553067	COc1ccc(-c2cnc3[nH]cc(NC(=O)Cc4ccccc4)c3c2)cc1OC
CHEMBL3604363	Nc1nc(F)cc2c1ncn2[C@@H]1C=C(CO)[C@@H](O)[C@H]1O		CHEMBL4457311	CC1(C)CC(Nc2nccc(NCc3ccc(F)cc3)n2)CC(C)(C)N1		CHEMBL4205902	COc1cc(NC(C(=O)c2c[nH]c3ccccc23)c2ccc(F)cc2)cc(OC)c1
CHEMBL3578039	Cc1cn([C@H]2C[C@H](n3nncc3C3CCCCC3)[C@@H](CO[Si](C)(C)C(C)(C)C)O2)c(=O)[nH]c1=O		CHEMBL4553315	c1ccc(-c2ccc(Nc3ccnc(NCc4cccnc4)n3)cc2)cc1		CHEMBL4205665	COc1cc(NC(C(=O)c2c[nH]c3ccccc23)c2cccnc2)cc(OC)c1
CHEMBL2312735	Nc1ncc(I)c2c1ncn2[C@@H]1C[C@H](O)[C@@H](O)[C@H]1O		CHEMBL4549111	Clc1ccc(CNc2ccnc(NCc3cccnc3)n2)cc1		CHEMBL4206060	COc1cc(NC(C(=O)c2c[nH]c3ccc(CCO)cc23)c2ccccc2)cc(OC)c1
CHEMBL236207	C[C@@]1(O)[C@H](O)[C@@H](CO)O[C@H]1n1ccc2c(N)ncnc21		CHEMBL4576745	N=C(N)NCCC[C@H](NC(=O)c1ccccc1)C(=O)N[C@@H](CCCCN)C(=O)N[C@@H](C(=O)N[C@H]1CN(c2ccc(F)cc2)C1=O)c1ccc(OCc2ccccc2)cc1		CHEMBL4067338	Cc1ccc(-n2c(=O)ccc3ccc4ccc(-c5ccc6ccncc6c5)cc4c32)cc1NC(=O)/C=C/CN(C)C
CHEMBL3578042	Cc1cn([C@H]2C[C@H](N)[C@@H](CO[Si](C)(C)C(C)(C)C)O2)c(=O)[nH]c1=O		CHEMBL4639241	COc1cccc(COc2ccc(C(=O)N[C@H](C(=O)NCc3ccc(NC(=N)N)cc3)c3ccc(OCc4ccccc4)cc3)cc2)c1.O=C(O)C(F)(F)F		CHEMBL4782798	Cc1ccc(NC(=O)c2nccnc2C(=O)Nc2ccc(C)cc2-c2ccsc2)cc1
CHEMBL3578061	Cc1cn([C@H]2C[C@H](NC(=O)c3ccc4ccccc4n3)[C@@H](CO[Si](C)(C)C(C)(C)C)O2)c(=O)[nH]c1=O		CHEMBL2413323	Nc1ncnc2c1c1c(Cl)cccc1n2[C@@H]1O[C@H](CO)[C@@H](O)[C@H]1O		CHEMBL4240342	O=P([O-])([O-])CO[C@H]1C[C@@H](n2cnc3c(O)ncnc32)C=C1I.[Na+].[Na+]
CHEMBL3578047	Cc1cn([C@H]2C[C@H](N3C(=O)CSC3c3c4ccccc4cc4ccccc34)[C@@H](CO[Si](C)(C)C(C)(C)C)O2)c(=O)[nH]c1=O		CHEMBL4218618	O=C(c1c[nH]c2ccccc12)C(Nc1cccnc1)c1ccccc1		CHEMBL4592501	COc1ccc2nccc(Nc3cc(OC)c(OC)c(OC)c3)c2c1
CHEMBL265502	Cc1ccc(C(=O)Nc2ccc(S(=O)(=O)O)c3cc(S(=O)(=O)O)cc(S(=O)(=O)O)c23)cc1NC(=O)c1cccc(NC(=O)Nc2cccc(C(=O)Nc3cc(C(=O)Nc4ccc(S(=O)(=O)O)c5cc(S(=O)(=O)O)cc(S(=O)(=O)O)c45)ccc3C)c2)c1		CHEMBL4215399	COc1cccc(NC(C(=O)c2c[nH]c3ccccc23)c2cc(C)on2)c1		CHEMBL4083688	C=CC(=O)N1CCc2ccc(-n3c(=O)n(C)c4cnc5ccc(-c6ccc7ccncc7c6)cc5c43)cc21
CHEMBL1631359	Clc1ccc(-c2ccc(-c3ccnc(N4CCNCC4)n3)s2)cc1		CHEMBL4205131	COc1cccc(NC(C(=O)c2c[nH]c3cc(OC)ccc23)c2ccccc2)c1		CHEMBL4072499	CSc1cccc(N(C(=O)c2cc3ccc(C(F)(F)F)cc3[nH]2)[C@H](C)C(=O)NC2CCCC2)c1
CHEMBL1631361	Clc1ccc(-c2ccc(-c3nc(NCc4cccnc4)nc4ccccc34)s2)cc1		CHEMBL4218426	COc1cc(NC(C(=O)c2c[nH]c3cc(CCS(C)(=O)=O)ccc23)c2ccccc2)cc(OC)c1		CHEMBL4078951	O=C(Nc1cccnc1)C1CN(c2ccccc2)CC(=O)N1c1ccc2ccsc2c1
CHEMBL1652113	OC[C@@H]1[C@@H](O)[C@H](O)[C@@H](O)CN1CCCCCC1(O)CCCCC1		CHEMBL4209500	COc1cc(NC(C(=O)c2c[nH]c3cccc(CCCO)c23)c2ccccc2)cc(OC)c1		CHEMBL4857771	COc1cc2nc(NC(=O)c3ccc(I)cc3)sc2cc1OC
CHEMBL177820	Brc1c(Br)c(Br)c2[nH]nnc2c1Br		CHEMBL4206685	COc1cc(CO)cc(NC(C(=O)c2c[nH]c3ccccc23)c2ccccc2)c1		CHEMBL4747707	Cc1ccc(NC(=O)c2ccccc2NC(=O)c2ccc(F)cc2)c(-c2cccnc2)c1
CHEMBL1421	Cc1nc(Nc2ncc(C(=O)Nc3c(C)cccc3Cl)s2)cc(N2CCN(CCO)CC2)n1		CHEMBL2440161	CCCC[C@H](NC(=O)[C@H](CCCCN)NC(=O)[C@H](CCCNC(=N)N)NC(=O)c1ccc(/C=C2\SC(=S)N(Cc3ccc(Cl)cc3)C2=O)cc1)C(N)=O		CHEMBL2042322	Nc1nc(N)c2c(OC3CCCC3)cccc2n1
CHEMBL1631357	CC(C)(N)/C=C/c1cccc(-c2ccc(-c3ccnc(NC4CC(C)(C)NC(C)(C)C4)n3)s2)n1		CHEMBL2440175	CCCCC(C(=O)OC)N1C(=O)/C(=C/c2ccc(C(=O)N[C@@H](CCCNC(=N)N)C(=O)N[C@@H](CCCCN)C(=O)N[C@@H](CCCC)C(N)=O)cc2)SC1=S		CHEMBL4289284	CN(C)CCCCOC(=O)Nc1ccc(Cn2nc(-c3ccncc3)c3ccccc3c2=O)cc1
CHEMBL1794051	Oc1c(Br)cc(C=C2c3cc(I)ccc3NC2O)cc1Br		CHEMBL4457482	CCCCCCCCCCCCCCCC[N+](CC)(CO)CO.[Br-]		CHEMBL4069228	C=CC(=O)Nc1cc(-n2c(=O)ccc3cnc4ccc(-c5cnn(C)c5)cc4c32)ccc1C(=O)N(C)C
CHEMBL941	Cc1ccc(NC(=O)c2ccc(CN3CCN(C)CC3)cc2)cc1Nc1nccc(-c2cccnc2)n1		CHEMBL4212873	COc1ccc(NC(C(=O)c2c[nH]c3ccccc23)c2ccccc2)cc1OC		CHEMBL4793172	CC1(C)CC(=O)C2=C(C1)N(c1ccccc1)C(c1ccc(-c3ccccc3)cc1)N(c1ccccc1)C2
CHEMBL2312734	Nc1ncc(Cl)c2c1ncn2[C@@H]1C[C@H](O)[C@@H](O)[C@H]1O		CHEMBL4210976	COc1cccc(NC(C(=O)c2c[nH]c3ccc(F)cc23)c2ccccc2)c1		CHEMBL4797102	CC(C)c1ccc(N2CC3=C(CC(C)(C)CC3=O)N(c3ccccc3)C2c2ccc(Br)cc2)cc1
CHEMBL1835515	Cc1cc(C)cc(C(=O)c2cc(Cl)ccc2OCCn2c(C)cc(=O)[nH]c2=O)c1		CHEMBL2042320	Nc1nc(N)c2c(OCC(F)(F)F)cccc2n1		CHEMBL4758347	COc1cc(Nc2ncnc3cc(F)c(F)cc23)cc(OC)c1OC
CHEMBL217092	CN1CCN(CCOc2cc(OC3CCOCC3)c3c(Nc4c(Cl)ccc5c4OCO5)ncnc3c2)CC1		CHEMBL2042324	CC(C)(C)Nc1cccc2nc(N)nc(N)c12		CHEMBL4283360	CN(C)CCCCOC(=O)Nc1ccc(Cn2nc(-c3ccccc3C#N)c3ccccc3c2=O)cc1
CHEMBL3637931	COC(=O)c1ccc(F)cc1NS(=O)(=O)c1cccc(-c2cnn(Cc3ccccc3)c2)c1		CHEMBL336468	CN(C)c1cccc2nc(N)nc(N)c12		CHEMBL4281161	CN(C)CCCCN(C(=O)O)c1ccccc1Cn1nc(-c2ccc(F)cc2)c2ccccc2c1=O
CHEMBL3339403	Cc1ccc(NC(=O)c2nccnc2C(=O)NCc2ccc(-c3ccncc3)cc2)cc1		CHEMBL1535	CCN(CCO)CCCC(C)Nc1ccnc2cc(Cl)ccc12		CHEMBL4293754	CN(C)CCCCOC(=O)Nc1ccc(Cn2nc(-c3cncnc3)c3ccccc3c2=O)cc1
CHEMBL3337475	Cc1ccc(NC(=O)c2nc[nH]c2C(=O)Nc2ccccc2)c(-c2ccsc2)c1		CHEMBL4546393	C=CCn1c2cc(Cl)ccc2c(=O)c2cccc(OC)c21		CHEMBL4278390	CN(C)CCCCOC(=O)Nc1ccc(Cn2nc(-c3ccc(C#N)cc3)c3ccccc3c2=O)cc1
CHEMBL485854	CNc1ncc2c(n1)N(C)C(=O)N(c1cc(NC(=O)c3cc(-n4cnc(C)c4)cc(C(F)(F)F)c3)ccc1C)C2		CHEMBL4168561	Cc1ccccc1C1CC(c2ccccc2)=NN1c1ccc(S(N)(=O)=O)cc1		CHEMBL4764705	CCC(=O)Nc1cccc(-c2snc3cc(-c4ccc(N)c(OC)c4)cnc23)c1
CHEMBL1835507	Cc1cc(C)cc(C(=O)c2cc(Cl)ccc2OCCn2ccc(=O)[nH]c2=O)c1		CHEMBL4176360	NS(=O)(=O)c1ccc(N2N=C(c3ccc(OCc4ccccc4)cc3)CC2c2ccc(F)cc2)cc1		CHEMBL4094528	O=C(NC1CCC1)C1CN(c2ccccc2)CC(=O)N1c1ccc2ccsc2c1
CHEMBL1835509	O=C(c1cc(F)cc(F)c1)c1cc(Cl)ccc1OCCn1ccc(=O)[nH]c1=O		CHEMBL4283000	OC[C@H]1O[C@@H](n2c3ccc(Cl)cc3c3c(Cl)ncnc32)[C@@H](O)[C@@H]1O		CHEMBL3736284	Cc1ccc2nn(-c3ccc(OCC(C)(C)C(=O)O)cc3)nc2c1
CHEMBL572497	O=C1C=C2CCN3Cc4cc5c(cc4[C@H]([C@@H]1O)[C@@H]23)OCO5		CHEMBL4288440	OC[C@H]1O[C@@H](n2c3ccc(Cl)cc3c3c(-c4ccco4)ncnc32)[C@@H](O)[C@@H]1O		CHEMBL4851250	COc1cc2c(cc1NC(=O)c1ccc(C(C)(C)C)cc1)CCCCC2
CHEMBL3339409	Cc1ccc(NC(=O)c2nccnc2C(=O)Nc2ccc(C)cc2-c2ccncc2)cc1		CHEMBL4279588	OC[C@H]1O[C@@H](n2c3ccc(Cl)cc3c3c(-c4ccsc4)ncnc32)[C@H](F)[C@@H]1O		CHEMBL3102941	COc1ccc(-c2cnc3[nH]cc(-c4ccccc4)c3c2)cc1OC
CHEMBL226335	C[C@@H]1O[C@@H](OC[C@H]2O[C@@H](Oc3c(-c4ccc(O)c(O)c4)oc4cc(O)cc(O)c4c3=O)[C@H](O)[C@@H](O)[C@@H]2O)[C@H](O)[C@H](O)[C@H]1O		CHEMBL4202454	COc1nc(NC(C(=O)c2c[nH]c3ccccc23)c2ccccc2)ns1		CHEMBL4448513	COc1ccc(-c2cnc3[nH]cc(C#Cc4cccc(C#N)c4)c3c2)cc1OC
CHEMBL2348376	CC(C)(C)C(=O)N(CCCCCCN1C[C@H](O)[C@@H](O)[C@H](O)[C@H]1CO)C1CC1		CHEMBL4214655	COc1cccc(NC(C(=O)c2c[nH]c3ccccc23)c2ccc(C)cc2)c1		CHEMBL4278035	COc1ncnc2c1c1cc(Cl)ccc1n2[C@@H]1O[C@H](CO)[C@@H](O)[C@@H]1F
CHEMBL225599	Nc1ncnc2c([C@@H]3C=C(CO)[C@@H](O)[C@H]3O)c[nH]c12		CHEMBL4206605	COc1cccc(NC(C(=O)c2c[nH]c3cccc(Cl)c23)c2ccccc2)c1		CHEMBL4292112	OC[C@H]1O[C@@H](n2c3ccc(Cl)cc3c3c(-c4ccco4)ncnc32)[C@@H](F)[C@@H]1O
CHEMBL3604361	Nc1ncc(F)c2c1ncn2[C@@H]1C=C(CO)[C@@H](O)[C@H]1O		CHEMBL4206172	COc1cc(NC(C(=O)c2c[nH]c3cc(CCO)ccc23)c2ccccc2)cc(OC)c1		CHEMBL9352	O=C1C[C@@H](c2ccc(O)cc2)Oc2cc(O)cc(O)c21
CHEMBL2348375	CC(C)(C)C(=O)N(CCCCCCN1C[C@H](O)[C@@H](O)[C@H](O)[C@H]1CO)C1CCC1		CHEMBL4209676	COc1cc(F)cc(NC(C(=O)c2c[nH]c3ccccc23)c2ccccc2)c1		CHEMBL4458866	C=CCn1c2ccccc2c(=O)c2cc(Cl)ccc21
CHEMBL2059156	Nc1ncc(Br)c2c1ncn2[C@@H]1C[C@H](CO)[C@@H](O)[C@H]1O		CHEMBL4210069	N#Cc1cccc(NC(C(=O)c2c[nH]c3ccccc23)c2ccccc2)c1		CHEMBL28324	CN([C@@H](Cc1ccc(OS(=O)(=O)c2cccc3cnccc23)cc1)C(=O)N1CCN(c2ccccc2)CC1)S(=O)(=O)c1cccc2cnccc12
CHEMBL483847	NC(=O)c1cccc(-c2cc(Nc3ccc(OC(F)(F)F)cc3)ncn2)c1		CHEMBL343286	Nc1nc(N)c2c(Oc3ccccc3)cccc2n1		CHEMBL4465628	COc1ccc(S(=O)(=O)N(CCCC(O)c2ccc(F)cc2)c2ccccc2)cc1
CHEMBL3339386	O=C(NCc1ccc(-c2cccnc2)cc1)c1nc[nH]c1C(=O)Nc1ccc(F)cc1		CHEMBL4634331	N=C(N)Nc1ccc(CNC(=O)[C@@H](NC(=O)c2ccc(Oc3ccccc3)cc2)c2ccc(OCc3ccccc3)cc2)cc1.O=C(O)C(F)(F)F		CHEMBL4589079	Clc1ccc(Nc2ccnc(NCc3cccnc3)n2)cc1
CHEMBL2348371	CC(C)(C)C(=O)N(CCCCCCN1C[C@H](O)[C@@H](O)[C@H](O)[C@H]1CO)C1C2CC3CC(C2)CC1C3		CHEMBL73809	C[C@@]1(O)[C@H](O)[C@@H](CO)O[C@H]1n1cnc2c(N)ncnc21		CHEMBL4800032	COc1cc(-c2cnc3c(N4CCCC(CNC(=O)C5CC5)C4)snc3c2)ccc1N
CHEMBL3578033	Cc1cn([C@H]2C[C@H](n3nncc3-c3ccccc3)[C@@H](CO[Si](C)(C)C(C)(C)C)O2)c(=O)[nH]c1=O		CHEMBL311635	CC[C@@]1(O)[C@H](O)[C@@H](CO)O[C@H]1n1cnc2c(N)ncnc21		CHEMBL4858851	N/C(=N\O)c1cccc(-c2ccc3c(c2)c2cc(-c4cccc(/C(N)=N/O)c4)ccc2n3Cc2cc(F)cc(Br)c2)c1
CHEMBL3339388	O=C(NCc1ccc(-c2ccncc2)cc1)c1nc[nH]c1C(=O)Nc1ccc(F)cc1		CHEMBL2403284	O=c1ccn([C@@H]2O[C@H](COC(c3ccccc3)(c3ccccc3)c3ccccc3)[C@@H](O)[C@H]2OC(c2ccccc2)(c2ccccc2)c2ccccc2)c(=O)[nH]1		CHEMBL4860480	Cn1c2ccc(-c3cccc(/C(N)=N/O)c3)cc2c2cc(-c3cccc(/C(N)=N/O)c3)ccc21
CHEMBL4643305	COC(=O)[C@H](C)NP(=O)(NC[C@H]1O[C@@H](n2cnc3c(N)ncnc32)[C@](C)(O)[C@@H]1O)Oc1ccccc1		CHEMBL4453393	O=C(Nc1c[nH]c2ncc(-c3ccc(F)cc3)cc12)c1cccnc1		CHEMBL4437334	O=C1C=C/C(=N/Nc2ccc([N+](=O)[O-])cc2Cl)C=C1C(=O)Nc1cccc(Cl)c1
CHEMBL4648722	COC(=O)[C@H](C)NP(=O)(Oc1ccccc1)SC[C@H]1O[C@@H](n2cnc3c(N)ncnc32)[C@](C)(O)[C@@H]1O		CHEMBL4450261	COc1ccc(-c2cnc3[nH]cc(NC(=O)c4cccnc4)c3c2)cc1		CHEMBL2165945	OC[C@@H]1[C@@H](O)[C@H](O)[C@@H](O)CN1CCCCCCOc1ccccc1
CHEMBL3339387	O=C(NCc1ccc(-c2ccsc2)cc1)c1nc[nH]c1C(=O)Nc1ccc(F)cc1		CHEMBL4471240	COc1ccc(-c2cnc3c(c2)c(NC(=O)c2cccnc2)cn3C)cc1OC		CHEMBL4759000	COc1cc(Nc2c(C#N)cnc3ccc(I)cc23)cc(OC)c1OC
CHEMBL3603846	Cc1cnc(N)c2ncn([C@@H]3C=C(CO)[C@@H](O)[C@H]3O)c12		CHEMBL386148	Oc1ncnc2c1ncn2[C@@H]1O[C@H](COC(c2ccccc2)(c2ccccc2)c2ccccc2)[C@@H](O)[C@H]1O		CHEMBL4755045	COc1cc(Nc2cc(C)nc3cc(C(F)(F)F)ccc23)cc(OC)c1OC
CHEMBL3339392	Cc1ccc(NC(=O)c2[nH]cnc2C(=O)Nc2ccc(C)cc2-c2ccco2)cc1		CHEMBL2403291	Cc1cn([C@H]2C[C@H](OC(c3ccccc3)(c3ccccc3)c3ccccc3)[C@@H](CO)O2)c(=O)[nH]c1=O		CHEMBL4785715	Cc1ccc(NC(=O)c2ccccc2NC(=O)c2ccc(F)cc2)c(-c2ccsc2)c1
CHEMBL4436053	CC(=O)O[C@@H]1C(=O)C=C2CCN3Cc4cc5c(cc4[C@H]1[C@@H]23)OCO5		CHEMBL2403289	Cc1cn([C@H]2C[C@H](OC(c3ccccc3)(c3ccccc3)c3ccccc3)[C@@H](COC(c3ccccc3)(c3ccccc3)c3ccccc3)O2)c(=O)[nH]c1=O		CHEMBL4783875	Cc1ccc(NC(=O)c2ccccc2C(=O)NCc2ccccc2-c2ccsc2)cc1
CHEMBL1835514	Cc1cc(C)cc(C(=O)c2cc(Cl)ccc2OCCn2cc(C)c(=O)[nH]c2=O)c1		CHEMBL2403283	O=c1ccn([C@@H]2O[C@H](COC(c3ccccc3)(c3ccccc3)c3ccccc3)[C@@H](OC(c3ccccc3)(c3ccccc3)c3ccccc3)[C@H]2O)c(=O)[nH]1		CHEMBL4250928	Nc1ncnc2c1ncn2[C@H]1C=C(F)[C@@H](OCP(=O)([O-])O)C1.[Na+]
CHEMBL2041662	COc1cc(NC(=S)NC(=O)c2ccc(C(C)(C)C)cc2)ccc1NC(=O)c1ccccc1Cl		CHEMBL2413441	Nc1ncnc2c1c1cc(-c3cc4ccccc4o3)ccc1n2[C@@H]1O[C@H](CO)[C@@H](O)[C@H]1O		CHEMBL4243308	Nc1ncnc2c1ncn2[C@H]1C=C(I)[C@@H](OCP(=O)(O)O)C1
CHEMBL1835497	Cc1cccc(Cc2cc(C)ccc2OCCn2ccc(=O)[nH]c2=O)c1		CHEMBL4451009	CC#CCN1C(=O)[C@]2(CC(=O)Nc3c2nnn3[C@@H](C)c2ccc(Cl)cc2)c2cc(Cl)ccc21		CHEMBL4171678	COc1cc(-c2cnc3c(N4CCNC(=O)C4)snc3c2)ccc1N
CHEMBL1835498	Cc1cc(C)cc(Cc2cc(C)ccc2OCCn2ccc(=O)[nH]c2=O)c1		CHEMBL4475139	C[C@@H](c1ccc(Cl)cc1)n1nnc2c1NC(=O)C[C@]21C(=O)N(Cc2ccccc2)c2ccc(Cl)cc21		CHEMBL4165336	COc1cc(-c2cnc3c(N4C[C@@H](C)O[C@H](C)C4)snc3c2)ccc1N
CHEMBL1835500	Cc1cc(C)cc(Cc2cc(Br)ccc2OCCn2ccc(=O)[nH]c2=O)c1		CHEMBL4470681	C[C@@H](c1ccc(Cl)cc1)n1nnc2c1NC(=O)C[C@]21C(=O)N(Cc2ccc(F)cc2)c2ccc(Cl)cc21		CHEMBL4434650	COc1cccc(CN2C(=O)[C@]3(CC(=O)Nc4c3nnn4[C@@H](C)c3ccc(Cl)cc3)c3cc(Cl)ccc32)c1
CHEMBL1835501	Cc1ccc(OCCn2ccc(=O)[nH]c2=O)c(C(=O)c2ccccc2)c1		CHEMBL4447821	COc1cc(CN2C(=O)[C@]3(CC(=O)Nc4c3nnn4[C@@H](C)c3ccc(Cl)cc3)c3cc(Cl)ccc32)cc(OC)c1		CHEMBL4519498	COCCCN1C(=O)C[C@]2(C(=O)Nc3ccc(Cl)cc32)c2nnn([C@@H](C)c3ccc(Cl)cc3)c21
CHEMBL1835503	O=C(c1ccccc1)c1cc(Cl)ccc1OCCn1ccc(=O)[nH]c1=O		CHEMBL4575020	C[C@@H](c1ccc(Cl)cc1)n1nnc2c1NC(=O)C[C@]21C(=O)N(Cc2cccnc2)c2ccc(Cl)cc21		CHEMBL4467064	C[C@@H](c1ccc(Cl)cc1)n1nnc2c1NC(=O)C[C@]21C(=O)N(CCN2CCN(C)CC2)c2ccc(Cl)cc21
CHEMBL319620	O=C(O)c1cc(NCc2cc(O)ccc2O)ccc1O		CHEMBL4538647	COC(=O)CN1C(=O)[C@]2(CC(=O)Nc3c2nnn3[C@@H](C)c2ccc(Cl)cc2)c2cc(Cl)ccc21		CHEMBL4455078	C[C@@H](c1ccc(Cl)cc1)n1nnc2c1NC(=O)C[C@]21C(=O)N(CCN2CCC2)c2ccc(Cl)cc21
CHEMBL3578063	Cc1cn([C@H]2C[C@H](NS(=O)(=O)c3ccc4ccccc4c3)[C@@H](CO[Si](C)(C)C(C)(C)C)O2)c(=O)[nH]c1=O		CHEMBL4471937	C[C@@H](c1ccc(Cl)cc1)n1nnc2c1NC(=O)C[C@]21C(=O)N(CCCCCl)c2ccc(Cl)cc21		CHEMBL2094770	CN1CCN(C2Cc3ccc(F)cc3Sc3ccc(O)cc32)CC1
CHEMBL3578038	Cc1cn([C@H]2C[C@H](n3nncc3C3CC3)[C@@H](CO[Si](C)(C)C(C)(C)C)O2)c(=O)[nH]c1=O		CHEMBL4565698	C[C@@H](c1ccc(Cl)cc1)n1nnc2c1NC(=O)C[C@]21C(=O)N(CCCCCCBr)c2ccc(Cl)cc21		CHEMBL4084531	COc1ccc(Cn2cnc3c(Nc4ccc(C)cc4-c4cc(C)n[nH]4)nc(Cl)nc32)cc1
CHEMBL3578045	Cc1cn([C@H]2C[C@H](N3C(=O)CSC3c3ccc4[nH]ccc4c3)[C@@H](CO[Si](C)(C)C(C)(C)C)O2)c(=O)[nH]c1=O		CHEMBL4649655	CCCCCC(=O)N[C@H](C(=O)NCc1ccc(NC(=N)N)cc1)c1ccc(OCc2ccccc2)cc1.O=C(O)C(F)(F)F		CHEMBL4537665	COc1ccc(S(=O)(=O)N(C)CCCC(=O)c2ccc(F)cc2)cc1
CHEMBL4212761	CC(C)OC(=O)[C@H](C)N[P@](=O)(OC[C@H]1O[C@@H](n2ccc(N)nc2=O)C(Br)(Br)[C@@H]1O)Oc1ccccc1		CHEMBL4636314	COc1cc(-c2cnc3c(N4C[C@H](C)O[C@H](C)C4)snc3c2)ccc1C(=O)NCc1ccccc1		CHEMBL4515601	COc1ccc(S(=O)(=O)N(CCCC(=O)C2CCCC2)c2ccccc2)cc1
CHEMBL1652119	Cc1ccc(C)c(OCCCCCCN2C[C@H](O)[C@@H](O)[C@H](O)[C@H]2CO)c1		CHEMBL4450152	COc1ncnc2c1c1c(ccn1C)n2[C@@H]1O[C@H](CO)[C@@H](O)[C@H]1O		CHEMBL4544911	C/C(=N\Nc1ccccc1)c1sc(-c2cc(Cl)nc(Oc3ccc(Cl)cc3)c2)nc1C
CHEMBL1029	CCCCN1C[C@H](O)[C@@H](O)[C@H](O)[C@H]1CO		CHEMBL4554008	Cn1ccc2c3c(-c4cc5ccccc5o4)ncnc3n([C@@H]3O[C@H](CO)[C@@H](O)[C@H]3O)c21		CHEMBL4449109	CCOC(=O)c1cnn(-c2ccccc2)c1N(S(=O)(=O)c1ccc([N+](=O)[O-])cc1)S(=O)(=O)c1ccc([N+](=O)[O-])cc1
CHEMBL1835508	Cc1cc(C)cc(C(=O)c2cc(Br)ccc2OCCn2ccc(=O)[nH]c2=O)c1		CHEMBL4462344	COc1ncnc2c1c1ccn(C)c1n2[C@@H]1O[C@H](CO)[C@@H](O)[C@H]1O		CHEMBL4549312	CC(C)(C)OC(=O)NC1C(=O)NC2Cc3ccc(c(Cl)c3)Oc3cc4cc(c3O)Oc3ccc(cc3Cl)C(O)C3NC(=O)C(NC(=O)C4NC(=O)C(NC2=O)c2cc(O)cc(c2)Oc2cc1ccc2O)c1ccc(O)c(c1)-c1c(O)cc(O)cc1C(C(=O)NC12CC4CC(CC(C4)C1)C2)NC3=O
CHEMBL1835510	O=C(c1cc(Cl)cc(Cl)c1)c1cc(Cl)ccc1OCCn1ccc(=O)[nH]c1=O		CHEMBL4455893	OC[C@H]1O[C@@H](n2c3ccoc3c3c(-c4ccco4)ncnc32)[C@H](O)[C@@H]1O		CHEMBL4468127	CC[C@H](C)[C@H](NC(=O)[C@H](Cc1c[nH]c2ccccc12)NC(=O)[C@@H](NC(=O)[C@H](CCC(=O)O)NC(=O)[C@@H](NC(=O)[C@H](CCCNC(=N)N)NC(=O)[C@H](CCC(N)=O)NC(=O)[C@@H](NC(=O)[C@H](Cc1cnc[nH]1)NC(=O)[C@H](CCCCN)NC(=O)[C@H](Cc1c[nH]c2ccccc12)NC(=O)[C@H](C)NC(=O)CNC(=O)[C@H](CCC(=O)O)NC(=O)[C@H](CO)NC(=O)[C@H](CO)NC(=O)[C@H](CCSC)NC(=O)[C@H](Cc1c[nH]c2ccccc12)NC(=O)[C@@H](NC(=O)[C@H](CCC(=O)O)NC(=O)[C@@H](NC(=O)[C@H]…
CHEMBL3578046	Cc1cn([C@H]2C[C@H](N3C(=O)CSC3c3ccc4[nH]ccc4c3)[C@@H](CO)O2)c(=O)[nH]c1=O		CHEMBL4278629	CN(C)CCCCOC(=O)Nc1ccc(Cn2nc(-c3cccnc3)c3ccccc3c2=O)cc1		CHEMBL4473559	C[C@@H](c1ccc(Cl)cc1)n1nnc2c1NC(=O)C[C@]21C(=O)N(CCCCN2CCCCC2)c2ccc(Cl)cc21
CHEMBL2348484	CC1CCCCC1N(CCCCCCN1C[C@H](O)[C@@H](O)[C@H](O)[C@H]1CO)C(=O)OC(C)(C)C		CHEMBL4289719	CN(C)CCCCOC(=O)Nc1ccc(Cn2nc(-c3cccc(C(F)(F)F)c3)c3ccccc3c2=O)cc1		CHEMBL4585761	COc1ccc(S(=O)(=O)N(CCCC(=O)C2C3CC4CC(C3)CC2C4)c2ccccc2)cc1
CHEMBL1835512	O=C(c1cc(Cl)cc(Cl)c1)c1cc(Br)ccc1OCCn1ccc(=O)[nH]c1=O		CHEMBL3401559	COc1ccc(C2=NN(c3nc(-c4ccc(Cl)cc4)cs3)C(c3ccc(O)c(OC)c3)C2)cc1		CHEMBL4534702	Cc1ccc(CNc2ccnc(NC3CC(C)(C)NC(C)(C)C3)n2)cc1
CHEMBL3578069	Cc1cn([C@H]2C[C@H](n3nncc3-c3cc4ccccc4c4ccccc34)[C@@H](CO[Si](C)(C)C(C)(C)C)O2)c(=O)[nH]c1=O		CHEMBL4455428	Cc1ccc(-c2cnc3[nH]cc(NC(=O)c4cccnc4)c3c2)cc1		CHEMBL4871224	N=C(N)NCCC[C@H](NC(=O)c1ccccc1)C(=O)NC(CCCCN)C(=O)NC(C(N)=O)c1ccc(OCc2ccccc2)cc1
CHEMBL3578068	Cc1ccc(S(=O)(=O)NC(=O)N[C@H]2C[C@H](n3cc(C)c(=O)[nH]c3=O)O[C@@H]2CO[Si](C)(C)C(C)(C)C)cc1		CHEMBL4541962	COc1ccc(-c2cnc3[nH]cc(NC(=O)c4cccnc4)c3c2)cc1OC		CHEMBL4867213	N#Cc1ccc(Oc2ccc(C(=O)N[C@H](C(=O)Nc3cccc(C(N)=O)c3)c3ccc(OCc4ccccc4)cc3)cc2)cc1
CHEMBL3578067	Cc1cn([C@H]2C[C@H](NC(=O)Nc3ccccc3)[C@@H](CO[Si](C)(C)C(C)(C)C)O2)c(=O)[nH]c1=O		CHEMBL2163426	OC[C@@H]1[C@@H](O)[C@H](O)[C@@H](O)CN1CCCCCCOc1ccc(C(F)(F)F)cc1		CHEMBL4870296	N=C(N)c1cccc(-c2ccc3c(c2)c2cc(-c4cccc(C(=N)N)c4)ccc2n3S(=O)(=O)c2ccccc2OC(F)(F)F)c1
CHEMBL3578057	Cc1cn([C@H]2C[C@H](NC(=O)c3ccc4ccccc4c3)[C@@H](CO[Si](C)(C)C(C)(C)C)O2)c(=O)[nH]c1=O		CHEMBL2064291	CCCN1C(=O)[C@H](CCCn2cnc3c(NCc4ccccc4)ncnc32)[C@H]1c1ccccc1		CHEMBL4860508	N=C(N)c1cccc(-c2ccc3c(c2)c2cc(-c4cccc(C(=N)N)c4)ccc2n3S(=O)(=O)c2ccccc2Br)c1
CHEMBL3578051	Cc1cn([C@H]2C[C@H](NC(=O)c3c4ccccc4cc4ccccc34)[C@@H](CO[Si](C)(C)C(C)(C)C)O2)c(=O)[nH]c1=O		CHEMBL464318	C=C1CC2OC3[C@H]4C(C[C@@H](C)[C@@H](OC(C)=O)[C@@H]24)[C@@H](C)CO[C@@]3(C)CC[C@H]1O		CHEMBL4861364	N/C(=N\O)c1cccc(-c2ccc3c(c2)c2cc(-c4cccc(/C(N)=N/O)c4)ccc2n3S(=O)(=O)c2ccc(C(F)(F)F)cc2)c1
CHEMBL3578048	Cc1cn([C@H]2C[C@H](N3C(=O)CSC3c3c4ccccc4cc4ccccc34)[C@@H](CO)O2)c(=O)[nH]c1=O		CHEMBL516690	C=C1CC2OC3[C@H]4C(C[C@@H](C)[C@@H](OC(C)=O)[C@@H]24)[C@@H](C)CO[C@@]3(C)CCC1=O		CHEMBL4875859	COc1ccc(F)cc1S(=O)(=O)n1c2ccc(-c3cccc(/C(N)=N/O)c3)cc2c2cc(-c3cccc(/C(N)=N/O)c3)ccc21
CHEMBL3578034	Cc1cn([C@H]2C[C@H](n3nncc3-c3cccc4ccccc34)[C@@H](CO[Si](C)(C)C(C)(C)C)O2)c(=O)[nH]c1=O		CHEMBL4444974	COC(=O)[C@@H](Cc1ccccc1)NC(=O)[C@H]1O[C@H](O[C@H]2CC[C@@]3(C)[C@@H](CC[C@]4(C)[C@@H]3C(=O)C=C3[C@@H]5C[C@@](C)(C(=O)N[C@H](Cc6ccccc6)C(=O)OC)CC[C@]5(C)CC[C@]34C)C2(C)C)[C@H](O[C@@H]2O[C@H](C(=O)N[C@H](Cc3ccccc3)C(=O)OC)[C@@H](O)[C@H](O)[C@H]2O)[C@@H](O)[C@@H]1O		CHEMBL4874327	COc1ccc(S(=O)(=O)n2c3ccc(-c4cccc(/C(N)=N/O)c4)cc3c3cc(-c4cccc(/C(N)=N/O)c4)ccc32)cc1C
CHEMBL2312733	Cc1cnc(N)c2ncn([C@@H]3C[C@H](O)[C@@H](O)[C@H]3O)c12		CHEMBL4559756	COC(=O)[C@H](CCSC)NC(=O)[C@H]1O[C@H](O[C@H]2CC[C@@]3(C)[C@@H](CC[C@]4(C)[C@@H]3C(=O)C=C3[C@@H]5C[C@@](C)(C(=O)N[C@@H](CCSC)C(=O)OC)CC[C@]5(C)CC[C@]34C)C2(C)C)[C@H](O[C@@H]2O[C@H](C(=O)N[C@@H](CCSC)C(=O)OC)[C@@H](O)[C@H](O)[C@H]2O)[C@@H](O)[C@@H]1O		CHEMBL4847102	COc1ccc(Cn2c3ccc(-c4cccc(/C(N)=N/O)c4)cc3c3cc(-c4cccc(/C(N)=N/O)c4)ccc32)cc1F
CHEMBL129	Cc1cn([C@H]2C[C@H](N=[N+]=[N-])[C@@H](CO)O2)c(=O)[nH]c1=O		CHEMBL4515705	COC(=O)[C@@H](Cc1c[nH]c2ccccc12)NC(=O)[C@H]1O[C@H](O[C@H]2CC[C@@]3(C)[C@@H](CC[C@]4(C)[C@@H]3C(=O)C=C3[C@@H]5C[C@@](C)(C(=O)N[C@H](Cc6c[nH]c7ccccc67)C(=O)OC)CC[C@]5(C)CC[C@]34C)C2(C)C)[C@H](O[C@@H]2O[C@H](C(=O)N[C@H](Cc3c[nH]c4ccccc34)C(=O)OC)[C@@H](O)[C@H](O)[C@H]2O)[C@@H](O)[C@@H]1O		CHEMBL4061119	C=CC(=O)Nc1cc(-n2c(=O)ccc3cnc4ccc(N5CCN(c6ccccc6)CC5)cc4c32)ccc1C
CHEMBL3578025	COc1ccc2cc(-c3cnnn3[C@H]3C[C@H](n4cc(C)c(=O)[nH]c4=O)O[C@@H]3CO[Si](C(C)C)(C(C)C)C(C)C)ccc2c1		CHEMBL3810119	COc1cc(OC)c(-c2ccc(C#CCO)s2)cc1C(=O)NS(=O)(=O)c1ccccc1		CHEMBL3740727	N=C(N)NCCC[C@H](NC(=O)c1nccs1)C(=O)N[C@@H](CCCCN)C(=O)N[C@@H](C(N)=O)c1ccc(OCc2ccc(C(F)(F)F)cc2)cc1
CHEMBL2059155	Nc1ncc(Br)c2c1ncn2[C@@H]1C=C(CO)[C@@H](O)[C@H]1O		CHEMBL3809880	COc1cccc(S(=O)(=O)NC(=O)c2cc(-c3ccc(C#CCO)s3)c(Cl)cc2OC)c1		CHEMBL3740757	N=C(N)NCCC[C@H](NC(=O)c1cccs1)C(=O)N[C@@H](CCCCN)C(=O)N[C@@H](C(N)=O)c1ccc(OCc2ccc(Cl)c(Cl)c2)cc1
CHEMBL1835502	O=C(c1ccccc1)c1cc(F)ccc1OCCn1ccc(=O)[nH]c1=O		CHEMBL3426587	CN1C(=O)[C@]2(CC(=O)Nc3c2cnn3Cc2ccc(Cl)cc2)c2cc(Cl)ccc21		CHEMBL3741034	N=C(N)NCCC[C@H](NC(=O)c1cc2sccc2s1)C(=O)N[C@@H](CCCCN)C(=O)N[C@@H](C(N)=O)c1ccc(OCc2c(Cl)cccc2Cl)cc1
CHEMBL3088185	Cc1cn([C@H]2C[C@H](n3cc(-c4ccc(-c5ccccc5)cc4)nn3)[C@@H](CO)O2)c(=O)[nH]c1=O		CHEMBL3426579	O=C1CC2(C(=O)Nc3ccc(Cl)cc32)c2cnn(Cc3ncc(Cl)cn3)c2N1		CHEMBL3740868	N=C(N)NCCC[C@H](NC(=O)c1cc2ccccc2s1)C(=O)N[C@@H](CCCCN)C(=O)N[C@@H](C(N)=O)c1ccc(OCc2ccc(C(F)(F)F)cc2)cc1
CHEMBL3578041	Cc1cn([C@H]2C[C@H](n3cc(-c4cc5ccccc5c5ccccc45)nn3)[C@@H](CO[Si](C)(C)C(C)(C)C)O2)c(=O)[nH]c1=O		CHEMBL3426575	O=C1CC2(C(=O)Nc3ccc(Cl)cc32)c2cnn(Cc3ccc(Cl)cn3)c2N1		CHEMBL4639263	O=C(N[C@@H](Cc1ccc(O)cc1)C(=O)O)c1cc(-c2ccccc2)c(=O)n2c1sc1ccc(OC3CCCCCC3)cc12
CHEMBL3088180	Cc1cn([C@H]2C[C@H](n3nncc3-c3cc4ccccc4c4ccccc34)[C@@H](CO)O2)c(=O)[nH]c1=O		CHEMBL2064295	CC(C)N[C@H](c1ccccc1)[C@H](CO)CCn1cnc2c(NCc3ccccc3)ncnc21		CHEMBL4633789	O=C(N[C@@H](Cc1ccc(O)cc1)C(=O)O)c1cc(-c2ccccc2)c(=O)n(-c2cccc(OC3CCCCC3)c2)c1
CHEMBL3578026	COc1ccc2cc(-c3cnnn3[C@H]3C[C@H](n4cc(C)c(=O)[nH]c4=O)O[C@@H]3CO[Si](c3ccccc3)(c3ccccc3)C(C)(C)C)ccc2c1		CHEMBL4560312	O=C(CN1C(=O)NC2(CCCCc3ccccc32)C1=O)NO		CHEMBL441687	CC1(C)[C@@H](O[C@H]2O[C@H](C(=O)O)[C@@H](O)[C@H](O)[C@H]2O[C@@H]2O[C@H](C(=O)O)[C@@H](O)[C@H](O)[C@H]2O)CC[C@@]2(C)[C@H]1CC[C@]1(C)[C@@H]2C(=O)C=C2[C@@H]3C[C@@](C)(C(=O)O)CC[C@]3(C)CC[C@]21C
CHEMBL508288	Cc1ccc(Nc2nccc(-c3ccccc3)n2)cc1F		CHEMBL4468845	COc1ccc(-c2cnc3[nH]cc(C#Cc4ccc(F)cc4)c3c2)cc1OC		CHEMBL4081875	N=C(N)NCCC[C@@H]1NC(=O)[C@H](CCCNC(=N)N)NC(=O)[C@@H](CCCNC(=N)N)NC(=O)[C@@H](Cc2ccc3ccccc3c2)NC(=O)[C@H](Cc2ccccc2)NC(=O)[C@H](CCc2ccccc2)NC(=O)[C@@H](Cc2ccccc2)NC(=O)[C@H](CCCCN)NC1=O
CHEMBL103552	O=C(O)c1cc(N(Cc2ccccc2O)Cc2cc(O)ccc2O)ccc1O		CHEMBL445740	C=C1CC/C=C(\C)CC[C@@H]2[C@@H]1CC2(C)C		CHEMBL4458661	CC(C)N1C(=O)[C@]2(CC(=O)Nc3c2nnn3[C@@H](C)c2ccc(Cl)cc2)c2cc(Cl)ccc21
CHEMBL2312736	Nc1ncc(Br)c2c1ncn2[C@@H]1C[C@H](O)[C@@H](O)[C@H]1O		CHEMBL172	O[C@@H](c1cc(C(F)(F)F)nc2c(C(F)(F)F)cccc12)[C@H]1CCCCN1		CHEMBL4576872	C#CCN1C(=O)[C@]2(CC(=O)Nc3c2nnn3[C@@H](C)c2ccc(Cl)cc2)c2cc(Cl)ccc21
CHEMBL3339395	Cc1cnc(NC(=O)c2[nH]cnc2C(=O)Nc2ccccc2)c(-c2ccc(C)s2)c1		CHEMBL1448	O=C(Nc1ccc([N+](=O)[O-])cc1Cl)c1cc(Cl)ccc1O		CHEMBL4536890	C[C@@H](c1ccc(Cl)cc1)n1nnc2c1NC(=O)C[C@]21C(=O)N(CCF)c2ccc(Cl)cc21
CHEMBL3339398	O=C(NCc1ccc(-c2cccnc2)cc1)c1nccnc1C(=O)Nc1ccc(F)cc1		CHEMBL4592292	COC(=O)[C@@H](CC(C)C)NC(=O)[C@H]1O[C@H](O[C@H]2CC[C@@]3(C)[C@@H](CC[C@]4(C)[C@@H]3C(=O)C=C3[C@@H]5C[C@@](C)(C(=O)N[C@H](CC(C)C)C(=O)OC)CC[C@]5(C)CC[C@]34C)C2(C)C)[C@H](O[C@@H]2O[C@H](C(=O)N[C@H](CC(C)C)C(=O)OC)[C@@H](O)[C@H](O)[C@H]2O)[C@@H](O)[C@@H]1O		CHEMBL4089740	C[C@@H]1NC[C@H](CCCCN)NC(=O)[C@H](CCCNC(=N)N)NC(=O)[C@H](CCCNC(=N)N)NC(=O)[C@@H](CCCNC(=N)N)NC(=O)[C@@H](Cc2ccccc2)NC(=O)[C@H](Cc2cccc3ccccc23)NC(=O)[C@H](CCc2ccccc2)NC1=O
CHEMBL3339408	Cc1ccc(NC(=O)c2nccnc2C(=O)NCc2ccccc2-c2ccncc2)cc1		CHEMBL4215935	COc1cc(NC(C(=O)c2c[nH]c3ccc(F)cc23)c2ccccc2)cc(OC)c1		CHEMBL3628517	C[C@]1(CO)O[C@@H](n2cc(-c3cc4ccccc4o3)c3c(N)ncnc32)[C@H](O)[C@@H]1O
CHEMBL249089	O=S(=O)(c1cccc2c(I)cccc12)N1CCCNCC1		CHEMBL4216831	COc1cccc(NC(C(=O)c2c[nH]c3c(F)cccc23)c2ccccc2)c1		CHEMBL4462395	COc1cc(N(C)c2ccnc3ccc(C(F)(F)F)cc23)cc(OC)c1OC
CHEMBL296586	O=C1Cc2c([nH]c3ccc(Br)cc23)-c2ccccc2N1		CHEMBL1797896	CC(C)(C)NC(=O)C(=O)/C=C/c1c[nH]c2ccccc12		CHEMBL4781494	Cc1ccc(NC(=O)c2ccccc2C(=O)Nc2ccc(F)cc2)c(-c2ccc(C)s2)c1
CHEMBL575429	O=C(O)/C=C/c1ccc(OS(=O)(=O)O)cc1		CHEMBL2016758	C[C@@]1(c2ccc3c(N)ncnn23)O[C@H](CO)[C@@H](O)[C@H]1O		CHEMBL4878316	O=C(Nc1nc2cc(O)c(O)cc2s1)c1ccc(I)cc1
CHEMBL1643	NC(=O)c1ncn([C@@H]2O[C@H](CO)[C@@H](O)[C@H]2O)n1		CHEMBL1269813	Cc1ccnc2c1ncn2[C@@H]1O[C@H](CO)[C@@H](O)[C@H]1O		CHEMBL4865575	O=C(Nc1ccccc1)c1cc2cc(O)c(O)cc2o1
CHEMBL3339399	O=C(Nc1ccc(F)cc1)c1nccnc1C(=O)Nc1ccccc1-c1ccncc1		CHEMBL4572769	COc1ccc(S(=O)(=O)N(CCCC(=O)C2CCCCCC2)c2ccc(C3CCCCC3)cc2)cc1		CHEMBL4462325	O=C(Nc1nc2cc(O)c(O)cc2s1)[C@H]1CCCN1S(=O)(=O)c1ccc([N+](=O)[O-])cc1
CHEMBL3339404	Cc1ccc(NC(=O)c2nccnc2C(=O)Nc2ccc(C)cc2-c2cccnc2)cc1		CHEMBL4437465	O=C(CCCN(c1ccccc1)S(=O)(=O)c1ccc(Oc2ccccc2)cc1)C1CCCCCC1		CHEMBL4571778	C[C@@H](c1ccc(Cl)cc1)n1nnc2c1NC(=O)C[C@]21C(=O)N(CCN2CCOCC2)c2ccc(Cl)cc21
CHEMBL3339394	Cc1ccc(NC(=O)c2nc[nH]c2C(=O)NCCc2ccc(F)cc2)c(-c2ccco2)c1		CHEMBL2413440	Nc1ncnc2c1c1cc(-c3ccsc3)ccc1n2[C@@H]1O[C@H](CO)[C@@H](O)[C@H]1O		CHEMBL4459375	C[C@@H](c1ccc(Cl)cc1)n1nnc2c1NC(=O)C[C@]21C(=O)N(CCN(C)CCS(C)(=O)=O)c2ccc(Cl)cc21
CHEMBL1631356	CC(=O)c1cccc(-c2ccc(-c3ccnc(NC4CC(C)(C)NC(C)(C)C4)n3)s2)c1		CHEMBL3234982	O=C(c1ccc(O)cc1)c1nc2ccccc2cc1-c1ccc(OCCN2CCCC2)cc1		CHEMBL4593413	C[C@@H](c1ccc(Cl)cc1)n1nnc2c1NC(=O)C[C@]21C(=O)N(CCCCCCCCCCN(C)C)c2ccc(Cl)cc21
CHEMBL1652120	C[C@@H]1CCCCC1OCCCCCCN1C[C@H](O)[C@@H](O)[C@H](O)[C@H]1CO		CHEMBL341590	CCCCOc1cccc2nc(N)nc(N)c12		CHEMBL4472422	C[C@@H](c1ccc(Cl)cc1)n1nnc2c1NC(=O)C[C@]21C(=O)N(CCCCN(C)C)c2ccc(Cl)cc21
CHEMBL97771	COc1cc2ncnc(Nc3ccc(Oc4ccccc4)cc3)c2cc1OC		CHEMBL2042314	Nc1nc(N)c2cc(Oc3ccccc3)ccc2n1		CHEMBL4291207	COc1ccccc1-c1nn(Cc2ccc(NC(=O)OCCCCN(C)C)cc2)c(=O)c2ccccc12
CHEMBL225045	Nc1nc(O)c2[nH]cc([C@@H]3C=C(CO)[C@@H](O)[C@H]3O)c2n1		CHEMBL2042326	CC(C)(C)Sc1cccc2nc(N)nc(N)c12		CHEMBL4857936	CNc1nc(Nc2cccc(F)c2)c2nc[nH]c2n1
CHEMBL3578036	Cc1cn([C@H]2C[C@H](n3nncc3-c3ccc(Oc4ccccc4)cc3)[C@@H](CO[Si](C)(C)C(C)(C)C)O2)c(=O)[nH]c1=O		CHEMBL4585392	Cn1ccc2c1c1c(-c3ccoc3)ncnc1n2[C@@H]1O[C@H](CO)[C@@H](O)[C@H]1O		CHEMBL4870033	COC(=O)c1cccc(Nc2nc(NCCOc3ccccc3)nc3[nH]cnc23)c1
CHEMBL3754027	Nc1ncc(Br)c2c1ncn2C1=C[C@@H](CO)[C@H](O)[C@@H]1O		CHEMBL4470770	Cn1ccc2c1c1c(-c3cc4ccccc4o3)ncnc1n2[C@@H]1O[C@H](CO)[C@@H](O)[C@H]1O		CHEMBL4868219	Fc1cccc(Nc2nc(NCCOc3ccccc3)c3nc[nH]c3n2)c1
CHEMBL541462	CSc1ncnc2c([C@H]3C=C[C@@H](CO)O3)scc12		CHEMBL4462448	CN(C)c1ncnc2c1c1ccn(C)c1n2[C@@H]1O[C@H](CO)[C@@H](O)[C@H]1O		CHEMBL4847429	Fc1cccc(NNc2nc(NCCOc3ccccc3)nc3[nH]cnc23)c1
CHEMBL3339383	Cc1cc(-c2ccccc2NC(=O)c2nc[nH]c2C(=O)Nc2ccc(F)cc2)[nH]n1		CHEMBL4438098	OC[C@H]1O[C@@H](n2c3ccoc3c3c(-c4cc5ccccc5o4)ncnc32)[C@H](O)[C@@H]1O		CHEMBL4858411	CNc1nc(Nc2cccc(C(F)(F)F)c2)c2nc[nH]c2n1
CHEMBL269277	C=C(C)[C@@H]1CC[C@]2(C(=O)O)CC[C@]3(C)[C@H](CC[C@@H]4[C@@]5(C)CC[C@H](O)C(C)(C)[C@@H]5CC[C@]43C)[C@@H]12		CHEMBL4644735	C=C(C#Cc1cc(O[C@@H]2O[C@@H](C)[C@H](O)[C@@H](O)[C@H]2O)ccc1O)CC/C=C(\C)CC/C=C(\C)C(=O)O		CHEMBL4073835	O=C(NC1CCCC1)[C@H]1CN(c2ccc(C(F)(F)F)cc2)CC(=O)N1c1ccc2ccsc2c1
CHEMBL471282	O=c1c(O[C@@H]2O[C@@H](CO)[C@H](O)[C@H]2O)c(-c2ccc(O)c(O)c2)oc2cc(O)cc(O)c12		CHEMBL4648830	O=C(NCc1ccc(O)cc1)c1cc(-c2ccccc2)c(=O)n2c1sc1ccc(OC3CCCCC3)cc12		CHEMBL4745206	O=C(NCc1ccccc1-c1ccsc1)c1nccnc1C(=O)Nc1ccc(F)cc1
CHEMBL2397388	C[C@H](O)C[C@H]1C[C@@H](n2cnc3c(N)ncnc32)[C@H](O)[C@@H]1O		CHEMBL4645844	O=C(NCCO)c1cc(-c2ccccc2)c(=O)n2c1sc1ccc(OC3CCCCC3)cc12		CHEMBL4439128	COc1ccc(-c2cnc3[nH]cc(C#Cc4cccnc4)c3c2)cc1OC
CHEMBL1631358	CC1(C)CC(Nc2nccc(-c3ccc(-c4ccc(Cl)cc4)s3)n2)CC(C)(C)N1		CHEMBL3735551	O=C(O)COc1ccc(-n2nc3ccccc3[n+]2[O-])cc1		CHEMBL4277791	OC[C@H]1O[C@@H](n2c3ccc(Cl)cc3c3c(Cl)ncnc32)[C@H](F)[C@@H]1O
CHEMBL3085958	Cc1cn([C@H]2C[C@H](n3nncc3-c3cccc4ccccc34)[C@@H](CO)O2)c(=O)[nH]c1=O		CHEMBL3736362	Cc1ccc2nn(-c3ccc(OC(C)(C)C(=O)O)cc3)nc2c1		CHEMBL4284758	OC[C@H]1O[C@@H](n2c3ccc(Cl)cc3c3c(-c4ccccc4)ncnc32)[C@H](F)[C@@H]1O
CHEMBL1835499	Cc1cc(C)cc(Cc2cc(Cl)ccc2OCCn2ccc(=O)[nH]c2=O)c1		CHEMBL3735430	Clc1cc2nn(Cc3ccccc3)nc2cc1Cl		CHEMBL4749613	COc1cc(Nc2ncnc3ccc(F)cc23)cc(OC)c1OC
CHEMBL3339397	Cc1ccc(NC(=O)c2nccnc2C(=O)Nc2ccc(F)cc2)c(-c2cccnc2)c1		CHEMBL457	Cc1ccc(C)c(OCCCC(C)(C)C(=O)O)c1		CHEMBL4759036	CC(C)(C)[C@H](NC(=O)[C@H](CCCNC(=N)N)NC(=O)Cc1ccc(CNC(=N)N)cc1)C(=O)N[C@@H](CCCNC(=N)N)C(=O)NCc1ccc(C(=N)N)cc1
CHEMBL2348380	CC(C)(C)CC(=O)N(CCCCCCN1C[C@H](O)[C@@H](O)[C@H](O)[C@H]1CO)C1CCCCC1		CHEMBL3335494	N=C(N)NCCC[C@H](NC(=O)c1ccccc1)C(=O)N[C@@H](CCCCN)C(=O)N[C@H](C(N)=O)c1ccccc1		CHEMBL4868418	N/C(=N\O)c1cccc(-c2ccc3c(c2)c2cc(-c4cccc(/C(N)=N/O)c4)ccc2n3S(=O)(=O)c2ccc(Br)cc2)c1
CHEMBL2348370	CC(C)(C)C(=O)N(CCCCCCN1C[C@H](O)[C@@H](O)[C@H](O)[C@H]1CO)C12CC3CC(CC(C3)C1)C2		CHEMBL2163423	OC[C@@H]1[C@@H](O)[C@H](O)[C@@H](O)CN1CCCCCCOc1c(F)c(F)c(F)c(F)c1F		CHEMBL4860581	COc1cc2c(cc1C(=O)Nc1ccc(C(C)(C)C#N)cc1)CCCCC2
CHEMBL2348383	CC1CCCCC1N(CCCCCCN1C[C@H](O)[C@@H](O)[C@H](O)[C@H]1CO)C(=O)C(C)(C)C		CHEMBL438605	C[C@@]1(O)[C@H](O)[C@@H](CO)O[C@H]1n1ccc(N)nc1=O		CHEMBL4793494	CC1(C)CC(=O)C2=C(C1)N(c1ccccc1)C(c1ccc(Br)cc1)N(c1ccc(F)cc1)C2
CHEMBL2348382	CC(C)(C)C(=O)N(CCCCCCN1C[C@H](O)[C@@H](O)[C@H](O)[C@H]1CO)C1CCCCC1		CHEMBL549789	CC(C)CC[C@@H](O)[C@](C)(O)[C@H]1CC[C@@]2(O)C3=CC(=O)[C@@H]4C[C@@H](O)[C@@H](O)C[C@]4(C)[C@H]3CC[C@]12C		CHEMBL4853962	Nc1nccc2c1ncn2[C@@H]1C(F)=C[C@@H](O)[C@H]1O
CHEMBL2348379	CC(C)(C)C(=O)N(CCCCCCN1C[C@H](O)[C@@H](O)[C@H](O)[C@H]1CO)c1ccc(F)cc1F		CHEMBL3793940	CC(=O)OC(C)(C)CC[C@@H](O)[C@](C)(O)[C@H]1CC[C@@]2(O)C3=CC(=O)[C@@H]4C[C@@H](O)[C@@H](O)C[C@]4(C)[C@H]3[C@H](O)C[C@]12C		CHEMBL4864364	Nc1nccc2c1ncn2[C@H]1C(F)=C[C@H](O)[C@@H]1O
CHEMBL3578050	COc1ccc2cc(C(=O)N[C@H]3C[C@H](n4cc(C)c(=O)[nH]c4=O)O[C@@H]3CO)ccc2c1		CHEMBL3628513	C[C@]1(CO)O[C@@H](n2cc(I)c3c(N)ncnc32)[C@H](O)[C@@H]1O		CHEMBL4553551	NS(=O)(=O)c1ccc(Nc2nc(N3CCOCC3)nc3c2CN(CCOc2ccccc2)C3=O)cc1
CHEMBL3578049	COc1ccc2cc(C(=O)N[C@H]3C[C@H](n4cc(C)c(=O)[nH]c4=O)O[C@@H]3CO[Si](C)(C)C(C)(C)C)ccc2c1		CHEMBL3628518	C#Cc1cn([C@@H]2O[C@](C)(CO)[C@@H](O)[C@H]2O)c2ncnc(N)c12		CHEMBL4451460	O=C(NCCOc1ccccc1)c1nc(N2CCOCC2)nc(Nc2cccc(O)c2)c1CO
CHEMBL3578037	Cc1cn([C@H]2C[C@H](n3nncc3COc3ccccc3)[C@@H](CO[Si](C)(C)C(C)(C)C)O2)c(=O)[nH]c1=O		CHEMBL3426583	O=C1Nc2ccc(Cl)cc2C12CCNc1c2cnn1Cc1ccc(Cl)cc1		CHEMBL4858512	NC(=O)c1cccc(NC(=O)[C@@H](NC(=O)c2ccc(Oc3ccccc3)cc2)c2ccc(OCc3ccccc3)cc2)c1
CHEMBL3578059	Cc1cn([C@H]2C[C@H](NC(=O)c3c[nH]c4ccccc34)[C@@H](CO[Si](C)(C)C(C)(C)C)O2)c(=O)[nH]c1=O		CHEMBL3401561	COc1ccc(C2=NN(c3nc(-c4ccc(-c5ccccc5)cc4)cs3)C(c3ccc(O)c(OC)c3)C2)cc1		CHEMBL4859856	NC(=O)c1cccc(NC(=O)[C@@H](NC(=O)c2ccc(Oc3ccc(C(F)(F)F)cc3)cc2)c2ccc(OCc3ccccc3)cc2)c1
CHEMBL3578053	Cc1cn([C@H]2C[C@H](NC(=O)C(c3ccccc3)(c3ccccc3)c3ccccc3)[C@@H](CO[Si](C)(C)C(C)(C)C)O2)c(=O)[nH]c1=O		CHEMBL3735991	CC(C)(COc1ccc(-n2nc3ccc(Cl)cc3n2)cc1)C(=O)O		CHEMBL4782091	CC1(C)CC(=O)C2=C(C1)N(c1cccc(Cl)c1)C(c1ccc(Br)cc1)N(c1ccc(Cl)cc1)C2
CHEMBL3578052	Cc1cn([C@H]2C[C@H](NC(=O)c3c4ccccc4cc4ccccc34)[C@@H](CO)O2)c(=O)[nH]c1=O		CHEMBL3426547	O=C1CC2(C(=O)Nc3ccc(Cl)cc32)c2cnn(Cc3ccc(C(F)(F)F)cc3)c2N1		CHEMBL4542495	CCCCCCCCCCN1[C@H](CO)[C@@H](O)[C@H](O)[C@H]1CNC(=O)C1Cc2ccccc21
CHEMBL2397387	C[C@@H](O)C[C@H]1C[C@@H](n2cnc3c(N)ncnc32)[C@H](O)[C@@H]1O		CHEMBL4637410	O=C1CC2(C(=O)Nc3ccc(Cl)cc32)c2c(C3CC3)nn(Cc3ccc(Cl)cc3)c2N1		CHEMBL1652085	CO[C@H]1[C@@H](C(=O)c2cnc3sc(C(=O)c4ccc(Br)cc4)cn23)O[C@@H]2OC(C)(C)O[C@@H]21
CHEMBL2165927	OC[C@@H]1[C@@H](O)[C@H](O)[C@@H](O)CN1CCCCCCOCc1ccccc1		CHEMBL4527096	COc1ccc(S(=O)(=O)N(CCCC(=O)c2ccc(F)cc2)c2ccccc2)cc1		CHEMBL1901079	NC(=O)C1(N2CCCCC2)CCN(C(=O)CSc2nc3ccccc3o2)CC1
CHEMBL3339384	O=C(NCc1ccccc1-c1ccncc1)c1nc[nH]c1C(=O)Nc1ccc(F)cc1		CHEMBL4556306	COc1ccc(S(=O)(=O)N(CCCC(=O)C2CCCCCC2)c2ccccc2)cc1		CHEMBL4852930	COc1cc2c(cc1C(=O)Nc1ccc(C(C)(C)C)cc1)CCCCC2
CHEMBL3334764	Nc1ncnc2c1ncn2C1=C[C@@H](CO)[C@H](O)[C@@H]1O		CHEMBL3629293	CCOC(=O)[C@H](C)NP(=O)(OC[C@@]1(C)O[C@@H](n2cc(-c3ccco3)c3c(N)ncnc32)[C@H](O)[C@@H]1O)Oc1ccccc1		CHEMBL4642739	CCOCc1cn(-c2cccc(S(=O)(=O)Nc3ccccc3N3CCOCC3)c2)nn1
CHEMBL3740025	O=C1N[C@@H](Cc2ccccc2)C(=O)N2C[C@H](O)C[C@@H]12		CHEMBL3629294	CCOC(=O)[C@H](C)NP(=O)(OC[C@@]1(C)O[C@@H](n2cc(-c3cccs3)c3c(N)ncnc32)[C@H](O)[C@@H]1O)Oc1ccccc1		CHEMBL4785284	CC(C)(CC(=O)O)NC(=O)c1cc(-c2ccccc2)c(=O)n2c1sc1ccc(OC3CCCCC3)cc12
CHEMBL2348374	CC(C)(C)C(=O)N(CCCCCCN1C[C@H](O)[C@@H](O)[C@H](O)[C@H]1CO)C1CCCC1		CHEMBL2440340	CCCC[C@H](NC(=O)[C@H](CCCCN)NC(=O)[C@H](CCCNC(=N)N)NC(=O)c1cccs1)C(N)=O		CHEMBL4763021	Cc1cc(-c2ccccc2NC(=O)c2ccccc2C(=O)Nc2ccc(F)cc2)[nH]n1
CHEMBL3769592	CCN1CCN([C@@H](c2ccccc2)c2ccc(Cl)cc2)CC1		CHEMBL4466463	NS(=O)(=O)c1ccc(Nc2nc(N3CCOCC3)nc(C(=O)NCc3ccccc3)c2CO)cc1		CHEMBL4758496	O=C(NCc1ccccc1-c1ccsc1)c1ccccc1C(=O)Nc1ccc(F)cc1
CHEMBL470183	Nc1ncnc2c([C@H]3C=C[C@@H](CO)O3)scc12		CHEMBL4447228	Cc1ccc(-c2ccc(Nc3ccnc(NCCN4CCOCC4)n3)cc2)cc1		CHEMBL3764484	Clc1cccc(-c2noc(/C=C/c3ccc(Br)s3)n2)c1
CHEMBL445863	OC[C@@H]1CC[C@H](c2scc3c(O)ncnc23)O1		CHEMBL4461976	CN1CCN(c2nccc(Nc3ccc(-c4cccc(Cl)c4)cc3)n2)CC1		CHEMBL3740519	CC(C)(C)c1ccc(COc2ccc([C@@H](NC(=O)[C@H](CCCCN)NC(=O)[C@H](CCCNC(=N)N)NC(=O)c3ccc(Cl)s3)C(N)=O)cc2)cc1
CHEMBL29197	COc1cc2ncnc(Nc3cccc(Br)c3)c2cc1OC		CHEMBL4589943	CC1(C)CC(Nc2nccc(Nc3ccc(-c4ccccc4)cc3)n2)CC(C)(C)N1		CHEMBL3764461	COc1cccc(-c2nnc(/C=C/c3ccc(Br)s3)o2)c1
CHEMBL296407	N#C/C(=C\c1ccc(O)c(O)c1)C(N)=O		CHEMBL4166525	Cc1ccccc1C1CC(c2ccc(Oc3ccccc3)cc2)=NN1c1ccc(S(N)(=O)=O)cc1		CHEMBL3763180	O=C(/C=C/c1ccc(Br)s1)Nc1ccc(Cl)c(Cl)c1
CHEMBL3088184	Cc1cn([C@H]2C[C@H](n3nncc3-c3ccc(Oc4ccccc4)cc3)[C@@H](CO)O2)c(=O)[nH]c1=O		CHEMBL4126945	C#C[C@@]1(O)[C@H](O)[C@@](F)(CO[P@@](=O)(N[C@@H](C)C(=O)OC(C)C)Oc2ccccc2)O[C@H]1n1ccc(=O)[nH]c1=O		CHEMBL4581527	COc1ccc(CNc2ccnc(NC3CC(C)(C)NC(C)(C)C3)n2)cc1
CHEMBL3088188	Cc1cn([C@H]2C[C@H](n3nncc3C3CC3)[C@@H](CO)O2)c(=O)[nH]c1=O		CHEMBL4128303	C#C[C@@]1(F)[C@H](O)[C@@H](CO[P@@](=O)(N[C@@H](C)C(=O)OC(C)C)Oc2ccccc2)O[C@H]1n1ccc(=O)[nH]c1=O		CHEMBL4469775	Cc1ccc(-c2ccc(Nc3ccnc(N4CCN(C)CC4)n3)cc2)cc1
CHEMBL3339400	O=C(Nc1ccc(F)cc1)c1nccnc1C(=O)Nc1ccccc1-c1cccnc1		CHEMBL4449833	Nc1nccc2c1ncn2C1=CC[C@H](O)[C@@H]1O		CHEMBL4213128	CS(=O)(=O)c1cccc(NC(C(=O)c2c[nH]c3ccccc23)c2ccccc2)c1
CHEMBL4212027	Nc1ncnc2c1ncn2[C@@H]1O[C@H](CO)[C@@H](O)C1(Br)Br		CHEMBL3734945	COc1ccccc1N1CCN(CCCOc2ccc(-n3nc4ccc(C(F)(F)F)cc4n3)cc2)CC1		CHEMBL3628519	C[C@]1(CO)O[C@@H](n2ccc3c(-c4cc5ccccc5o4)ncnc32)[C@H](O)[C@@H]1O
CHEMBL3339401	O=C(NCc1ccccc1-c1ccncc1)c1nccnc1C(=O)Nc1ccc(F)cc1		CHEMBL3736219	FC(F)(F)c1ccc2nn(Cc3ccccc3)nc2c1		CHEMBL4080470	CSc1cccc(N2C(=O)CN(c3ccccc3)CC2(C)C(=O)NC2CCCC2)c1
CHEMBL3339402	Cc1ccc(NC(=O)c2nccnc2C(=O)Nc2ccc(F)cc2)c(-c2ccncc2)c1		CHEMBL3734762	COc1ccc(Cn2nc3cc(Cl)c(Cl)cc3n2)cc1		CHEMBL4077665	O=C(NC(=S)N1CCc2ccccc21)c1ccc(C#Cc2ccccc2)nc1
CHEMBL3339405	Cc1ccc(NC(=O)c2nccnc2C(=O)NCc2ccc(-c3cccnc3)cc2)cc1		CHEMBL4096946	N=C(N)NCCC[C@@H]1NC(=O)[C@H](CCCCN)NC(=O)[C@H]2CCCN2C(=O)[C@@H](Cc2ccccc2)NC(=O)[C@H](CO)NC(=O)[C@H](Cc2ccc(-c3ccccc3)cc2)NC(=O)[C@H](CO)NC(=O)[C@H](CCCCN)NC1=O		CHEMBL2087143	CC(C)(O)CC[C@@H](O)[C@](C)(O)[C@H]1CC[C@@]2(O)C3=CC(=O)[C@@H]4C[C@@H](O)CC[C@]4(C)[C@H]3CC[C@]12C
CHEMBL3339406	Cc1ccc(NC(=O)c2nccnc2C(=O)Nc2ccccc2-c2ccncc2)cc1		CHEMBL2403295	O=c1[nH]c(=O)n([C@@H]2O[C@H](CO)[C@@H](O)[C@H]2OC(c2ccccc2)(c2ccccc2)c2ccccc2)cc1Cl		CHEMBL3792779	CC(=O)O[C@@H]1C[C@H]2C(=O)C=C3[C@H](CC[C@]4(C)[C@@H]([C@@](C)(O)[C@H](O)CCC(C)(C)O)CC[C@@]34O)[C@@]2(C)C[C@@H]1O
CHEMBL3339382	Cc1ccc(NC(=O)c2nc[nH]c2C(=O)Nc2ccc(F)cc2)c(-c2cc(C)n[nH]2)c1		CHEMBL2403290	Cc1cn([C@H]2C[C@H](O)[C@@H](COC(c3ccccc3)(c3ccccc3)c3ccccc3)O2)c(=O)[nH]c1=O		CHEMBL549300	C[C@H]([C@H](O)CCC(C)(C)O)[C@H]1CC[C@@]2(O)C3=CC(=O)[C@@H]4C[C@@H](O)[C@@H](O)C[C@]4(C)[C@H]3CC[C@]12C
CHEMBL1631360	CC1(C)CC(Nc2nc(-c3ccc(-c4ccc(Cl)cc4)s3)c3ccccc3n2)CC(C)(C)N1		CHEMBL483006	C=C1[C@@H]2CC[C@@]3(C)[C@H](c4ccoc4)OC(=O)C[C@]13O[C@H]1CC(=O)C(C)(C)[C@H](CC(=O)OC)[C@]12C		CHEMBL4277730	CN(C)CCCCN(C(=O)O)c1ccc(N2N=C(c3ccc(F)cc3)C3C=CC=CC3C2=O)cc1
CHEMBL21156	CC(C)(C)c1nc2c3ccc(F)cc3c3c(=O)[nH]ccc3c2[nH]1		CHEMBL3401562	COc1ccc(C2=NN(c3nc(-c4ccc(-c5ccccc5)cc4)cs3)C(c3ccc(O)cc3)C2)cc1		CHEMBL4285286	CN(C)CCCCOC(=O)Nc1ccc(Cn2nc(-c3cccc(C#N)c3)c3ccccc3c2=O)cc1
CHEMBL4558188	C=C[C@]1(C)C[C@]23O[C@@H](OC(C)=O)C4([C@@H](O)CCC(C)(C)[C@@H]4C(=O)[C@H]2OC(C)=O)[C@H]3C[C@@H]1O		CHEMBL1324	Cc1ccc(C(=O)c2cc(O)c(O)c([N+](=O)[O-])c2)cc1		CHEMBL4648032	O=C1CC2(C(=O)Nc3ccc(Cl)cc32)c2cnn(Cc3ccc(C(=O)O)cc3)c2N1
CHEMBL4097787	Nc1ncc(Br)c2c1ncn2[C@H]1C=C[C@H](O)[C@@H]1O		CHEMBL4587495	CCCCC1C(C(=O)CC)C(c2ccccc2)CCN1C(=O)OC(C)(C)C		CHEMBL4791271	COc1cc(Nc2ncnc3ccc(C#N)cc23)cc(OC)c1OC
CHEMBL2165929	CCCOc1cccc(CCCN2C[C@H](O)[C@@H](O)[C@H](O)[C@H]2CO)c1		CHEMBL4521186	CCOC(CN1C(=O)[C@]2(CC(=O)Nc3c2nnn3[C@@H](C)c2ccc(Cl)cc2)c2cc(Cl)ccc21)OCC		CHEMBL4754479	COc1cc(Nc2c(C#N)cnc3ccc(Cl)cc23)cc(OC)c1OC
CHEMBL3578024	COc1ccc2cc(-c3cnnn3[C@H]3C[C@H](n4cc(C)c(=O)[nH]c4=O)O[C@@H]3CO[Si](C)(C)C(C)(C)C)ccc2c1		CHEMBL4574576	CC[C@H](C)[C@H](NC(=O)[C@H]1O[C@H](O[C@H]2CC[C@@]3(C)[C@@H](CC[C@]4(C)[C@@H]3C(=O)C=C3[C@@H]5C[C@@](C)(C(=O)N[C@H](C(=O)OC)[C@@H](C)CC)CC[C@]5(C)CC[C@]34C)C2(C)C)[C@H](O[C@@H]2O[C@H](C(=O)N[C@H](C(=O)OC)[C@@H](C)CC)[C@@H](O)[C@H](O)[C@H]2O)[C@@H](O)[C@@H]1O)C(=O)OC		CHEMBL4741690	Cc1ccc(NC(=O)c2ccccc2C(=O)Nc2ccc(F)cc2)c(-c2cccs2)c1
CHEMBL3578062	Cc1cn([C@H]2C[C@H](NC(=O)CCCCc3ccc(F)cc3)[C@@H](CO[Si](C)(C)C(C)(C)C)O2)c(=O)[nH]c1=O		CHEMBL479092	Cc1ccc(OC[C@H]2O[C@@H](n3cc(Cn4ccc(N)nc4=O)nn3)C[C@@H]2Oc2ccc(C)cc2)cc1		CHEMBL4749758	Cc1ccc(NC(=O)c2nccnc2C(=O)NCc2ccc(-c3ccsc3)cc2)cc1
CHEMBL3578064	Cc1cn([C@H]2C[C@H](NC(=O)Nc3cccc4ccccc34)[C@@H](CO[Si](C)(C)C(C)(C)C)O2)c(=O)[nH]c1=O		CHEMBL478429	Nc1ncnc2c1ccn2Cc1cn([C@H]2C[C@H](O)[C@@H](CO)O2)nn1		CHEMBL4779769	NC(=O)CCNC(=O)c1cc(-c2ccccc2)c(=O)n2c1sc1ccc(OC3CCCCC3)cc12
CHEMBL3604364	Nc1nc(F)cc2c1ncn2[C@@H]1C=C(CCO)[C@@H](O)[C@H]1O		CHEMBL3401564	COc1ccc(/C(C)=N/Nc2nc(-c3ccc(-c4ccccc4)cc3)cs2)cc1		CHEMBL4781620	CC1(C)CC(=O)C2=C(C1)N(c1ccc(F)cc1)C(c1ccc(Br)cc1)N(c1ccc(Cl)cc1)C2
CHEMBL3339390	Cc1ccc(NC(=O)c2nc[nH]c2C(=O)Nc2ccc(F)cc2)c(-c2ccco2)c1		CHEMBL2016759	C=C[C@@]1(c2ccc3c(N)ncnn23)O[C@H](CO)[C@@H](O)[C@H]1O		CHEMBL530635	COc1cc(Nc2ccnc3ccc(C(C)(C)C)cc23)cc(OC)c1OC
CHEMBL304087	COc1cc(NC(=O)Nc2cccc(CNC(=O)O[C@H]3CCOC3)c2)ccc1-c1cnco1		CHEMBL2016760	C#C[C@@]1(c2ccc3c(N)ncnn23)O[C@H](CO)[C@@H](O)[C@H]1O		CHEMBL4740761	COc1cc(-c2cnc3c(-c4cccc(NC(=O)N5CCCC5)c4)snc3c2)ccc1N
CHEMBL3339389	Cc1ccc(NC(=O)c2nc[nH]c2C(=O)Nc2ccc(F)cc2)c(-c2ccsc2)c1		CHEMBL4644016	CCOCc1cn(-c2cccc(S(=O)(=O)Nc3ccccc3NS(C)(=O)=O)c2)nn1		CHEMBL4474234	OCCN1CCN(c2nccc(Nc3ccc(-c4ccccc4)cc3)n2)CC1
CHEMBL3339407	Cc1ccc(NC(=O)c2nccnc2C(=O)Nc2ccccc2-c2cccnc2)cc1		CHEMBL4458744	COc1ccc(/C=C\c2cc(OC)c(OC)c(OC)c2)cc1NC(=O)CNC(=O)[C@H](CCCNC(=N)N)NC(=O)[C@H](CCCNC(=N)N)NC(=O)c1ccccc1		CHEMBL4867306	N/C(=N\O)c1cccc(-c2ccc3c(c2)c2cc(-c4cccc(/C(N)=N/O)c4)ccc2n3S(=O)(=O)c2ccccc2Cl)c1
CHEMBL3578043	Cc1cn([C@H]2C[C@H](N3C(=O)CSC3c3ccccc3)[C@@H](CO[Si](C)(C)C(C)(C)C)O2)c(=O)[nH]c1=O		CHEMBL4467626	Cc1ccc(Nc2ccnc(NCCN3CCOCC3)n2)cc1		CHEMBL4860668	N/C(=N\O)c1cccc(-c2ccc3c(c2)c2cc(-c4cccc(/C(N)=N/O)c4)ccc2n3S(=O)(=O)c2ccccc2C(F)(F)F)c1
CHEMBL251254	O=c1c(O[C@@H]2O[C@H](CO)[C@H](O)[C@H](O)[C@H]2O)c(-c2ccc(O)c(O)c2)oc2cc(O)cc(O)c12		CHEMBL4455669	c1ccc(-c2ccc(Nc3ccnc(OCCN4CCOCC4)n3)cc2)cc1		CHEMBL4848267	COc1ccc(S(=O)(=O)n2c3ccc(-c4cccc(/C(N)=N/O)c4)cc3c3cc(-c4cccc(/C(N)=N/O)c4)ccc32)c(OC)c1
CHEMBL3341815	COC(=O)N[C@H](C(=O)N1CCC[C@@H]1c1ncc(C#CC#Cc2ccc(-c3cnc([C@H]4CCCN4C(=O)[C@@H](NC(=O)OC)C(C)C)[nH]3)cc2)[nH]1)C(C)C.Cl		CHEMBL4537569	Cc1ccc(-c2ccc(Nc3ccnc(NC4CC(C)(C)NC(C)(C)C4)n3)cc2)cc1		CHEMBL4864411	N/C(=N\O)c1cccc(-c2ccc3c(c2)c2cc(-c4cccc(/C(N)=N/O)c4)ccc2n3S(=O)(=O)c2ccccc2Br)c1
CHEMBL3578060	Cc1cn([C@H]2C[C@H](NC(=O)c3c[nH]c4ccccc34)[C@@H](CO)O2)c(=O)[nH]c1=O		CHEMBL4068097	C=CC(=O)N1CCc2ccc(-n3c(=O)ccc4cnc5ccc(-c6ccc(S(=O)(=O)NC(C)(C)C)cc6)cc5c43)cc21		CHEMBL4879110	N=C(N)c1cccc(-c2ccc3c(c2)c2cc(-c4cccc(C(=N)N)c4)ccc2n3S(=O)(=O)c2cccc(OC(F)(F)F)c2)c1
CHEMBL3578055	Cc1cn([C@H]2C[C@H](NC(=O)c3cccc4ccccc34)[C@@H](CO[Si](C)(C)C(C)(C)C)O2)c(=O)[nH]c1=O		CHEMBL4075268	C=CC(=O)Nc1cc(-n2c(=O)ccc3cnc4ccc(Nc5cnn(C)c5)cc4c32)ccc1C		CHEMBL4869190	N/C(=N\O)c1cccc(-c2ccc3c(c2)c2cc(-c4cccc(/C(N)=N/O)c4)ccc2n3S(=O)(=O)c2cccc(Br)c2)c1
CHEMBL3578031	COc1ccc(C(OC[C@H]2O[C@@H](n3cc(C)c(=O)[nH]c3=O)C[C@@H]2n2nncc2-c2ccc3cc(OC)ccc3c2)(c2ccccc2)c2ccc(OC)cc2)cc1		CHEMBL4452133	CC1(C)[C@@H](O[C@H]2O[C@H](C(=O)N[C@@H](Cc3ccc(O)cc3)C(=O)O)[C@@H](O)[C@H](O)[C@H]2O[C@@H]2O[C@H](C(=O)N[C@@H](Cc3ccc(O)cc3)C(=O)O)[C@@H](O)[C@H](O)[C@H]2O)CC[C@@]2(C)[C@H]1CC[C@]1(C)[C@@H]2C(=O)C=C2[C@@H]3C[C@@](C)(C(=O)N[C@@H](Cc4ccc(O)cc4)C(=O)O)CC[C@]3(C)CC[C@]21C		CHEMBL4853944	NC(=O)c1cccc(NC(=O)[C@@H](NC(=O)c2ccc(-c3ccc(Cl)cc3)cc2)c2ccc(OCc3ccccc3)cc2)c1
CHEMBL3578027	COc1ccc2cc(-c3cnnn3[C@H]3C[C@H](n4cc(C)c(=O)[nH]c4=O)O[C@@H]3COC(C)=O)ccc2c1		CHEMBL4531080	COC(=O)[C@@]1(C)CC[C@]2(C)CC[C@]3(C)C(=CC(=O)[C@@H]4[C@@]5(C)CC[C@H](O[C@H]6O[C@H](C(=O)NN)[C@@H](O)[C@H](O)[C@H]6O[C@@H]6O[C@H](C(=O)NN)[C@@H](O)[C@H](O)[C@H]6O)C(C)(C)[C@@H]5CC[C@]43C)[C@@H]2C1		CHEMBL3581152	COc1ccc(Cn2c(C)cc(OCc3cccc(F)c3)cc2=O)cc1
CHEMBL3085966	COc1ccc2cc(-c3cnnn3[C@H]3C[C@H](n4cc(C)c(=O)[nH]c4=O)O[C@@H]3CO)ccc2c1		CHEMBL4474038	COC(=O)[C@H](Cc1ccc(O)cc1)NC(=O)[C@H]1O[C@H](O[C@H]2CC[C@@]3(C)[C@@H](CC[C@]4(C)[C@@H]3C(=O)C=C3[C@@H]5C[C@@](C)(C(=O)N[C@@H](Cc6ccc(O)cc6)C(=O)OC)CC[C@]5(C)CC[C@]34C)C2(C)C)[C@H](O[C@@H]2O[C@H](C(=O)N[C@@H](Cc3ccc(O)cc3)C(=O)OC)[C@@H](O)[C@H](O)[C@H]2O)[C@@H](O)[C@@H]1O		CHEMBL3581159	CC(=O)c1ccc(Nc2nc(NCCC(C)C)nc3[nH]cnc23)cc1
CHEMBL224363	O=c1[nH]cc([C@@H]2C=C(CO)[C@@H](O)[C@H]2O)c(=O)[nH]1		CHEMBL4475479	COC(=O)[C@H](CC(C)C)NC(=O)[C@H]1O[C@H](O[C@H]2CC[C@@]3(C)[C@@H](CC[C@]4(C)[C@@H]3C(=O)C=C3[C@@H]5C[C@@](C)(C(=O)N[C@@H](CC(C)C)C(=O)OC)CC[C@]5(C)CC[C@]34C)C2(C)C)[C@H](O[C@@H]2O[C@H](C(=O)N[C@@H](CC(C)C)C(=O)OC)[C@@H](O)[C@H](O)[C@H]2O)[C@@H](O)[C@@H]1O		CHEMBL4633565	CCCCc1cn(-c2ccc(NC(=O)Nc3ccccc3NS(C)(=O)=O)cc2)nn1
CHEMBL4460577	CC[C@@H](c1cc(OC)c(OC)cc1OC)[C@H](C)[C@@H](/C(C)=C/c1cc(OC)c(OC)cc1OC)c1cc(OC)c(OC)cc1OC		CHEMBL503	CC[C@H](C)C(=O)O[C@H]1C[C@@H](C)C=C2C=C[C@H](C)[C@H](CC[C@@H]3C[C@@H](O)CC(=O)O3)[C@H]21		CHEMBL3581165	Oc1cccc(Nc2nc(NCCc3c[nH]cn3)nc3[nH]cnc23)c1
CHEMBL2163421	OC[C@@H]1[C@@H](O)[C@H](O)[C@@H](O)CN1CCCCCCOc1cc(F)ccc1F		CHEMBL4516506	Nc1c(C(=O)Nc2nnc(-c3ccccc3)s2)sc2nc3c(cc12)CCCCC3		CHEMBL4454264	O=c1c2cc(O)c(O)cc2oc2cc(O)c([C@@H]3O[C@H](CO)[C@@H](O)[C@H](O)[C@H]3O/C=C/c3ccccc3)c(O)c12
CHEMBL3339385	O=C(NCc1ccccc1-c1ccsc1)c1nc[nH]c1C(=O)Nc1ccc(F)cc1		CHEMBL4543198	N#C/C(=N\Nc1ccc(C(F)(F)F)cc1)C(=O)c1ccco1		CHEMBL4643096	COc1cc(-c2cnc3c(N4C[C@H](C)O[C@H](C)C4)snc3c2)ccc1C(=O)N1CCCC1
CHEMBL3344315	O=c1c(OC2O[C@H](CO)[C@@H](O)[C@H](O)[C@H]2O)c(-c2ccc(OC3O[C@H](CO)[C@@H](O)[C@H](O)[C@H]3O)c(O)c2)oc2cc(O)cc(O)c12		CHEMBL1877532	Cc1ccc(S(=O)(=O)Nc2cc(SCC(=O)O)c(O)c3ccccc23)cc1[N+](=O)[O-]		CHEMBL1458891	Cc1ccc(C2=NC(=O)/C(=C/c3cc(O)c(O)c(Br)c3)S2)cc1
CHEMBL402947	O=c1c(O)c(-c2ccc(O[C@@H]3O[C@H](CO)[C@@H](O)[C@H](O)[C@H]3O)c(O)c2)oc2cc(O)cc(O)c12		CHEMBL4436496	Nc1cc(N)c(/N=N/c2ccc(S(=O)(=O)Nc3nccs3)cc2)cc1/N=N/c1ccc(S(=O)(=O)Nc2nccs2)cc1		CHEMBL289191	C=C(C)[C@@H]1CC[C@]2(C)CC[C@]3(C)[C@H](CC[C@@H]4[C@@]5(C)CC[C@H](O)C(C)(C)[C@@H]5CC[C@]43C)[C@@H]12
CHEMBL82242	C[C@@H]1O[C@@H](Oc2c(-c3ccc(O)c(O)c3)oc3cc(O)cc(O)c3c2=O)[C@H](O)[C@H](O)[C@H]1O		CHEMBL16901	C=CCc1ccc(O)c(-c2ccc(O)c(CC=C)c2)c1		CHEMBL1221911	C/C(=C\[C@H](C)C(=O)C[C@H](O)CC1CC(=O)NC(=O)C1)[C@@H]1OC(=O)/C=C/CC/C=C/C=C\[C@@H]1C
CHEMBL1835513	Cc1cc(C)cc(C(=O)c2cc(Cl)ccc2OCCCn2ccc(=O)[nH]c2=O)c1		CHEMBL4587069	O=C(NO)c1ncc(CS(=O)(=O)c2ccccc2)c(CO)c1O		CHEMBL4549916	OCCN1CCN(c2nccc(Nc3ccc(Cl)cc3)n2)CC1
CHEMBL225046	Nc1nc(=O)c([C@@H]2C=C(CO)[C@@H](O)[C@H]2O)c[nH]1		CHEMBL4209010	COc1cccc(NC(C(=O)c2c[nH]c3c(C)cccc23)c2ccccc2)c1		CHEMBL3739493	N=C(N)NCCC[C@H](NC(=O)c1cccs1)C(=O)N[C@@H](CCCCN)C(=O)N[C@@H](C(N)=O)c1ccc(OCc2ccc(C(F)(F)F)cc2)cc1
CHEMBL4455964	CC[C@](C)(O)CCCCC[C@H]1C=CC(=O)O1		CHEMBL4548448	CCCCCCN1C(=O)[C@]2(CC(=O)Nc3c2nnn3[C@@H](C)c2ccc(Cl)cc2)c2cc(Cl)ccc21		CHEMBL4790428	CC1(C)CC(=O)C2=C(C1)N(c1ccccc1)C(c1cccc(Br)c1)N(c1ccccc1)C2
CHEMBL4462035	CC1(C)CC(Nc2nccc(Nc3ccc(-c4ccc(Cl)cc4)cc3)n2)CC(C)(C)N1		CHEMBL4521110	C[C@@H](c1ccc(Cl)cc1)n1nnc2c1NC(=O)C[C@]21C(=O)N(CC2CC2)c2ccc(Cl)cc21		CHEMBL4217606	COc1cccc(NC(C(=O)c2c[nH]c3ccccc23)c2ccc(F)cc2)c1
CHEMBL1652118	CC(C)[C@@H]1CC[C@@H](C)CC1OCCCCCCN1C[C@H](O)[C@@H](O)[C@H](O)[C@H]1CO		CHEMBL4435899	CC(C)N1C(=O)[C@]2(CC(=O)N(C(C)C)c3c2nnn3[C@@H](C)c2ccc(Cl)cc2)c2cc(Cl)ccc21		CHEMBL4203212	COc1cccc(NC(C(=O)c2c[nH]c3ccccc23)c2cc3ccccn3n2)c1
CHEMBL1835504	O=C(c1ccccc1)c1cc(Br)ccc1OCCn1ccc(=O)[nH]c1=O		CHEMBL4572212	C[C@@H](c1ccc(Cl)cc1)n1nnc2c1NC(=O)C[C@]21C(=O)N(CCO)c2ccc(Cl)cc21		CHEMBL4216359	COc1cccc(NC(C(=O)c2c[nH]c3cc(F)ccc23)c2ccccc2)c1
CHEMBL1835506	Cc1cc(C)cc(C(=O)c2cc(C)ccc2OCCn2ccc(=O)[nH]c2=O)c1		CHEMBL4447223	C[C@@H](c1ccc(Cl)cc1)n1nnc2c1NC(=O)C[C@]21C(=O)N(CCN2CCCCC2)c2ccc(Cl)cc21		CHEMBL4790628	CC(C)(C)[C@H](NC(=O)[C@H](CCONC(=N)N)NC(=O)Cc1ccc(CNC(=N)N)cc1)C(=O)N[C@@H](CCONC(=N)N)C(=O)NCc1ccc(C(=N)N)cc1
CHEMBL1835516	Cc1cc(C)cc(C(O)c2cc(Cl)ccc2OCCn2ccc(=O)[nH]c2=O)c1		CHEMBL4548394	C[C@@H](c1ccc(Cl)cc1)n1nnc2c1NC(=O)C[C@]21C(=O)N(CCCN(C)C)c2ccc(Cl)cc21		CHEMBL4571759	CCCCc1cn(-c2cccc(S(=O)(=O)Nc3ccccc3C(F)(F)F)c2)nn1
CHEMBL4550739	CC(C)[C@@H]1NC[C@@H](C[C@@]2(O)c3ccccc3N3C(=O)C(C)(C)N[C@@H]32)n2c1nc1ccccc1c2=O		CHEMBL4574618	C[C@@H](c1ccc(Cl)cc1)n1nnc2c1NC(=O)C[C@]21C(=O)N(CCCCCCN(C)C)c2ccc(Cl)cc21		CHEMBL4639795	Cc1ccccc1NC(=O)Nc1ccc(-n2cc(CCC(C)C)nn2)cc1
CHEMBL1835496	Cc1ccc(OCCn2ccc(=O)[nH]c2=O)c(Cc2ccccc2)c1		CHEMBL4528243	C[C@@H](c1ccc(Cl)cc1)n1nnc2c1NC(=O)C[C@@]21C(=O)N(CCOC(=O)CCCCCCCNC(=O)CCCC[C@@H]2SC[C@@H]3NC(=O)N[C@H]23)c2ccc(Cl)cc21		CHEMBL4635666	CCCCCCc1cn(-c2ccc(NC(=O)Nc3ccccc3C(F)(F)F)cc2)nn1
CHEMBL4782838	COc1ncc(-c2cnn(COCCO)c2)c(OC)n1		CHEMBL4454379	CC1(C)CC(Nc2nccc(NCc3ccc(Cl)cc3)n2)CC(C)(C)N1		CHEMBL4640773	N#Cc1ccc(Cn2ncc3c2NC(=O)CC32C(=O)Nc3ccc(Cl)cc32)cc1
CHEMBL3339396	O=C(NCc1ccc(-c2ccncc2)cc1)c1nccnc1C(=O)Nc1ccc(F)cc1		CHEMBL4476488	[O-][n+]1cccc(CNc2nccc(Nc3ccc(-c4ccccc4)cc3)n2)c1		CHEMBL4537135	CC1(C)CC(Nc2nccc(Nc3ccc(Cl)cc3)n2)CC(C)(C)N1
CHEMBL3604362	Nc1ncc(F)c2c1ncn2[C@@H]1C=C(CCO)[C@@H](O)[C@H]1O		CHEMBL2440156	CCCC[C@H](NC(=O)[C@H](CCCCN)NC(=O)[C@H](CCCNC(=N)N)NC(=O)c1ccc(/C=C2\SC(=S)N(c3ccc(Cl)cc3)C2=O)cc1)C(N)=O		CHEMBL4449990	O=C(Nc1ccnc(NCCN2CCOCC2)n1)c1ccc(-c2ccccn2)s1
CHEMBL4215273	CC(C)OC(=O)[C@H](C)N[P@](=O)(OC[C@H]1O[C@@H](n2ccc(=O)[nH]c2=O)C(Br)(Br)[C@@H]1O)Oc1ccccc1		CHEMBL3628515	C[C@]1(CO)O[C@@H](n2cc(-c3cccs3)c3c(N)ncnc32)[C@H](O)[C@@H]1O		CHEMBL4513651	C[C@@H](c1ccc(Cl)cc1)n1nnc2c1NC(=O)C[C@]21C(=O)N(CCCCCCCCN(C)C)c2ccc(Cl)cc21
CHEMBL4216054	CC(C)OC(=O)[C@H](C)N[P@](=O)(OC[C@H]1O[C@@H](n2cnc3c(N)ncnc32)C(Br)(Br)[C@@H]1O)Oc1ccccc1		CHEMBL4533983	Clc1ccc(-c2ccc(Nc3ccnc(NCc4cccnc4)n3)cc2)cc1		CHEMBL3734841	Oc1ccc(-n2nc3ccc(C(F)(F)F)cc3n2)cc1
CHEMBL3339391	Cc1ccc(NC(=O)c2[nH]cnc2C(=O)Nc2ccc(C)cc2-c2ccsc2)cc1		CHEMBL4170698	COc1cc(-c2cnc3c(N4CCC(F)(F)CC4)snc3c2)ccc1N		CHEMBL3736087	[O-][n+]1c2cc(C(F)(F)F)ccc2nn1-c1ccc(O)cc1
CHEMBL3604365	Nc1nc(F)cc2c1ncn2[C@@H]1C[C@H](CO)[C@@H](O)[C@H]1O		CHEMBL3425867	COc1cc(-c2cnc3c(N4CCOCC4)snc3c2)ccc1N		CHEMBL3736357	COc1ccc(-n2nc3ccc(C(F)(F)F)cc3n2)cc1
CHEMBL13485	CCN(CC)CCNC(=O)c1c(C)[nH]c(/C=C2\C(=O)Nc3ccc(Cl)cc32)c1C		CHEMBL4091041	Fc1ccc(-c2cc(-c3ccc4cc(F)ccc4n3)nn2-c2ccccc2)cc1		CHEMBL3735537	C[C@@H](Oc1ccc(-n2nc3ccccc3n2)cc1)C(=O)O
CHEMBL3578054	Cc1cn([C@H]2C[C@H](NC(=O)C(c3ccccc3)(c3ccccc3)c3ccccc3)[C@@H](CO)O2)c(=O)[nH]c1=O		CHEMBL4168337	COc1cc(-c2cnc3c(N4CCS(=O)(=O)CC4)snc3c2)ccc1N		CHEMBL3735011	Cc1cc(-n2nc3ccccc3n2)cc(C)c1OC(C)(C)C(=O)O
CHEMBL38434	Cc1c(-c2ccc(-c3ccccc3F)cc2)nc2ccc(F)cc2c1C(=O)O		CHEMBL4103430	COc1ccc(Cn2cnc3c(Nc4ccc(C)cc4Br)nc(Cl)nc32)cc1		CHEMBL4168760	O=C(CN1C(=O)NC2(CCCc3ccccc32)C1=O)NO
CHEMBL471440	OC[C@H]1O[C@@H](c2scc3c(=S)[nH]cnc23)[C@H](O)[C@@H]1O		CHEMBL4859049	COC(=O)c1cccc(Nc2nc(NCCO)nc3[nH]cnc23)c1		CHEMBL4547425	O=c1c2cc(O)c(O)cc2oc2cc(O)c([C@@H]3O[C@H](CO)[C@@H](O)[C@H](O)[C@H]3O/C=C/c3ccc(O)c(O)c3)c(O)c12
CHEMBL3334763	Nc1ncnc2c1ncn2C1=C[C@H](CO)[C@@H](O)[C@H]1O		CHEMBL4848338	FC(F)(F)c1cccc(Nc2nc(NCCOc3ccccc3)nc3[nH]cnc23)c1		CHEMBL3220044	COc1cc(/C(C#N)=C/c2cc3ccccc3s2)cc(OC)c1OC
CHEMBL3604367	Nc1nc(F)cc2c1ncn2[C@@H]1C[C@H](O)[C@@H](O)[C@H]1O		CHEMBL4872019	FC(F)(F)c1cccc(NNc2nc(NCCOc3ccccc3)nc3[nH]cnc23)c1		CHEMBL4443913	CCCCCCCCCCCCNCCNC(=O)C[C@@]1(O)C[C@@H](O)[C@@H]2OC(C)(C)O[C@@H]2C1
CHEMBL4743114	CCC(CC)COC(=O)[C@H](C)NP(=O)(OCCOCn1cc(-c2cnc(OC)nc2OC)cn1)Oc1ccccc1		CHEMBL4870895	FC(F)(F)c1cc(/N=N/c2nc(NCCOc3ccccc3)nc3[nH]cnc23)cc(C(F)(F)F)c1		CHEMBL1980535	CC(=O)O[C@H]1CC(C)(C)C(=C=C/C(C)=C/C=C/C=C/C=C(C)/C=C2/C=C(/C=C/[C@@]34O[C@]3(C)C[C@@H](O)CC4(C)C)C(=O)O2)[C@](C)(O)C1
CHEMBL4213752	O=c1ccn([C@@H]2O[C@H](CO)[C@@H](O)C2(Br)Br)c(=O)[nH]1		CHEMBL4850491	FC(F)(F)c1ccc(/N=N/c2nc(NCCOc3ccccc3)nc3[nH]cnc23)cc1		CHEMBL4522006	O=C(Nc1nc2cc(O)c(O)cc2s1)c1ccccc1Sc1ccc(C(F)(F)F)cc1
CHEMBL4209992	Nc1ccn([C@@H]2O[C@H](CO)[C@@H](O)C2(Br)Br)c(=O)n1		CHEMBL4105534	CSc1cccc(N2C(=O)CN(c3cccc(C#N)c3)CC2C(=O)NC2CCCC2)c1		CHEMBL3040216	CC1=CCC(C(=O)/N=C2\CC=C(S(=O)(=O)O)c3cc(S(=O)(=O)O)cc(S(=O)(=O)O)c32)=C/C1=N/C(=O)C1=CC=C/C(=N\C(=O)/N=C2\C=CC=C(C(=O)/N=C3/CC(C(=O)/N=C4\CC=C(S(=O)(=O)O)c5cc(S(=O)(=O)O)cc(S(=O)(=O)O)c54)=CC=C3C)C2)C1
CHEMBL3604366	Nc1nc(F)cc2c1ncn2[C@@H]1C[C@H](CCO)[C@@H](O)[C@H]1O		CHEMBL4087652	CSc1cccc(N2C(=O)CN(c3cncc(C(F)(F)F)c3)CC2C(=O)NC2CCCC2)c1		CHEMBL4452785	O=C(O)c1cc(=O)c2ccc(S[C@@H](/C=C/C=C\CCOc3ccc(Cl)c(Cl)c3)[C@H](O)c3cccc(C(F)(F)F)c3)cc2o1
CHEMBL400092	O[C@H]1C=C2CCN3Cc4cc5c(cc4[C@H]([C@@H]1O)[C@@H]23)OCO5		CHEMBL4090085	CC(=O)c1cccc(N2C(=O)CN(c3cccc(C(F)(F)F)c3)CC2C(=O)NC2CCCC2)c1		CHEMBL4586370	CCCN1C(=O)[C@]2(CC(=O)Nc3c2nnn3[C@@H](C)c2ccc(Cl)cc2)c2cc(Cl)ccc21
CHEMBL3578040	COc1ccc2cc(-c3cn([C@H]4C[C@H](n5cc(C)c(=O)[nH]c5=O)O[C@@H]4CO[Si](C)(C)C(C)(C)C)nn3)ccc2c1		CHEMBL4096967	N#Cc1cccc(NC(=O)C2CN(c3ccccc3)CC(=O)N2c2ccc3ccsc3c2)c1		CHEMBL4531468	C[C@@H](c1ccc(Cl)cc1)n1nnc2c1NC(=O)C[C@]21C(=O)N(CCCCCCCCBr)c2ccc(Cl)cc21
CHEMBL1835505	Cc1cccc(C(=O)c2cc(Cl)ccc2OCCn2ccc(=O)[nH]c2=O)c1		CHEMBL280978	C=C(CC[C@]12O[C@H](C(=O)O)[C@@](O)(C(=O)O)[C@](C(=O)O)(O1)[C@H](OC(=O)/C=C/[C@@H](C)C[C@@H](C)CC)[C@H]2O)[C@@H](OC(C)=O)[C@H](C)Cc1ccccc1		CHEMBL4645097	N#Cc1cn(Cc2ccc(Cl)cc2)c2c1C1(CC(=O)N2)C(=O)Nc2ccc(Cl)cc21
CHEMBL1835511	O=C(c1cc(Br)cc(Br)c1)c1cc(Cl)ccc1OCCn1ccc(=O)[nH]c1=O		CHEMBL2354929	CCN(CC)CCO[C@H]1CC[C@@]2(C)C(=CC[C@H]3[C@@H]4CCC(=O)[C@@]4(C)CC[C@@H]32)C1.Cl		CHEMBL4099397	N=C(N)NCCC[C@@H]1NC(=O)[C@H](CCCNC(=N)N)NC(=O)[C@@H](CCCNC(=N)N)NC(=O)[C@@H](CCCNC(=N)N)NC(=O)[C@H](CO)NC(=O)[C@H](Cc2ccc(-c3ccccc3)cc2)NC(=O)[C@H](CO)NC(=O)[C@H](CCCCN)NC1=O
CHEMBL186141	C=C1CC[C@H]2[C@@](C)(CC[C@@H](O)[C@@]2(C)CO)[C@@H]1C/C=C1/C(=O)OC[C@H]1O		CHEMBL3426591	COc1ccc2c(c1)C1(CC(=O)Nc3c1cnn3Cc1ccc(Cl)cc1)C(=O)N2		CHEMBL4073423	Cc1ccc(Nc2nc(Nc3ccc(F)cc3)nc3ccccc23)c(-c2cc(C)n[nH]2)c1
CHEMBL3578058	Cc1cn([C@H]2C[C@H](NC(=O)c3ccc4ccccc4c3)[C@@H](CO)O2)c(=O)[nH]c1=O		CHEMBL3426585	CN1C(=O)CC2(C(=O)Nc3ccc(Cl)cc32)c2cnn(Cc3ccc(Cl)cc3)c21		CHEMBL3809892	COc1cc(C)c(C(=O)O)cc1-c1ccc(C#CCO)s1
CHEMBL3085959	Cc1cn([C@H]2C[C@H](n3cc(-c4ccc5[nH]ccc5c4)nn3)[C@@H](CO)O2)c(=O)[nH]c1=O		CHEMBL4870281	NC(=O)c1cccc(NC(=O)[C@@H](NC(=O)c2ccc(N3CCOCC3)cc2)c2ccc(OCc3ccccc3)cc2)c1		CHEMBL50	O=c1c(O)c(-c2ccc(O)c(O)c2)oc2cc(O)cc(O)c12
CHEMBL4435591	CC1(C)CC(Nc2nccc(Nc3ccc(-c4cccc(Cl)c4)cc3)n2)CC(C)(C)N1		CHEMBL2064286	O=C1[C@@H](OCc2ccccc2)[C@@H](c2ccc(Cl)cc2Cl)N1CCCn1cnc2c(NCc3ccccc3)ncnc21		CHEMBL140	COc1cc(/C=C/C(=O)CC(=O)/C=C/c2ccc(O)c(OC)c2)ccc1O
CHEMBL4513957	C=C[C@]1(C)C[C@]2(O)[C@H](OC(C)=O)[C@@]3(O)OCC4([C@@H]3[C@@](C)(COC(=O)c3ccccc3)CC[C@H]4O)[C@H]2CC1=O		CHEMBL4465077	COCCCN1C(=O)[C@]2(CC(=O)Nc3c2nnn3[C@@H](C)c2ccc(Cl)cc2)c2cc(Cl)ccc21		CHEMBL4569699	COc1ccc(S(=O)(=O)N(CCCC(C)=O)c2ccccc2)cc1
CHEMBL508326	CC(C)C[C@@H]1NC(=O)[C@@H]2CCCN2C1=O		CHEMBL4470346	C[C@@H](c1ccc(Cl)cc1)n1nnc2c1NC(=O)C[C@]21C(=O)N(CCCN2CCCCC2)c2ccc(Cl)cc21		CHEMBL3765813	Clc1cccc(-c2nnc(/C=C/c3ccc(-c4ccccc4)s3)o2)c1
CHEMBL251077	CC(=O)O[C@@H]1[C@@H](O)C=C2CCN3Cc4cc5c(cc4[C@H]1[C@@H]23)OCO5		CHEMBL4543054	Cn1ccc2c3c(Cl)ncnc3n([C@@H]3O[C@H](CO)[C@@H](O)[C@H]3O)c21		CHEMBL3401566	C(=N/Nc1nc(-c2ccc(-c3ccccc3)cc2)cs1)\c1ccccc1
CHEMBL2163427	CCC(O)(CC)CCCCCCN1C[C@H](O)[C@@H](O)[C@H](O)[C@H]1CO		CHEMBL4556038	Cn1ccc2c3c(-c4ccoc4)ncnc3n([C@@H]3O[C@H](CO)[C@@H](O)[C@H]3O)c21		CHEMBL2403285	O=c1ccn([C@@H]2O[C@H](CO)[C@@H](O)[C@H]2OC(c2ccccc2)(c2ccccc2)c2ccccc2)c(=O)[nH]1
CHEMBL4205956	Nc1nc2c(ncn2[C@@H]2O[C@H](CO)[C@@H](O)C2(Br)Br)c(=O)[nH]1		CHEMBL4454930	Cc1ncnc2c1c1ccn(C)c1n2[C@@H]1O[C@H](CO)[C@@H](O)[C@H]1O		CHEMBL2403282	O=c1ccn([C@@H]2O[C@H](COC(c3ccccc3)(c3ccccc3)c3ccccc3)[C@@H](O)[C@H]2O)c(=O)[nH]1
CHEMBL4574233	C=C[C@]1(C)C[C@]2(O)[C@H](OC(C)=O)C(=O)[C@H]3C(C)(C)CC[C@H](O)[C@]3(COC(C)=O)[C@H]2C[C@@H]1OC(C)=O		CHEMBL4470751	COc1ccc(/C=C\c2cc(OC)c(OC)c(OC)c2)cc1NC(=O)CNC(=O)[C@H](CCCNC(=N)N)NC(=O)[C@H](CCCCN)NC(=O)c1ccccc1		CHEMBL4218425	COc1cccc(NC(C(=O)c2c[nH]c3ccccc23)c2cncnc2)c1
CHEMBL4537884	C=C/C(C)=C/C[C@H]1C(C)=CC[C@H]2[C@](C)(C(=O)O)CCC[C@]12C		CHEMBL4520099	c1ccc(-c2ccc(Nc3ccnc(NCCN4CCCCC4)n3)cc2)cc1		CHEMBL4204690	COc1cccc(NC(C(=O)c2c[nH]c3cc(Cl)ccc23)c2ccccc2)c1
CHEMBL4450646	Oc1cccc(Nc2nc(NCCOc3ccccc3)nc3[nH]cnc23)c1		CHEMBL4636495	C=C(C#Cc1cc(O)ccc1O)CCC(=O)O		CHEMBL4583831	COc1ccc(S(=O)(=O)N(CCCC(=O)C2CCC2)c2ccccc2)cc1
CHEMBL4204382	CC(C)OC(=O)[C@H](C)N[P@](=O)(OC[C@H]1O[C@@H](n2cnc3c(=O)[nH]c(N)nc32)C(Br)(Br)[C@@H]1O)Oc1ccccc1		CHEMBL4643085	C=C(C#Cc1cc(O)ccc1O)CC/C=C(\C)CCC=C(C)C		CHEMBL1173475	O.O=c1c(O)c(-c2ccc(O)c(O)c2)oc2cc(O)cc(O)c12
CHEMBL3085968	Cc1cn([C@H]2C[C@H](n3nncc3COc3ccccc3)[C@@H](CO)O2)c(=O)[nH]c1=O		CHEMBL4635695	C=C(C#Cc1cc(C(=O)O)ccc1O)CC/C=C(\C)CC[C@H](O)C(C)(C)O		CHEMBL3401565	C/C(=N\Nc1nc(-c2ccc(-c3ccccc3)cc2)cs1)c1ccc([N+](=O)[O-])cc1
CHEMBL3578035	Cc1cn([C@H]2C[C@H](n3nncc3-c3ccc(-c4ccccc4)cc3)[C@@H](CO[Si](C)(C)C(C)(C)C)O2)c(=O)[nH]c1=O		CHEMBL4641268	C=C(C#Cc1cc(O[C@@H]2O[C@@H](C)[C@H](O)[C@@H](O)[C@H]2O)ccc1O)CCC=C(C)C		CHEMBL167033	COc1ccc2c(Nc3ccc(Cl)cc3Cl)c(C#N)cnc2c1
CHEMBL3578029	CCOCOC[C@H]1O[C@@H](n2cc(C)c(=O)[nH]c2=O)C[C@@H]1n1nncc1-c1ccc2cc(OC)ccc2c1		CHEMBL4089240	N=C(N)NCCC[C@@H]1NC(=O)[C@H](CCCNC(=N)N)NC(=O)[C@@H](CCCNC(=N)N)NC(=O)[C@@H](Cc2ccccc2)NC(=O)[C@H](CO)NC(=O)[C@H](Cc2ccc(-c3ccccc3)cc2)NC(=O)[C@H](CO)NC(=O)[C@H](CCCCN)NC1=O		CHEMBL4217891	COc1cccc(NC(C(=O)c2c[nH]c3ccccc23)c2ccc(S(C)(=O)=O)cc2)c1
CHEMBL4441526	Oc1cccc(Nc2nc(N3CCOCC3)nc3[nH]cnc23)c1		CHEMBL4069752	N=C(N)NCCC[C@@H]1NC(=O)[C@H](CCCCN)NC(=O)[C@H]2CCCN2C(=O)[C@@H](Cc2ccccc2)NC(=O)[C@H](CO)NC(=O)[C@H](Cc2ccc3ccccc3c2)NC(=O)[C@H](CO)NC(=O)[C@H](CCCCN)NC1=O		CHEMBL4211494	COc1cccc(NC(C(=O)c2c[nH]c3cccc(F)c23)c2ccccc2)c1
CHEMBL3753746	Nc1ncc(Br)c2c1ncn2C1=C[C@H](CO)[C@@H](O)[C@H]1O		CHEMBL4062065	Cc1ccc(Nc2nc(Cl)nc3ccccc23)c(Br)c1		CHEMBL4633761	CCOCc1cn(-c2cccc(S(=O)(=O)Nc3cccc(C(=O)OCC)c3)c2)nn1
CHEMBL3339393	Cc1ccc(NC(=O)c2nc[nH]c2C(=O)NCc2ccccc2)c(-c2ccco2)c1		CHEMBL2042316	Nc1nc(N)c2cccc(Oc3ccccc3)c2n1		CHEMBL4170621	NS(=O)(=O)c1ccc(-n2nc(-c3ccc(F)cc3)cc2-c2ccc3cc(F)ccc3n2)cc1
CHEMBL4164410	Cc1cn(-c2ccc(NC(=O)Nc3ccccc3C)cc2)nn1		CHEMBL4529052	COc1ccc(-c2cnc3[nH]nc(NC(=O)c4cccnc4)c3c2)cc1OC		CHEMBL2440352	CCCC[C@H](NC(=O)[C@H](CCCCN)NC(=O)[C@H](CCCNC(=N)N)NC(=O)c1ccc(/C=C2\SC(=O)N(CCCC)C2=O)cc1)C(N)=O
CHEMBL4796361	COc1nc(N)ncc1-c1cnn(COCCO)c1		CHEMBL4082984	CSc1cccc(N(CC(=O)NC2CCCC2)C(=O)c2cc3ccc(C(F)(F)F)cc3n2C)c1		CHEMBL4165204	Fc1ccc2nc(-c3cc(-c4ccccc4)nn3-c3ccccc3)ccc2c1
CHEMBL3740621	CC(C)C[C@@H]1NC(=O)[C@@H]2C[C@@H](O)CN2C1=O		CHEMBL4098486	CSc1cccc(N2C(=O)CN(c3ccccc3)CC2C(=O)NC2CCCC2)c1		CHEMBL2403296	O=c1[nH]cnc2c1ncn2[C@@H]1O[C@H](COC(c2ccccc2)(c2ccccc2)c2ccccc2)[C@@H](OC(c2ccccc2)(c2ccccc2)c2ccccc2)[C@H]1O
CHEMBL4797883	COc1nc(N)ncc1-c1cnn(COCCOC(C)=O)c1		CHEMBL4067060	O=C(NCC1CC1)C1CN(c2ccccc2)CC(=O)N1c1ccc2ccsc2c1		CHEMBL4447791	C/C(=N\NC(N)=S)[C@H](Cc1c[nH]c2ccccc12)NC(=O)c1ccccc1
CHEMBL4779852	CCC(CC)COC(=O)[C@H](C)NP(=O)(OCCOCn1cc(-c2cnc(N)nc2OC)cn1)Oc1ccccc1		CHEMBL76	CCN(CC)CCCC(C)Nc1ccnc2cc(Cl)ccc12		CHEMBL4556165	Cn1ccc2c1c1c(N)ncnc1n2[C@@H]1O[C@H](CO)[C@@H](O)[C@H]1O
CHEMBL170	C=C[C@H]1CN2CC[C@H]1C[C@H]2[C@H](O)c1ccnc2ccc(OC)cc12		CHEMBL4589727	OC[C@H]1O[C@@H](n2c3ccoc3c3c(-c4ccoc4)ncnc32)[C@H](O)[C@@H]1O		CHEMBL4636168	O=C1CC2(C(=O)Nc3ccc(Cl)cc32)c2cn(Cc3ccc(Cl)cc3)nc2N1
CHEMBL4172550	COc1cc(-c2cnc3c(N4C[C@H](C)O[C@H](C)C4)snc3c2)ccc1N		CHEMBL4590585	O=C(Nc1c[nH]c2ncc(-c3ccccc3)cc12)c1cccnc1		CHEMBL4161254	NS(=O)(=O)c1ccc(N2N=C(c3ccc(OCc4ccccc4)cc3)CC2c2cccc(Cl)c2)cc1
CHEMBL4744269	COc1ncc(-c2cnn(COCCOC(C)=O)c2)c(OC)n1		CHEMBL4528226	Nc1ncc(Br)c2c1ncn2C1=CC[C@H](O)[C@@H]1O		CHEMBL3092579	CSCC[C@H](N)C(=O)N1CCC[C@H]1C(=O)Nc1ccc([N+](=O)[O-])cc1
CHEMBL2146844	OC[C@H]1O[C@@H](n2c3ccc(Cl)cc3c3c(-c4ccco4)ncnc32)[C@H](O)[C@@H]1O		CHEMBL4637885	CCOCc1cn(-c2ccc(NC(=O)Nc3cccc(F)c3)cc2)nn1		CHEMBL4790641	COc1cc(Nc2ncnc3ccc(I)cc23)cc(OC)c1OC
CHEMBL3763557	COc1ccc(C(c2c(O)c3ccccc3oc2=O)c2c(O)c3ccccc3oc2=O)cc1COc1ccc(NC(C)=O)cc1		CHEMBL2042315	COc1cccc2c(N)nc(N)nc12		CHEMBL4169180	NS(=O)(=O)c1ccc(N2N=C(c3ccc(OCc4ccccc4)cc3)CC2c2ccc(Cl)cc2)cc1
CHEMBL3763814	CC1(C)CC(=O)C2=C(C1)c1c(ccc3ccccc13)NC2c1ccc(-c2ccc(O)c(C(=O)O)c2)o1		CHEMBL402274	CC(C)(C)COc1cccc2nc(N)nc(N)c12		CHEMBL4790164	Cc1ccc(NC(=O)c2ccccc2C(=O)NCc2ccc(-c3ccsc3)cc2)cc1
CHEMBL1269736	Cc1ncnc2c1ncn2[C@@H]1O[C@H](CO)[C@@H](O)[C@H]1O		CHEMBL1515627	Nc1ccc(-n2nc3ccccc3n2)cc1		CHEMBL4877453	CCCCCC(=O)N[C@H](C(=O)NCc1ccc(C(N)=O)cc1)c1ccc(OCc2ccccc2)cc1
CHEMBL1630219	C#C[C@@]1(O)[C@H](O)[C@@H](CO)O[C@H]1n1cc(C(N)=O)c2c(N)ncnc21		CHEMBL3735685	O=C(O)COc1ccc(-n2nc3ccc(Cl)cc3[n+]2[O-])cc1		CHEMBL4633636	CCCCCC(=O)N[C@H](C(=O)NCc1ccc(NC(=N)N)nc1)c1ccc(OCc2ccccc2)cc1.O=C(O)C(F)(F)F
CHEMBL599616	O=C(O)COc1ccc(Br)cc1/C=C1\CC/C(=C\c2cc(Br)ccc2OCC(=O)O)C1=O		CHEMBL3736102	CC(C)(Oc1ccc(-n2nc3ccccc3n2)cc1)C(=O)O		CHEMBL4208464	COc1cccc(NC(C(=O)c2c[nH]c3ccccc23)c2ccc(C#N)cc2)c1
CHEMBL4456709	CCCCCOCc1c(Nc2cccc(O)c2)nc(N2CCOCC2)nc1C(=O)NCc1ccc(C(F)(F)F)cc1		CHEMBL3735292	CC(C)(COc1ccc(-n2nc3ccccc3n2)cc1)C(=O)O		CHEMBL4213495	COc1cccc(NC(C(=O)c2c[nH]c3ccccc23)c2cnccn2)c1
CHEMBL4444150	O=C1c2nc(N3CCOCC3)nc(Nc3cccc(O)c3)c2CN1CCc1ccccc1		CHEMBL3736258	Cc1ccc2nn(-c3ccc(OCCCC(C)(C)C(=O)O)cc3)nc2c1		CHEMBL4205234	COc1cc(NC(C(=O)c2c[nH]c3ccccc23)c2ccccc2)cc(OCCN(C)C)c1
CHEMBL4574516	O=C1c2nc(N3CCOCC3)nc(Nc3cccc(O)c3)c2CN1Cc1ccccc1		CHEMBL418899	C[C@@]1(O)[C@H](O)[C@@H](CO)O[C@H]1n1cnc2c(=O)[nH]c(N)nc21		CHEMBL4632524	CCCCCCC(=O)N[C@H](C(=O)NCc1ccc(NC(=N)N)cc1)c1ccc(OCc2ccccc2)cc1.O=C(O)C(F)(F)F
CHEMBL3629296	CCOC(=O)[C@H](C)NP(=O)(OC[C@@]1(C)O[C@@H](n2ccc3c(-c4ccco4)ncnc32)[C@H](O)[C@@H]1O)Oc1ccccc1		CHEMBL29609	Cc1cc(CCCOc2c(C)cc(-c3noc(C(F)(F)F)n3)cc2C)on1		CHEMBL452222	CC(C)=CCc1c2c(c3c(c1O)c(=O)c1cccc(O)c1n3C)C=CC(C)(C)O2
CHEMBL474068	Cc1ccc(OC[C@H]2O[C@@H](n3cc(Cn4ccc5c(Cl)nc(N)nc54)nn3)C[C@@H]2Oc2ccc(C)cc2)cc1		CHEMBL4438239	CN[C@@H]1[C@@H](O)[C@@H](O[C@@H]2[C@@H](O)[C@H](O[C@H]3C[C@H](C(C)O)[C@@H](O)[C@H](O)[C@H]3N)[C@@H](N)C[C@H]2N)OC[C@]1(C)O.O=S(=O)(O)O.O=S(=O)(O)O		CHEMBL4787994	CC1(C)CC(=O)C2=C(C1)N(c1ccccc1)C(c1ccc(C(C)(C)C)cc1)N(c1ccccc1)C2
CHEMBL3338084	CC(C)c1cc2c(cc1O)[C@@]1(C)CCC[C@@](C)(CN3C(=O)c4ccccc4C3=O)[C@@H]1CC2		CHEMBL4471033	CCCCCOCc1c(Nc2ccc(S(N)(=O)=O)cc2)nc(N2CCOCC2)nc1C(=O)NCc1ccccc1		CHEMBL4797540	CC1(C)CC(=O)C2=C(C1)N(c1ccccc1)C(c1ccc(Br)cc1)N(c1ccc(Cl)cc1)C2
CHEMBL2165936	OC[C@@H]1[C@@H](O)[C@H](O)[C@@H](O)CN1CC/C=C\CCOc1cc(F)ccc1F		CHEMBL3765487	Clc1cccc(-c2nnc(/C=C/c3ccc(Br)s3)o2)c1		CHEMBL4646895	COc1cc(-c2cnc3c(N4C[C@H](C)O[C@H](C)C4)snc3c2)ccc1C(N)=O
CHEMBL4538323	C[C@@H](c1ccc(Cl)cc1)n1nnc2c1NC(=O)C[C@]21C(=O)N(CCN(C)C)c2ccc(Cl)cc21		CHEMBL1197690	CCOc1ccc2nc(C)cc(Nc3ccc(OCc4ccccc4Cl)cc3)c2c1		CHEMBL4641825	COc1cccc(-c2ccc3nsc(N4C[C@H](C)O[C@H](C)C4)c3n2)c1
CHEMBL2440334	CCCC[C@H](NC(=O)[C@H](CCCCN)NC(=O)[C@H](CCCNC(=N)N)NC(=O)[C@H](Cc1ccccc1)N1C(=O)/C(=C/c2ccc(OC)c(OC)c2)SC1=S)C(N)=O		CHEMBL2440356	CCCC[C@H](NC(=O)[C@H](CCCCN)NC(=O)[C@H](CCCNC(=N)N)NC(=O)c1ccc(/C=C2\SC(=O)N(CCO)C2=O)cc1)C(N)=O		CHEMBL4099416	CSc1cccc(N(C(=O)c2cc3ccc(C(F)(F)F)cc3[nH]2)[C@@H](C)C(=O)NC2CCCC2)c1
CHEMBL2440164	CCCC[C@H](NC(=O)[C@H](CCCCN)NC(=O)[C@H](CCCNC(=N)N)NC(=O)c1ccc(/C=C2\SC(=O)N(Cc3ccccc3)C2=O)cc1)C(N)=O		CHEMBL2440166	CCCC[C@H](NC(=O)[C@H](CCCCN)NC(=O)[C@H](CCCNC(=N)N)NC(=O)c1ccc(/C=C2\SC(=S)NC2=O)cc1)C(N)=O		CHEMBL4578920	NS(=O)(=O)c1ccc(Nc2nc(N3CCOCC3)nc3c2CN(Cc2ccccc2)C3=O)cc1
CHEMBL3234969	OC(c1ccccc1)c1nc2ccccc2cc1-c1ccc(F)cc1		CHEMBL4453707	C[C@@H](c1ccc(Cl)cc1)n1nnc2c1NC(=O)C[C@]21C(=O)Nc2ccc(Cl)cc21		CHEMBL4286099	OC[C@H]1O[C@@H](n2c3ccc(Cl)cc3c3c(-c4ccoc4)ncnc32)[C@H](F)[C@@H]1O
CHEMBL3234976	COc1ccc(-c2cc3ccccc3nc2C(O)c2ccc(OC)cc2)cc1		CHEMBL4476758	C[C@@H](c1ccc(Cl)cc1)n1nnc2c1NC(=O)C[C@]21C(=O)N(Cc2ccc(Cl)cc2)c2ccc(Cl)cc21		CHEMBL4282918	CN(C)CCCCOC(=O)Nc1ccc(Cn2nc(-c3ccc(C(F)(F)F)cc3)c3ccccc3c2=O)cc1
CHEMBL2440173	CCCC[C@H](NC(=O)[C@H](CCCCN)NC(=O)[C@H](CCCNC(=N)N)NC(=O)c1ccc(/C=C2\SC(=S)N(C3CCCCC3)C2=O)cc1)C(N)=O		CHEMBL4074725	COc1ccc(-c2csc(NC(=O)c3cc(C(C)(C)C)cc(C(C)(C)C)c3)n2)cc1		CHEMBL4585158	COc1cc(Nc2ccnc3ccc(C#N)cc23)cc(OC)c1OC
CHEMBL2440336	CCCC[C@H](NC(=O)[C@H](CCCCN)NC(=O)[C@H](CCCNC(=N)N)NC(=O)/C=C1\SC(=S)N(Cc2ccc(OC)cc2)C1=O)C(N)=O		CHEMBL4584877	COC(=O)[C@@H](NC(=O)[C@H]1O[C@H](O[C@H]2CC[C@@]3(C)[C@@H](CC[C@]4(C)[C@@H]3C(=O)C=C3[C@@H]5C[C@@](C)(C(=O)N[C@H](C(=O)OC)C(C)C)CC[C@]5(C)CC[C@]34C)C2(C)C)[C@H](O[C@@H]2O[C@H](C(=O)N[C@H](C(=O)OC)C(C)C)[C@@H](O)[C@H](O)[C@H]2O)[C@@H](O)[C@@H]1O)C(C)C		CHEMBL3925728	COc1cc(Nc2ccnc3cc(Cl)ccc23)cc(OC)c1OC
CHEMBL3234985	O=C(c1ccc(OCCN2CCCC2)cc1)c1nc2ccccc2cc1-c1ccc(OCCN2CCCC2)cc1		CHEMBL4435967	CC1(C)[C@@H](O[C@H]2O[C@H](C(=O)N[C@@H](Cc3ccccc3)C(=O)O)[C@@H](O)[C@H](O)[C@H]2O[C@@H]2O[C@H](C(=O)N[C@@H](Cc3ccccc3)C(=O)O)[C@@H](O)[C@H](O)[C@H]2O)CC[C@@]2(C)[C@H]1CC[C@]1(C)[C@@H]2C(=O)C=C2[C@@H]3C[C@@](C)(C(=O)N[C@@H](Cc4ccccc4)C(=O)O)CC[C@]3(C)CC[C@]21C		CHEMBL4795295	COc1ccc2ncc(C#N)c(Nc3cc(OC)c(OC)c(OC)c3)c2c1
CHEMBL3234983	CN(C)CCCOc1ccc(C(=O)c2nc3ccccc3cc2-c2ccc(OCCCN(C)C)cc2)cc1		CHEMBL4293580	Nc1ncnc2c1c1cc(Cl)ccc1n2[C@@H]1O[C@H](CO)[C@@H](O)[C@@H]1O		CHEMBL4518437	COc1cc(Nc2cc(C)nc3ccc(C(F)(F)F)cc23)cc(OC)c1OC
CHEMBL3234979	COc1ccc(-c2cc3ccccc3nc2C(=O)c2cc(OC)c(OC)c(OC)c2)cc1		CHEMBL4228979	Nc1ncnc2c1ncn2[C@@H]1C[C@H]([C@H](O)CO)[C@@H](O)[C@H]1O		CHEMBL4095680	O=C(O[C@H](O)CO)c1ccccc1Nc1ccnc2cc(Cl)ccc12
CHEMBL453392	O=C(O)c1cnc2c(c1O)c(=O)n(Cc1ccccc1)c(=O)n2Cc1ccccc1		CHEMBL4177020	COc1cc(-c2cnc3c(N4CCOC(C)(C)C4)snc3c2)ccc1N		CHEMBL1172957	NS(=O)(=O)c1ccc(Nc2nc(N3CCOCC3)nc3[nH]cnc23)cc1
CHEMBL2165923	OC[C@@H]1[C@@H](O)[C@H](O)[C@@H](O)CN1CCCCCCOc1ccc(OC(F)(F)F)cc1		CHEMBL4167255	COc1cc(-c2cnc3c(N4CCCOCC4)snc3c2)ccc1N		CHEMBL4095423	CSc1cccc(N2C(=O)c3ccc(-c4ccco4)n3CC2(C)C(=O)NC2CCCC2)c1
CHEMBL4540012	COc1ccc(/C=C\c2cc(OC)c(OC)c(OC)c2)cc1NC(=O)[C@H](C)N		CHEMBL4159403	COc1cc(-c2cnc3c(N4CCC(C#N)CC4)snc3c2)ccc1N		CHEMBL4090773	CSc1cccc(N2C(=O)CN(c3cccc(C(F)(F)F)c3)CC2C(=O)NC2CCCC2)c1
CHEMBL4524827	COc1ccc(/C=C\c2cc(OC)c(OC)c(OC)c2)cc1NC(=O)CCNC(=O)[C@H](CCCNC(=N)N)NC(=O)[C@H](CCCNC(=N)N)NC(=O)c1ccccc1		CHEMBL4161901	COc1cc(-c2cnc3c(N4CCOC[C@H]4C)snc3c2)ccc1N		CHEMBL4066387	CSc1cccc(N2C(=O)c3cc4ccc(C(F)(F)F)cc4n3C[C@]2(C)C(=O)NC2CCCC2)c1
CHEMBL4444120	COc1ccc(/C=C\c2cc(OC)c(OC)c(OC)c2)cc1NC(=O)[C@H](CO)NC(=O)[C@H](CCCNC(=N)N)NC(=O)[C@H](CCCCN)NC(=O)c1ccccc1		CHEMBL1269814	Cc1nccc2c1ncn2[C@@H]1O[C@H](CO)[C@@H](O)[C@H]1O		CHEMBL4068748	COc1cccc(N2CC(=O)N(c3cccc(SC)c3)C(C(=O)NC3CCCC3)C2)c1
CHEMBL4555655	COc1ccc(/C=C\c2cc(OC)c(OC)c(OC)c2)cc1NC(=O)[C@H](C)NC(=O)[C@H](CCCNC(=N)N)NC(=O)[C@H](CCCCN)NC(=O)c1ccccc1		CHEMBL4285524	CN(C)CCCCNC(=O)Nc1ccc(CN2N=C(c3ccc(F)cc3)C3C=CC=CC3C2=O)cc1		CHEMBL4097800	CC(F)(F)c1cccc(N2C(=O)CN(c3cccc(C(F)(F)F)c3)CC2C(=O)NC2CCCC2)c1
CHEMBL3234968	COc1ccc(-c2cc3cc(F)ccc3nc2C(O)c2ccccc2)cc1		CHEMBL4292693	Nc1ccc(CN2N=C(c3ccc(F)cc3)C3C=CC=CC3C2=O)cc1		CHEMBL4104702	O=C(NC1CCCC1)C1CN(c2ccc(C(F)(F)F)cc2)CC(=O)N1c1ccc2ccoc2c1
CHEMBL2164631	O=C(O)c1cccc(N/N=C/c2cc(C(=O)NCCCCc3ccccc3)c3ccccc3n2)c1		CHEMBL4449580	Clc1ccc(Nc2ccnc(NCCN3CCOCC3)n2)cc1		CHEMBL4089268	O=C(NC1CCCC1)C1CN(c2ccccc2)CC(=O)N1c1ccc2ccsc2c1
CHEMBL3629295	CCOC(=O)[C@H](C)NP(=O)(OC[C@@]1(C)O[C@@H](n2cc(-c3ccccc3)c3c(N)ncnc32)[C@H](O)[C@@H]1O)Oc1ccccc1		CHEMBL4562654	c1ccc(-c2ccc(Nc3ccnc(NCCN4CCOCC4)n3)cc2)cc1		CHEMBL4212350	COc1ccc(OC)c(NC(C(=O)c2c[nH]c3ccccc23)c2ccccc2)c1
CHEMBL3629298	CCOC(=O)[C@H](C)NP(=O)(OC[C@@]1(C)O[C@@H](n2ccc3c(-c4ccccc4)ncnc32)[C@H](O)[C@@H]1O)Oc1ccccc1		CHEMBL4467186	Cc1ncnc2c1c1c(ccn1C)n2[C@@H]1O[C@H](CO)[C@@H](O)[C@H]1O		CHEMBL4791735	CC1(C)CC(=O)C2=C(C1)N(c1ccccc1)C(c1ccc(C(F)(F)F)cc1)N(c1ccccc1)C2
CHEMBL3765453	COc1ccc(-c2nnc(/C=C/c3ccc(Br)s3)o2)cc1		CHEMBL2064289	O=C1[C@@H](Oc2ccccc2)[C@@H](c2ccccc2)N1CCCn1cnc2c(OCc3ccccc3)ncnc21		CHEMBL4800370	CC1(C)CC(=O)C2=C(C1)N(c1ccccc1)C(c1ccc(OC(C)(C)C)cc1)N(c1ccccc1)C2
CHEMBL3763966	Clc1ccc(-c2noc(/C=C/c3ccc(Br)s3)n2)cc1		CHEMBL2064294	CCCN[C@H](c1ccccc1)[C@H](CO)CCCn1cnc2c(NCc3ccccc3)ncnc21		CHEMBL4785326	CC1(C)CC(=O)C2=C(C1)N(c1ccccc1)C(c1cccc(C(F)(F)F)c1)N(c1ccccc1)C2
CHEMBL2165947	Cc1cccc(OCCCCCCN2C[C@H](O)[C@@H](O)[C@H](O)[C@H]2CO)c1		CHEMBL3740043	N=C(N)NCCC[C@H](NC(=O)c1cc2ccccc2s1)C(=O)N[C@@H](CCCCN)C(=O)N[C@@H](C(N)=O)c1ccc(OCc2ccccc2)cc1		CHEMBL4845724	Fc1cccc(Nc2nc(NCCOc3ccccc3)nc3[nH]cnc23)c1
CHEMBL2163430	CCCC(CCC)OCCCCCCN1C[C@H](O)[C@@H](O)[C@H](O)[C@H]1CO		CHEMBL2064293	CC(C)N1C(=O)[C@H](CCn2cnc3c(OCc4ccccc4)ncnc32)[C@H]1c1ccccc1		CHEMBL4794463	CCCCC1N(c2ccccc2)CC2=C(CC(C)(C)CC2=O)N1c1ccccc1
CHEMBL1630220	C#C[C@@]1(O)[C@H](OC(=O)C(C)C)[C@@H](COC(=O)C(C)C)O[C@H]1n1cc(C(N)=O)c2c(N)ncnc21		CHEMBL3735299	Oc1ccc(-n2nc3ccccc3n2)cc1		CHEMBL4787059	CC1(C)CC(=O)C2=C(C1)N(c1ccccc1)C(c1ccc(Br)cc1)N(c1ccc3ccccc3c1)C2
CHEMBL1269812	Cc1ncnc2c1ccn2[C@@H]1O[C@H](CO)[C@@H](O)[C@H]1O		CHEMBL3734808	CC(C)(CCCOc1ccc(-n2nc3ccccc3n2)cc1)C(=O)O		CHEMBL4791533	CC1(C)CC(=O)C2=C(C1)N(c1ccc(Oc3ccccc3)cc1)C(c1ccc(Br)cc1)N(c1ccc(Cl)cc1)C2
CHEMBL3581163	CC(C)CCNc1nc(Nc2cccc(O)c2)c2nc[nH]c2n1		CHEMBL2440349	CCCC[C@H](NC(=O)[C@H](CCCN)NC(=O)[C@H](CCCNC(=N)N)NC(=O)c1ccc(/C=C2\SC(=O)N(Cc3ccccc3)C2=O)cc1)C(N)=O		CHEMBL4638299	N=C(N)Nc1ccc(CNC(=O)[C@@H](NC(=O)c2ccc(-c3ccc(Cl)cc3)cc2)c2ccc(OCc3ccccc3)cc2)cc1.O=C(O)C(F)(F)F
CHEMBL3581164	CNc1nc(Nc2cccc(O)c2)c2nc[nH]c2n1		CHEMBL2440177	CCCC[C@H](NC(=O)[C@H](CCCCN)NC(=O)[C@H](CCCNC(=N)N)NC(=O)c1ccc(/C=C2\SC(=S)N(CCO)C2=O)cc1)C(N)=O		CHEMBL4217780	COc1cc(NC(C(=O)c2c[nH]c3ccc(CCCO)cc23)c2ccccc2)cc(OC)c1
CHEMBL866	COc1c(C)c2c(c(O)c1C/C=C(\C)CCC(=O)O)C(=O)OC2		CHEMBL1631698	C#C[C@@]1(O)[C@H](O)[C@@H](CO)O[C@H]1n1cnc2c(N)ncnc21		CHEMBL4127066	CC#C[C@@]1(O)[C@H](O)[C@@H](CO[P@@](=O)(N[C@@H](C)C(=O)OC(C)C)Oc2ccccc2)O[C@H]1n1ccc(=O)[nH]c1=O
CHEMBL4218561	COc1cccc(NC(C(=O)c2c[nH]c3ccccc23)c2ccccc2)n1		CHEMBL4435541	N=C(N)NCCC[C@H](NC(=O)c1ccccc1)C(=O)N[C@@H](CCCCN)C(=O)N[C@@H](C(=O)N[C@H]1CN(c2ccccc2)C1=O)c1ccc(OCc2ccccc2)cc1		CHEMBL4159714	NS(=O)(=O)c1ccc(N2N=C(c3ccc(Oc4ccccc4)cc3)CC2c2ccc(F)cc2)cc1
CHEMBL2146846	OC[C@H]1O[C@@H](n2c3ccc(Cl)cc3c3c(-c4cccs4)ncnc32)[C@H](O)[C@@H]1O		CHEMBL516312	N#Cc1ccc(-c2cnc3[nH]cc(NC(=O)c4cccnc4)c3c2)cc1		CHEMBL4214143	COc1cncc(NC(C(=O)c2c[nH]c3ccccc23)c2ccccc2)n1
CHEMBL2146850	OC[C@H]1O[C@@H](n2c3ccccc3c3c(-c4ccco4)ncnc32)[C@H](O)[C@@H]1O		CHEMBL535	CCN(CC)CCNC(=O)c1c(C)[nH]c(/C=C2\C(=O)Nc3ccc(F)cc32)c1C		CHEMBL4203657	O=C(c1c[nH]c2ccccc12)C(NC1CCCC1)c1ccccc1
CHEMBL1277662	CC(C)c1cc2c(cc1O)[C@@]1(C)CCC[C@@](C)(C=O)[C@@H]1CC2		CHEMBL4524476	COc1ccc(-c2cnc3[nH]cc(NC(=O)c4ccc(F)cc4)c3c2)cc1OC		CHEMBL4454780	CCN(CC)c1ccc(Oc2ccc(-c3[nH]c4cccc(F)c4c(=O)c3C)cc2F)cc1
CHEMBL524331	OC[C@H]1O[C@@H](n2cc(Cn3cnc4c3ncn3ccnc43)nn2)C[C@@H]1O		CHEMBL4474078	COc1ccc(-c2cnc3[nH]cc(C(=O)c4ccccc4)c3c2)cc1OC		CHEMBL4799807	COc1cc(Nc2ncnc3ccc(C)cc23)cc(OC)c1OC
CHEMBL518883	CC(=O)O[C@@H]1[C@H](C)CC2[C@@H]3C4OC(CC(=O)CCC[C@]4(C)OC[C@@H]2C)[C@@H]31		CHEMBL4461527	COc1ccc(-c2cnc3[nH]cc(C#Cc4ccccc4)c3c2)cc1OC		CHEMBL4800494	COc1cc(Nc2ncnc3cc(Br)ccc23)cc(OC)c1OC
CHEMBL514085	Nc1nc(Cl)c2ccn(Cc3cn([C@H]4C[C@H](O)[C@@H](CO)O4)nn3)c2n1		CHEMBL4159994	COc1cc(-c2cnc3c(N4CCOC(C)C4)snc3c2)ccc1N		CHEMBL4517424	COc1cc(Nc2ccnc3ccc(I)cc23)cc(OC)c1OC
CHEMBL477802	C#CCn1cnc2c(Cl)nc(N)nc21		CHEMBL4162766	COc1cc(-c2cnc3c(N4CCC(N)CC4)snc3c2)ccc1N		CHEMBL4586530	COc1ccc2c(Nc3cc(OC)c(OC)c(OC)c3)ccnc2c1
CHEMBL518445	Cc1ccc(OC[C@H]2O[C@@H](n3cc(Cn4ccc(=O)[nH]c4=O)nn3)C[C@@H]2Oc2ccc(C)cc2)cc1		CHEMBL2164630	O=C(O)c1cccc(N/N=C/c2cc(C(=O)NCCCc3ccccc3)c3ccccc3n2)c1		CHEMBL4784422	COc1cc2nc(C)cc(Nc3cc(OC)c(OC)c(OC)c3)c2cc1OC
CHEMBL449525	C#CCn1ccc(=O)[nH]c1=O		CHEMBL2164641	O=C(N/N=C\Cc1ccccc1)c1cc(/C=N/Nc2cccc(C(F)(F)F)c2)nc2ccccc12		CHEMBL4754667	COc1cc(Nc2cc(C)nc3ccc(F)cc23)cc(OC)c1OC
CHEMBL1630221	C#C[C@@]1(O)[C@H](O)[C@@H](CO)O[C@H]1n1ccc2c(N)ncnc21		CHEMBL4085500	Cc1ccc(Nc2nc(Cl)nc3[nH]cnc23)c(Br)c1		CHEMBL4639442	COC(=O)c1ccc(Cn2ncc3c2NC(=O)CC32C(=O)Nc3ccc(Cl)cc32)cc1
CHEMBL3765469	Clc1ccc(-c2nnc(/C=C/c3ccc(Br)s3)o2)cc1Cl		CHEMBL3357580	CC[C@H](C)C(=O)O[C@@H]1[C@@H]2C(=O)[C@](C)(C3CC[C@@]4(C)[C@H](c5ccoc5)OC(=O)C[C@H]4[C@]34O[C@H]24)[C@@H]([C@@H](O)C(=O)OC)C1(C)C		CHEMBL4285617	Nc1cccc2c1ncn2[C@@H]1C(F)=C(CO)[C@@H](O)[C@H]1O
CHEMBL3764522	FC(F)(F)c1ccc(-c2nnc(/C=C/c3ccc(-c4ccccc4)s3)o2)cc1		CHEMBL1797882	COc1ccc(/C=C/C(=O)C(=O)NC(C)(C)C)cc1OC		CHEMBL4166209	COc1cc(-c2cnc3c(N4CCCCC4)snc3c2)ccc1N
CHEMBL3764653	Clc1ccc(-c2nnc(/C=C/c3ccc(Br)s3)o2)cc1		CHEMBL4570993	COc1ccc([C@@H]2CC(=O)c3c(O)cc(O[C@@H]4O[C@H](CO[C@@H]5OC[C@](O)(CO)[C@H]5O)[C@@H](O)[C@H](O)[C@H]4O)cc3O2)cc1		CHEMBL4454595	COC(=O)CN1C(=O)C[C@]2(C(=O)Nc3ccc(Cl)cc32)c2nnn([C@@H](C)c3ccc(Cl)cc3)c21
CHEMBL3741422	N=C(N)NCCC[C@H](NC(=O)c1ccccc1)C(=O)N[C@@H](CCCCN)C(=O)N[C@@H](C(N)=O)c1ccc(OCc2ccccc2)cc1		CHEMBL485818	O=C(O)[C@H]1O[C@@H](Oc2cc3oc(-c4ccccc4)cc(=O)c3c(O)c2O)[C@H](O)[C@@H](O)[C@@H]1O		CHEMBL3628514	C[C@]1(CO)O[C@@H](n2cc(-c3ccco3)c3c(N)ncnc32)[C@H](O)[C@@H]1O
CHEMBL3739504	N=C(N)NCCC[C@H](NC(=O)c1ccc(-c2cccs2)s1)C(=O)N[C@@H](CCCCN)C(=O)N[C@@H](C(N)=O)c1ccc(OCc2ccc(Cl)c(Cl)c2)cc1		CHEMBL4456898	CCCCC1C(C(=O)N(C)OC)C(c2ccccc2)CCN1C(=O)OC(C)(C)C		CHEMBL4779229	COc1cc(-c2cnc3c(-c4cccc(NC(=O)C5CCCC5)c4)snc3c2)ccc1N
CHEMBL3234981	CN(C)CCCOc1ccc(-c2cc3ccccc3nc2C(=O)c2ccc(O)cc2)cc1		CHEMBL553	C#Cc1cccc(Nc2ncnc3cc(OCCOC)c(OCCOC)cc23)c1		CHEMBL4291863	CSc1ncnc2c1c1cc(Cl)ccc1n2[C@@H]1O[C@H](CO)[C@@H](O)[C@@H]1O
CHEMBL3808633	COc1cccc(S(=O)(=O)NC(=O)c2cc(-c3ccc(C#CCO)s3)c(OC)cc2OC)c1		CHEMBL1263	OCc1cc(C(O)CNCCCCCCOCCCCc2ccccc2)ccc1O		CHEMBL4278184	OC[C@H]1O[C@@H](n2c3ccc(Cl)cc3c3c(-c4ccco4)ncnc32)[C@H](F)[C@@H]1O
CHEMBL597979	O=S(=O)(O)c1cccc(NNc2ccc(Nc3ccccc3)cc2)c1		CHEMBL3763981	O=C(/C=C/c1ccc(-c2ccccc2)s1)Nc1cccc(Cl)c1		CHEMBL4453410	O=C1c2nc(N3CCOCC3)nc(Nc3cccc(O)c3)c2CN1CCOc1ccccc1
CHEMBL2164662	O=C(N/N=C\Cc1ccccc1)c1cc(/C=N/Nc2cccc(Cl)c2)nc2ccccc12		CHEMBL4532596	Cn1ccc2c1c1c(Cl)ncnc1n2[C@@H]1O[C@H](CO)[C@@H](O)[C@H]1O		CHEMBL4642379	CCOCc1cn(-c2cccc(S(=O)(=O)Nc3cccc(C(=O)O)c3)c2)nn1
CHEMBL101917	COc1cc2ncc(C#N)c(Nc3ccc(Cl)cc3Cl)c2cc1OC		CHEMBL4585910	Cc1ncnc2c1c1occc1n2[C@@H]1O[C@H](CO)[C@@H](O)[C@H]1O		CHEMBL4871109	Fc1cc(F)cc(NNc2nc(NCCOc3ccccc3)nc3[nH]cnc23)c1
CHEMBL3581161	CC(=O)c1ccc(Nc2nc(NCCO)nc3[nH]cnc23)cc1		CHEMBL3736249	Oc1ccc(-n2nc3cc(Cl)c(Cl)cc3n2)cc1		CHEMBL4797498	CC1(C)CC(=O)C2=C(C1)N(c1ccccc1)C(c1ccc(Br)cc1)N(Cc1ccccc1)C2
CHEMBL4217011	O=C(c1c[nH]c2ccccc12)C(Nc1cccc(OC(F)(F)F)c1)c1ccccc1		CHEMBL4483684	Cc1cccc(-c2cnc3[nH]cc(NC(=O)c4cccnc4)c3c2)c1		CHEMBL4800142	CC1(C)CC(=O)C2=C(C1)N(c1ccc3ccccc3c1)C(c1ccc(Br)cc1)N(c1ccc(Cl)cc1)C2
CHEMBL4208209	O=C(c1c[nH]c2ccccc12)C(Nc1ccc2[nH]c(=O)oc2c1)c1ccccc1		CHEMBL4456500	O=C(Nc1c[nH]c2ncc(-c3ccsc3)cc12)c1cccnc1		CHEMBL4227895	Nc1ncnc2c1ncn2[C@@H]1C[C@H]([C@@H](O)CO)[C@@H](O)[C@H]1O
CHEMBL4216943	COc1cccc(NC(C(=O)c2c[nH]c3ccccc23)c2ccco2)c1		CHEMBL4515873	COc1ccc(-c2cnc3[nH]cc(NC(=O)c4ccncc4)c3c2)cc1OC		CHEMBL4633070	NC(=O)C1C(=O)Nc2c(cnn2Cc2ccc(Cl)cc2)C12C(=O)Nc1ccc(Cl)cc12
CHEMBL4203293	COc1cc(NC(C(=O)c2c[nH]c3ccccc23)c2ccccc2)cc(OCCO)c1		CHEMBL4476807	COc1ccc(-c2cnc3[nH]cc(NS(=O)(=O)c4ccccc4)c3c2)cc1OC		CHEMBL4169166	COc1cc(-c2cnc3c(N4CCOC[C@@H]4C)snc3c2)ccc1N
CHEMBL4212403	COc1cc(NC(C(=O)c2c[nH]c3ccccc23)c2ccccc2)cc(OC)c1		CHEMBL3793486	CC(C)CC[C@@H](O)[C@](C)(O)[C@H]1CC[C@@]2(O)C3=CC(=O)[C@@H]4C[C@@H](O)[C@@H](O)C[C@]4(C)[C@H]3[C@H](O)C[C@]12C		CHEMBL4645424	O=C1CC2(C(=O)Nc3ccc(Cl)cc32)c2cnn(Cc3ccc(Cl)cc3F)c2N1
CHEMBL4085513	O=C(CSCC(=O)Nc1ccc(OC(F)(F)F)cc1)NNC(=S)Nc1ccccc1		CHEMBL3793792	CC(=O)OC(C)(C)CC[C@@H](O)[C@](C)(O)[C@H]1CC[C@@]2(O)C3=CC(=O)[C@@H]4C[C@@H](O)[C@@H](O)C[C@]4(C)[C@H]3CC[C@]12C		CHEMBL4642971	CC(=O)C1C(=O)Nc2c(cnn2Cc2ccc(Cl)cc2)C12C(=O)Nc1ccc(Cl)cc12
CHEMBL2440331	CCCC[C@H](NC(=O)[C@H](CCCCN)NC(=O)[C@H](CCCNC(=N)N)NC(=O)c1cccc(/C=C2\SC(=S)NC2=O)c1)C(N)=O		CHEMBL4587560	COc1cc2nc(NC(=O)[C@H]3CCCN3S(=O)(=O)c3ccc(C)cc3)sc2cc1OC		CHEMBL4642472	N#CC1C(=O)Nc2c(cnn2Cc2ccc(Cl)cc2)C12C(=O)Nc1ccc(Cl)cc12
CHEMBL2440154	CCCC[C@H](NC(=O)[C@H](CCCCN)NC(=O)[C@H](CCCNC(=N)N)NC(=O)c1ccc(/C=C2\SC(=S)N(c3ccc(OC)cc3)C2=O)cc1)C(N)=O		CHEMBL4591917	CCCCc1cn(-c2cccc(S(=O)(=O)Nc3cccc4cnccc34)c2)nn1		CHEMBL4288693	CSc1ncnc2c1c1cc(Cl)ccc1n2[C@@H]1O[C@H](CO)[C@@H](O)[C@@H]1F
CHEMBL3234984	O=C(c1ccc(OCCN2CCCCC2)cc1)c1nc2ccccc2cc1-c1ccc(OCCN2CCCCC2)cc1		CHEMBL1535689	O=C1c2c(O)ccc([N+](=O)[O-])c2C(=O)c2c([N+](=O)[O-])ccc(O)c21		CHEMBL4281923	OC[C@H]1O[C@@H](n2c3ccc(Cl)cc3c3c(-c4cccs4)ncnc32)[C@@H](F)[C@@H]1O
CHEMBL3234970	OC(c1ccccc1)c1nc2ccc(F)cc2cc1-c1ccc(F)cc1		CHEMBL4638250	O=C(O)CCNC(=O)c1cc(-c2ccccc2)c(=O)n2c1sc1ccc(OC3CCCCC3)cc12		CHEMBL4285350	OC[C@H]1O[C@@H](n2c3ccc(Cl)cc3c3c(-c4ccccc4)ncnc32)[C@@H](F)[C@@H]1O
CHEMBL2332247	O=C(CNCc1ccc(C(=O)N2CCCCC2)cc1)NC(=O)COc1ccccc1		CHEMBL4644102	O=C(NCc1ccccc1)c1cc(-c2ccccc2)c(=O)n2c1sc1ccc(OC3CCCCC3)cc12		CHEMBL4292913	COc1ncnc2c1c1cc(Cl)ccc1n2[C@@H]1O[C@H](CO)[C@@H](O)[C@H]1F
CHEMBL3234967	COc1ccc(-c2cc3cc(OC)ccc3nc2C(O)c2ccccc2)cc1		CHEMBL4514133	COC(=O)C[C@H](NC(=O)[C@H]1O[C@@H](O[C@H]2[C@@H](O[C@H]3CC[C@@]4(C)[C@@H](CC[C@]5(C)[C@@H]4C(=O)C=C4[C@@H]6C[C@@](C)(C(=O)O)CC[C@]6(C)CC[C@]45C)C3(C)C)O[C@H](C(=O)N[C@@H](CC(=O)OC)C(=O)OC)[C@@H](O)[C@@H]2O)[C@H](O)[C@@H](O)[C@@H]1O)C(=O)O		CHEMBL4533005	CCCCc1cn(-c2cccc(S(=O)(=O)Nc3ccccc3O)c2)nn1
CHEMBL3234980	O=C(c1ccc(O)cc1)c1nc2ccccc2cc1-c1ccc(O)cc1		CHEMBL4074990	CSc1cccc(N2C(=O)c3cc4ccc(C(F)(F)F)cc4n3CC2(C)C(=O)NC2CCCC2)c1		CHEMBL4577525	CCCCc1cn(-c2cccc(S(=O)(=O)Nc3ccccc3OC)c2)nn1
CHEMBL3740745	COc1cccc(COc2ccc([C@@H](NC(=O)[C@H](CCCCN)NC(=O)[C@H](CCCNC(=N)N)NC(=O)c3cccs3)C(N)=O)cc2)c1		CHEMBL4175697	COc1ccc(-c2cc(-c3ccc4cc(F)ccc4n3)n(-c3ccccc3)n2)cc1		CHEMBL4745476	COc1cc(Nc2c(C#N)cnc3ccc(Br)cc23)cc(OC)c1OC
CHEMBL184	Nc1nc(O)c2ncn(COCCO)c2n1		CHEMBL4641816	CCCCCC(=O)N[C@H](C(=O)NCc1ccc(NC(=N)N)cc1)c1ccc(OCc2ccc(C(F)(F)F)cc2)cc1.O=C(O)C(F)(F)F		CHEMBL4756887	O=C(O)C1CCN(C(=O)c2cc(-c3ccccc3)c(=O)n3c2sc2ccc(OC4CCCCC4)cc23)C1
CHEMBL4067945	CSc1cccc(N2C(=O)CN(c3cccnc3)CC2C(=O)NC2CCCC2)c1		CHEMBL1631769	C#C[C@@]1(O)[C@H](O)[C@@H](CO)O[C@H]1n1cc(C#N)c2c(N)ncnc21		CHEMBL4752745	O=C(c1cc(-c2ccccc2)c(=O)n2c1sc1ccc(OC3CCCCC3)cc12)N1CCCC(O)C1
CHEMBL4069006	O=C(NC1CCCC1)C1CN(c2cccc(C(F)(F)F)c2)CC(=O)N1c1cccc(OC(F)(F)F)c1		CHEMBL3735233	COc1ccc2nn(-c3ccc(OCCCC(C)(C)C(=O)O)cc3)nc2c1		CHEMBL4783226	CC1(C)CC(=O)C2=C(C1)N(c1ccccc1)C(c1ccc(OCc3ccccc3)cc1)N(c1ccccc1)C2
CHEMBL4068079	NC(=O)c1cccc(NC(=O)C2CN(c3ccccc3)CC(=O)N2c2ccc3ccsc3c2)c1		CHEMBL4569026	CCOCc1cn(-c2cccc(S(=O)(=O)Nc3ccccc3C(F)(F)F)c2)nn1		CHEMBL4792633	CC1(C)CC(=O)C2=C(C1)N(c1ccc(Cl)cc1)C(c1ccc(Br)cc1)N(c1ccc(Cl)cc1)C2
CHEMBL4096059	CSc1cccc(N2C(=O)CN(c3cc(C(F)(F)F)ccc3C)CC2C(=O)NC2CCCC2)c1		CHEMBL4751025	C[C@H](CO)NC(=O)c1cc(-c2ccccc2)c(=O)n2c1sc1ccc(OC3CCCCC3)cc12		CHEMBL4483405	CCN1C(=O)[C@]2(CC(=O)Nc3c2nnn3[C@@H](C)c2ccc(Cl)cc2)c2cc(Cl)ccc21
CHEMBL4094417	O=C(NC1CCCC1)[C@@H]1CN(c2ccc(C(F)(F)F)cc2)CC(=O)N1c1ccc2ccsc2c1		CHEMBL4784304	O=C(O)C1CCCN(C(=O)c2cc(-c3ccccc3)c(=O)n3c2sc2ccc(OC4CCCCC4)cc23)C1		CHEMBL1277682	CC(C)CC(=O)c1c(O)c2c(c3c(-c4ccccc4)cc(=O)oc13)OC(C)(C)C=C2
CHEMBL4088113	C=CC(=O)N1CCc2ccc(N3C(=O)NCc4cnc5ccc(-c6cnn(C)c6)cc5c43)cc21		CHEMBL3628261	N=C(N)c1ccc(C[C@H](NC(=O)c2ccccc2)C(=O)N[C@@H](CCCCN)C(=O)N[C@H](C(N)=O)c2ccccc2)cc1		CHEMBL728	CN1CCN(CCCN2c3ccccc3Sc3ccc(Cl)cc32)CC1
CHEMBL2064290	OC[C@@H](Oc1ccccc1)[C@H](NCCn1cnc2c(NCc3ccccc3)ncnc21)c1ccc(Cl)cc1		CHEMBL3628278	N=C(N)c1ccc(C[C@H](NC(=O)CCc2ccccc2)C(=O)N[C@@H](CCCCN)C(=O)N[C@H](C(N)=O)c2ccccc2)cc1		CHEMBL4475021	C/C=C(\C)C(=O)O[C@@H]1CC[C@]2(C)[C@H]3CC[C@@]4(C)[C@@H]([C@@H]5C[C@H]([C@@H]6OC6(C)C)O[C@H]5O)CC[C@]4(C)C3=CC[C@H]2C1(C)C
CHEMBL2064299	O=C1[C@@H](Oc2ccccc2)[C@@H](c2ccccc2)N1CCn1cnc2c(NCc3ccccc3)ncnc21		CHEMBL3581154	COc1ccc(Cn2c(C)cc(OCc3ccc(F)cc3F)cc2=O)cc1		CHEMBL4591166	C[C@@H](c1ccc(Cl)cc1)n1nnc2c1NC(=O)C[C@]21C(=O)N(Cc2cc(C(C)(C)C)cc(C(C)(C)C)c2)c2ccc(Cl)cc21
CHEMBL2064301	OC[C@@H](OCc1ccccc1)[C@H](NCCCn1cnc2c(NCc3ccccc3)ncnc21)c1ccc(Cl)cc1Cl		CHEMBL1173660	OCCN1CCN(c2nc(Nc3ccccc3)c3nc[nH]c3n2)CC1		CHEMBL4534709	COCOCCN1C(=O)[C@]2(CC(=O)Nc3c2nnn3[C@@H](C)c2ccc(Cl)cc2)c2cc(Cl)ccc21
CHEMBL2064303	O=C1[C@H](CCn2cnc3c(OCc4ccccc4)ncnc32)[C@@H](c2ccccc2)N1Cc1ccccc1		CHEMBL4798817	CC1(C)CC(=O)C2=C(C1)N(c1ccccc1)C(c1ccc(O)cc1)N(c1ccccc1)C2		CHEMBL4475296	C[C@@H](c1ccc(Cl)cc1)n1nnc2c1NC(=O)C[C@]21C(=O)N(CCN2CCCC2)c2ccc(Cl)cc21
CHEMBL4104678	N=C(N)NCCC[C@@H]1NC(=O)[C@H](CCCCN)NC(=O)[C@H]2CCCN2C(=O)[C@@H](Cc2ccccc2)NC(=O)[C@H](CO)NC(=O)[C@H](CCc2ccccc2)NC(=O)[C@H](CO)NC(=O)[C@H](CCCCN)NC1=O		CHEMBL4794722	CC1(C)CC(=O)C2=C(C1)N(c1ccccc1)C(c1cccs1)N(c1ccccc1)C2		CHEMBL493	CC(C)C[C@H]1C(=O)N2CCC[C@H]2[C@]2(O)O[C@](NC(=O)[C@@H]3C=C4c5cccc6[nH]c(Br)c(c56)C[C@H]4N(C)C3)(C(C)C)C(=O)N12
CHEMBL342269	Nc1nc(N)c2c(F)cccc2n1		CHEMBL4782121	CC(C)c1ccc(C2N(c3ccccc3)CC3=C(CC(C)(C)CC3=O)N2c2ccccc2)cc1		CHEMBL44889	COc1ccc2c3ccnc(C)c3n(C)c2c1
CHEMBL2164648	CCOC(=O)c1cc(/C=N/Nc2nc3ccccc3[nH]2)c(O)c(/C=N/Nc2nc3ccccc3[nH]2)c1		CHEMBL4790873	CC1(C)CC(=O)C2=C(C1)N(c1ccccc1)C(c1cccc([N+](=O)[O-])c1)N(c1ccccc1)C2		CHEMBL4555033	C[C@@H](c1ccc(Cl)cc1)n1nnc2c1NC(=O)C[C@]21C(=O)N(CCC(C)(C)C)c2ccc(Cl)cc21
CHEMBL2146848	OC[C@H]1O[C@@H](n2c3ccc(Cl)cc3c3c(-c4cc5ccccc5o4)ncnc32)[C@H](O)[C@@H]1O		CHEMBL4781082	CC1(C)CC(=O)C2=C(C1)N(c1ccccc1)C(c1ccc(Br)cc1)N(c1ccc(C(F)(F)F)cc1)C2		CHEMBL4440652	C[C@@H](c1ccc(Cl)cc1)n1nnc2c1N(C)C(=O)C(C)(C)[C@]21C(=O)N(C)c2ccc(Cl)cc21
CHEMBL3764867	Cc1ccc2nc(-c3ccc(NC(=O)c4c(O)c5c(n(Cc6ccco6)c4=O)CCCC5)cc3)sc2c1		CHEMBL2403286	O=c1ccn([C@@H]2O[C@H](CO)[C@@H](OC(c3ccccc3)(c3ccccc3)c3ccccc3)[C@H]2O)c(=O)[nH]1		CHEMBL4471004	Cc1ccc(CN2C(=O)[C@]3(CC(=O)Nc4c3nnn4[C@@H](C)c3ccc(Cl)cc3)c3cc(Cl)ccc32)cn1
CHEMBL2164639	O=C(N/N=C\C=C\c1ccccc1)c1cc(/C=N/Nc2cccc([N+](=O)[O-])c2)nc2ccccc12		CHEMBL4647929	Cn1cc(C(=O)N[C@@H](Cc2ccc(O)cc2)C(=O)O)cc(-c2ccccc2)c1=O		CHEMBL4210531	COc1cccc(NC(C(=O)c2c[nH]c3ccccc23)c2cccnc2)c1
CHEMBL3234977	COc1ccc(-c2cc3ccccc3nc2C(O)c2cc(OC)c(OC)c(OC)c2)cc1		CHEMBL3734918	C[C@H](Oc1ccc(-n2nc3ccccc3n2)cc1)C(=O)O		CHEMBL3628274	N=C(N)c1ccc(C[C@H](NC(=O)c2ccc(C(F)(F)F)cc2)C(=O)N[C@@H](CCCCN)C(=O)N[C@H](C(N)=O)c2ccccc2)cc1
CHEMBL2413435	Nc1ncnc2c1c1ccccc1n2[C@@H]1O[C@H](CO)[C@@H](O)[C@H]1O		CHEMBL3734886	COc1ccc2nn(-c3ccc(OCC(C)(C)C(=O)O)cc3)nc2c1		CHEMBL4080284	O=C1[C@@H]2CCCN2[C@@H](c2ccc([N+](=O)[O-])cc2)N1c1ccc([N+](=O)[O-])cc1
CHEMBL2413445	CCCCc1cccc2c1c1c(N)ncnc1n2[C@@H]1O[C@H](CO)[C@@H](O)[C@H]1O		CHEMBL3735768	Clc1ccc(Cn2nc3cc(Cl)c(Cl)cc3n2)cc1		CHEMBL4095347	CSc1cncc(N2C(=O)CN(c3cccc(C(F)(F)F)c3)CC2C(=O)NC2CCCC2)c1
CHEMBL1631768	C#C[C@@]1(O)[C@H](O)[C@@H](CO)O[C@H]1n1cc(F)c2c(N)ncnc21		CHEMBL4646053	N=C(N)Nc1ccc(CNC(=O)[C@@H](NC(=O)c2ccc(OC3CCCCC3)cc2)c2ccc(OCc3ccccc3)cc2)cc1.O=C(O)C(F)(F)F		CHEMBL4244542	O=P([O-])([O-])CO[C@H]1C[C@@H](n2cnc3c(NC4CC4)ncnc32)C=C1I.[Na+].[Na+]
CHEMBL3808396	COc1cc(C)c(C(=O)NS(C)(=O)=O)cc1-c1ccc(C#CCO)s1		CHEMBL3581160	CNc1nc(Nc2ccc(C(C)=O)cc2)c2nc[nH]c2n1		CHEMBL4852712	N/C(=N\O)c1cccc(-c2ccc3c(c2)c2cc(-c4cccc(/C(N)=N/O)c4)ccc2n3S(=O)(=O)c2cccc3cccnc23)c1
CHEMBL3809551	COc1cc(C)c(S(=O)(=O)NC(=O)c2cccc3cccnc23)cc1-c1ccc(C#CCO)s1		CHEMBL4515575	CCCCCOCc1c(Nc2ccc(S(N)(=O)=O)cc2)nc(N2CCOCC2)nc1C(=O)NCc1ccc(OC)cc1		CHEMBL4860908	CN(C)CCCn1c2ccc(-c3cccc(/C(N)=N/O)c3)cc2c2cc(-c3cccc(/C(N)=N/O)c3)ccc21
CHEMBL3764002	Clc1cc(Cl)cc(-c2nnc(/C=C/c3ccc(Br)s3)o2)c1		CHEMBL4467882	COc1ccc(CNC(=O)c2nc(N3CCOCC3)nc(Nc3cccc(O)c3)c2CO)cc1		CHEMBL4873981	Nc1ncc(Br)c2c1ncn2[C@H]1C(F)=C[C@H](O)[C@@H]1O
CHEMBL3765002	FC(F)(F)c1ccc(-c2nnc(/C=C/c3ccc(Br)s3)o2)cc1		CHEMBL2042317	COc1ccc2c(N)nc(N)nc2c1		CHEMBL4793101	Cc1ccc(NC(=O)c2ccccc2C(=O)Nc2ccc(C)cc2-c2ccsc2)cc1
CHEMBL3234971	COc1ccc(-c2cc3ccccc3nc2C(=O)c2ccccc2)cc1		CHEMBL2042319	CCCCCCCCOc1cccc2nc(N)nc(N)c12		CHEMBL4289528	Cc1ncnc2c1c1cc(Cl)ccc1n2[C@@H]1O[C@H](CO)[C@@H](O)[C@H]1F
CHEMBL3234973	COc1ccc(-c2cc3cc(F)ccc3nc2C(=O)c2ccccc2)cc1		CHEMBL4087967	O=C(Nc1ccc(Oc2ncnc3cc(Cl)ccc23)nc1)c1ccc(-c2ccccn2)s1		CHEMBL4163357	COc1cc(-c2cnc3c(N4CCO[C@H](C)C4)snc3c2)ccc1N
CHEMBL515239	COC(=O)[C@H](O)[C@H]1C(C)(C)[C@H](O)[C@@H]2CC3=C4CC(=O)O[C@@H](c5ccco5)[C@]4(C)CC[C@@H]3[C@@]1(C)C2=O		CHEMBL4293099	COc1cccc(-c2nn(Cc3ccc(NC(=O)OCCCCN(C)C)cc3)c(=O)c3ccccc23)c1		CHEMBL4288155	OC[C@H]1O[C@@H](n2c3ccc(Cl)cc3c3c(-c4cccs4)ncnc32)[C@H](F)[C@@H]1O
CHEMBL438428	O=c1ccn([C@H]2C[C@H](O)[C@@H](COC(c3ccccc3)(c3ccccc3)c3ccccc3)O2)c(=O)[nH]1		CHEMBL4284582	CN(C)CCCCN(C(=O)O)c1cccc(Cn2nc(-c3ccc(F)cc3)c3ccccc3c2=O)c1		CHEMBL4793357	CC1(C)CC(=O)C2=C(C1)N(c1ccccc1)C(c1cccc3ccccc13)N(c1ccccc1)C2
CHEMBL2403287	O=c1ccn([C@H]2C[C@H](OC(c3ccccc3)(c3ccccc3)c3ccccc3)[C@@H](COC(c3ccccc3)(c3ccccc3)c3ccccc3)O2)c(=O)[nH]1		CHEMBL4289792	OC[C@H]1O[C@@H](n2c3ccc(Cl)cc3c3c(-c4ccoc4)ncnc32)[C@@H](F)[C@@H]1O		CHEMBL4791477	CC(C)C1N(c2ccccc2)CC2=C(CC(C)(C)CC2=O)N1c1ccccc1
CHEMBL3763384	COc1ccc(C(c2c(O)c3ccccc3oc2=O)c2c(O)c3ccccc3oc2=O)cc1CSc1nc2ccccc2s1		CHEMBL4285074	Nc1ncnc2c1c1cc(Cl)ccc1n2[C@@H]1O[C@H](CO)[C@@H](O)[C@H]1F		CHEMBL4786057	COc1cc(Nc2ncnc3ccc(Br)cc23)cc(OC)c1OC
CHEMBL4212583	O=C(c1c[nH]c2ccccc12)C(Nc1cccc(F)c1)c1ccccc1		CHEMBL4281646	CSc1ncnc2c1c1cc(Cl)ccc1n2[C@@H]1O[C@H](CO)[C@@H](O)[C@H]1F		CHEMBL4798974	COc1cc(Nc2ncnc3cc(C#N)ccc23)cc(OC)c1OC
CHEMBL4205361	COc1cccc(NC(C(=O)c2c[nH]c3ccccc23)c2cccc(C)c2)c1		CHEMBL4451411	CN1CCN(c2nccc(Nc3ccc(-c4ccccc4)cc3)n2)CC1		CHEMBL535429	COc1cc(Nc2ccnc3ccc(C(F)(F)F)cc23)cc(OC)c1OC
CHEMBL4205233	COc1cccc(NC(C(=O)c2c[nH]c3ccccc23)c2ccsc2)c1		CHEMBL4550425	CCCCCOCc1c(Nc2cccc(O)c2)nc(N2CCOCC2)nc1C(=O)NCc1ccccc1		CHEMBL4126082	CC(C)OC(=O)[C@H](C)NP(=O)(OC[C@H]1O[C@@H](n2ccc(=O)[nH]c2=O)[C@](C)(O)[C@@H]1O)Oc1ccccc1
CHEMBL518068	C=C1CC2OC3[C@H]4C(C[C@@H](C)[C@@H](OC(C)=O)[C@@H]24)[C@@H](C)CO[C@@]3(C)CC[C@@H]1O		CHEMBL4440476	O=C1OCc2c(Nc3cccc(O)c3)nc(N3CCOCC3)nc21		CHEMBL1441897	NS(=O)(=O)c1ccc(N2N=C(c3ccccc3)CC2c2ccc(F)cc2)cc1
CHEMBL160	C/C=C/C[C@@H](C)[C@@H](O)[C@H]1C(=O)N[C@@H](CC)C(=O)N(C)CC(=O)N(C)[C@@H](CC(C)C)C(=O)N[C@@H](C(C)C)C(=O)N(C)[C@@H](CC(C)C)C(=O)N[C@@H](C)C(=O)N[C@H](C)C(=O)N(C)[C@@H](CC(C)C)C(=O)N(C)[C@@H](CC(C)C)C(=O)N(C)[C@@H](C(C)C)C(=O)N1C		CHEMBL2440347	CCCC[C@H](NC(=O)[C@H](CCCCN)NC(=O)[C@H](CCCNC(=N)N)NC(=O)c1ccc(/C=C2\SC(=O)N(CCc3ccccc3)C2=O)cc1)C(N)=O		CHEMBL4855606	CNc1nc(Nc2cccc(C(=O)O)c2)c2nc[nH]c2n1
CHEMBL4449852	COc1ccc(-c2cnc3[nH]cc(C#Cc4ccc(C)cc4)c3c2)cc1OC		CHEMBL2440179	CCCC[C@H](NC(=O)[C@H](CCCCN)NC(=O)[C@H](CCCNC(=N)N)NC(=O)c1ccc(/C=C2\SC(=O)NC2=O)cc1)C(N)=O		CHEMBL4449100	C[C@@H](c1ccc(Cl)cc1)n1nnc2c1NC(=O)C[C@]21C(=O)N(C)c2ccc(Cl)cc21
CHEMBL289277	Cc1cc(O)c2c(c1)C(=O)c1cc(O)cc(O)c1C2=O		CHEMBL2440176	C=CCN1C(=O)/C(=C/c2ccc(C(=O)N[C@@H](CCCNC(=N)N)C(=O)N[C@@H](CCCCN)C(=O)N[C@@H](CCCC)C(N)=O)cc2)SC1=S		CHEMBL4465052	CCCCCCCCCCN1C(=O)[C@]2(CC(=O)Nc3c2nnn3[C@@H](C)c2ccc(Cl)cc2)c2cc(Cl)ccc21
CHEMBL4583315	O=C(Nc1nc2cc(O)c(O)cc2s1)[C@@H]1CCCN1S(=O)(=O)c1ccc([N+](=O)[O-])cc1		CHEMBL2146847	OC[C@H]1O[C@@H](n2c3ccc(Cl)cc3c3c(-c4ccsc4)ncnc32)[C@H](O)[C@@H]1O		CHEMBL4579860	CC(C)CN1C(=O)[C@]2(CC(=O)Nc3c2nnn3[C@@H](C)c2ccc(Cl)cc2)c2cc(Cl)ccc21
CHEMBL4562059	COc1cc2nc(NC(=O)[C@@H]3CCCN3S(=O)(=O)c3ccc(C)cc3)sc2cc1OC		CHEMBL2146849	OC[C@H]1O[C@@H](n2c3ccc(Cl)cc3c3c(-c4ccccc4)ncnc32)[C@H](O)[C@@H]1O		CHEMBL4437627	C=CCN1C(=O)[C@]2(CC(=O)Nc3c2nnn3[C@@H](C)c2ccc(Cl)cc2)c2cc(Cl)ccc21
CHEMBL448322	COC(=O)c1sc(-c2ccc(Cl)cc2)nc1C(Br)Br		CHEMBL2146945	OC[C@H]1O[C@@H](n2c3ccc(-c4ccccc4)cc3c3c(-c4ccco4)ncnc32)[C@H](O)[C@@H]1O		CHEMBL4452557	C[C@@H](c1ccc(Cl)cc1)n1nnc2c1NC(=O)C[C@]21C(=O)N(Cc2ccc(Cl)c(F)c2)c2ccc(Cl)cc21
CHEMBL4483740	COc1ncnc2c1c1occc1n2[C@@H]1O[C@H](CO)[C@@H](O)[C@H]1O		CHEMBL4210261	COc1cccc(NC(C(=O)c2c[nH]c3ccccc23)c2ccccc2C)c1		CHEMBL4746133	COc1cc(Nc2ccnc3cc(C(F)(F)F)ccc23)cc(OC)c1OC
CHEMBL3426584	O=C1CC2(CNc3ccc(Cl)cc32)c2cnn(Cc3ccc(Cl)cc3)c2N1		CHEMBL4209093	COc1cccc(NC(C(=O)c2c[nH]c3ccccc23)c2ccncc2)c1		CHEMBL4575895	COc1cc(Nc2ccnc3cc(C#N)ccc23)cc(OC)c1OC
CHEMBL3426576	O=C1C[C@]2(C(=O)Nc3ccc(Cl)cc32)c2cnn(Cc3ccc(Cl)cn3)c2N1		CHEMBL4204641	COc1cc(NC(C(=O)c2c[nH]c3ccc(CO)cc23)c2ccccc2)cc(OC)c1		CHEMBL4778334	COc1cc(Nc2ncnc3cc(Cl)ccc23)cc(OC)c1OC
CHEMBL3426546	COc1ccc(Cn2ncc3c2NC(=O)CC32C(=O)Nc3ccc(Cl)cc32)cc1		CHEMBL4454990	CCCCCOCc1c(Nc2ccc(S(N)(=O)=O)cc2)nc(N2CCOCC2)nc1C(=O)NCCOc1ccccc1		CHEMBL4782290	COc1cc(Nc2ccnc3cc(Br)ccc23)cc(OC)c1OC
CHEMBL479091	O=c1ccn(Cc2cn([C@H]3C[C@H](O)[C@@H](CO)O3)nn2)c(=O)[nH]1		CHEMBL4565849	Nc1nccc2c1ncn2C1=CC[C@@H](O)[C@H]1O		CHEMBL4850709	FC(F)(F)c1cccc(Nc2nc(NCCOc3ccccc3)c3nc[nH]c3n2)c1
CHEMBL3734874	FC(F)(F)c1ccc2nn(Cc3ccc(Cl)cc3)nc2c1		CHEMBL2064208	O=C1[C@@H](Oc2ccccc2)[C@@H](c2ccccc2)N1CCCn1cnc2c(NCc3ccccc3)ncnc21		CHEMBL4782919	CC(CC(=O)O)NC(=O)c1cc(-c2ccccc2)c(=O)n2c1sc1ccc(OC3CCCCC3)cc12
CHEMBL4291785	CN(C)CCCCN(C(=O)O)c1ccc(Cn2nc(-c3ccc(F)cc3)c3ccccc3c2=O)cc1		CHEMBL2016757	N#C[C@@]1(c2ccc3c(N)ncnn23)O[C@H](CO)[C@@H](O)[C@H]1O		CHEMBL4855476	NC(=O)c1cccc(NC(=O)[C@@H](NC(=O)c2ccc(C(=O)c3ccccc3)cc2)c2ccc(OCc3ccccc3)cc2)c1
CHEMBL4282094	CN(C)CCCC(=O)Nc1ccc(CN2N=C(c3ccc(F)cc3)C3C=CC=CC3C2=O)cc1		CHEMBL2064288	COc1ccccc1[C@@H]1[C@H](Oc2ccccc2)C(=O)N1CCn1cnc2c(NCc3ccccc3)ncnc21		CHEMBL4565921	C[C@@H](c1ccc(Cl)cc1)n1nnc2c1NC(=O)C[C@]21C(=O)N(Cc2cccc(F)c2)c2ccc(Cl)cc21
CHEMBL4285875	CCCCOC(=O)Nc1ccc(CN2N=C(c3ccc(F)cc3)C3C=CC=CC3C2=O)cc1		CHEMBL2064292	CC(C)N1C(=O)[C@H](CCCn2cnc3c(NCc4ccccc4)ncnc32)[C@H]1c1ccccc1F		CHEMBL4793507	Cc1ccc(NC(=O)c2ccccc2C(=O)Nc2ccc(F)cc2)c(-c2ccsc2)c1
CHEMBL4281850	CN(C)CCCCOC(=O)Nc1ccc(Cn2nc(-c3ccccc3F)c3ccccc3c2=O)cc1		CHEMBL2064297	CO[C@@H]1C(=O)N(CCCn2cnc3c(NCc4ccccc4)ncnc32)[C@@H]1c1ccc(C(C)C)cc1		CHEMBL4785973	O=C(NCc1ccc(-c2ccsc2)cc1)c1nccnc1C(=O)Nc1ccc(F)cc1
CHEMBL4286300	COc1ccc(-c2nn(Cc3ccc(NC(=O)OCCCCN(C)C)cc3)c(=O)c3ccccc23)cc1		CHEMBL2064300	OC[C@@H](Oc1ccccc1)[C@H](NCCCn1cnc2c(NCc3ccccc3)ncnc21)c1ccccc1		CHEMBL4874402	COc1cccc(Cn2c3ccc(-c4cccc(/C(N)=N/O)c4)cc3c3cc(-c4cccc(/C(N)=N/O)c4)ccc32)c1
CHEMBL3765560	Brc1ccc(-c2nnc(/C=C/c3ccc(Br)s3)o2)cc1		CHEMBL2440341	CCCC[C@H](NC(=O)[C@H](CCCCN)NC(=O)[C@H](CCCNC(=N)N)NC(=O)c1ccc(/C=C(\C#N)C(=O)NC2CC2)cc1)C(N)=O		CHEMBL4174075	COc1cc(-c2cnc3c(N4CCO[C@@H](C)C4)snc3c2)ccc1N
CHEMBL2440335	CCCC[C@H](NC(=O)[C@H](CCCCN)NC(=O)[C@H](CCCNC(=N)N)NC(=O)CC1SC(=S)N(Cc2ccc(OC)cc2)C1=O)C(N)=O		CHEMBL2042318	Nc1nc(N)c2ccc(Oc3ccccc3)cc2n1		CHEMBL4163801	COc1cc(-c2cnc3c(NC4CCOCC4)snc3c2)ccc1N
CHEMBL3426581	O=C1CC2(C(=O)Nc3ccc(Cl)cc32)c2cnn(-c3ccc(Cl)cc3)c2N1		CHEMBL2440159	CCCC[C@H](NC(=O)[C@H](CCCCN)NC(=O)[C@H](CCCNC(=N)N)NC(=O)c1ccc(/C=C2\SC(=S)N(Cc3ccc(OC)cc3)C2=O)cc1)C(N)=O		CHEMBL4785654	Cc1ccc(NC(=O)c2nccnc2C(=O)Nc2ccc(C)cc2-c2cc(C)n[nH]2)cc1
CHEMBL3426544	O=C1CC2(C(=O)Nc3ccc(Cl)cc32)c2cnn(Cc3cccc(Cl)c3)c2N1		CHEMBL2440353	CCCC[C@H](NC(=O)[C@H](CCCCN)NC(=O)[C@H](CCCNC(=N)N)NC(=O)c1ccc(/C=C2\SC(=O)N(C3CCCC3)C2=O)cc1)C(N)=O		CHEMBL4743160	Cc1ccc(NC(=O)c2nccnc2C(=O)Nc2ccc(C)cc2-c2ccc(C)s2)cc1
CHEMBL2403297	O=c1[nH]cnc2c1ncn2[C@@H]1O[C@H](COC(c2ccccc2)(c2ccccc2)c2ccccc2)[C@@H](O)[C@H]1OC(c1ccccc1)(c1ccccc1)c1ccccc1		CHEMBL3809079	COc1cc(C)c(C(=O)NS(=O)(=O)c2ccccc2)cc1-c1ccc(C#CCO)s1		CHEMBL4853068	CNc1nc(Nc2cccc(C(=O)OC)c2)c2nc[nH]c2n1
CHEMBL2403294	O=c1[nH]c(=O)n([C@@H]2O[C@H](COC(c3ccccc3)(c3ccccc3)c3ccccc3)[C@@H](O)[C@H]2OC(c2ccccc2)(c2ccccc2)c2ccccc2)cc1Cl		CHEMBL3426590	O=C1CC2(C(=O)Nc3ccc(C(F)(F)F)cc32)c2cnn(Cc3ccc(Cl)cc3)c2N1		CHEMBL4870507	O=C(O)c1cccc(Nc2nc(NCCOc3ccccc3)nc3[nH]cnc23)c1
CHEMBL3735807	COc1ccc(Cn2nnc3cc(Cl)c(Cl)cc32)cc1		CHEMBL3426578	O=C1CC2(C(=O)Nc3ccc(Cl)cc32)c2cnn(Cc3ccc(Cl)nc3)c2N1		CHEMBL4854604	FC(F)(F)c1cc(NNc2nc(NCCOc3ccccc3)nc3[nH]cnc23)cc(C(F)(F)F)c1
CHEMBL1631699	CC#C[C@@]1(O)[C@H](O)[C@@H](CO)O[C@H]1n1cnc2c(N)ncnc21		CHEMBL4469548	Oc1cccc(Nc2nc(NCc3ccc(-c4ccccc4)cc3)nc3nc[nH]c23)c1		CHEMBL4798430	COc1cc(Nc2ncnc3cc(F)ccc23)cc(OC)c1OC
CHEMBL463297	C=C1CC2OC3[C@H]4C(C[C@@H](C)[C@@H](OC(C)=O)[C@@H]24)[C@@H](C)CO[C@@]3(C)CC[C@H]1OO		CHEMBL1080997	CC(C)=CCC/C(C)=C/C=O		CHEMBL309682	COc1cc2ncnc(Nc3cc(OC)c(OC)c(OC)c3)c2cc1OC
CHEMBL3234966	COc1ccc(-c2cc3ccccc3nc2C(O)c2ccccc2)cc1		CHEMBL1397	CC[C@@H]([C@H](C)O)n1ncn(-c2ccc(N3CCN(c4ccc(OC[C@@H]5CO[C@@](Cn6cncn6)(c6ccc(F)cc6F)C5)cc4)CC3)cc2)c1=O		CHEMBL4800444	COc1cc(Nc2cc(C)nc3ccccc23)cc(OC)c1OC
CHEMBL2403293	O=c1[nH]c(=O)n([C@@H]2O[C@H](COC(c3ccccc3)(c3ccccc3)c3ccccc3)[C@@H](OC(c3ccccc3)(c3ccccc3)c3ccccc3)[C@H]2O)cc1Cl		CHEMBL4066670	O=C(Nc1ccccc1OCc1ccc(Cl)c(Cl)c1)c1ccco1		CHEMBL4759285	COc1cc(Nc2ccnc3cc(F)c(F)cc23)cc(OC)c1OC
CHEMBL2403292	O=c1[nH]c(=O)n([C@@H]2O[C@H](COC(c3ccccc3)(c3ccccc3)c3ccccc3)[C@@H](O)[C@H]2O)cc1Cl		CHEMBL4279021	CN(C)CCCCOC(=O)Nc1ccc(Cn2nc(-c3cnn(C)c3)c3ccccc3c2=O)cc1		CHEMBL4764297	COc1ccc2c(Nc3cc(OC)c(OC)c(OC)c3)cc(C)nc2c1
CHEMBL4162927	CSCCOP(=O)(NCCc1c[nH]c2ccccc12)OC[C@H]1O[C@@H](n2cnc3c(=O)[nH]c(N)nc32)[C@](C)(O)[C@@H]1O		CHEMBL4293171	OC[C@H]1O[C@@H](n2c3ccc(Cl)cc3c3c(-c4ccsc4)ncnc32)[C@@H](F)[C@@H]1O		CHEMBL4784462	CC1(C)CC(=O)C2=C(C1)N(c1ccccc1)C(c1ccc(Cl)cc1)N(c1ccccc1)C2
CHEMBL4588155	COC(=O)CCCCCCCCCCNC(=O)[C@H]1O[C@H](O[C@H]2CC[C@@]3(C)[C@@H](CC[C@]4(C)[C@@H]3C(=O)C=C3[C@@H]5C[C@@](C)(C(=O)O)CC[C@]5(C)CC[C@]34C)C2(C)C)[C@H](O[C@@H]2O[C@H](C(=O)NCCCCCCCCCCC(=O)OC)[C@@H](O)[C@H](O)[C@H]2O)[C@@H](O)[C@@H]1O		CHEMBL116438	COc1cc(/C=C/C(=O)/C=C(O)/C=C/c2ccc(O)c(OC)c2)ccc1O		CHEMBL4783216	CC1(C)CC(=O)C2=C(C1)N(c1ccccc1)C(c1ccc(OC(F)(F)F)cc1)N(c1ccccc1)C2
CHEMBL4548535	CC[C@H](C)[C@H](NC(=O)[C@H]1O[C@H](O[C@H]2CC[C@@]3(C)[C@@H](CC[C@]4(C)[C@@H]3C(=O)C=C3[C@@H]5C[C@@](C)(C(=O)N[C@H](C(=O)O)[C@@H](C)CC)CC[C@]5(C)CC[C@]34C)C2(C)C)[C@H](O[C@@H]2O[C@H](C(=O)N[C@H](C(=O)O)[C@@H](C)CC)[C@@H](O)[C@H](O)[C@H]2O)[C@@H](O)[C@@H]1O)C(=O)O		CHEMBL4591383	CSc1ncnc2c1c1occc1n2[C@@H]1O[C@H](CO)[C@@H](O)[C@H]1O		CHEMBL4798952	CC1(C)CC(=O)C2=C(C1)N(c1ccccc1)C(c1ccc3ccccc3c1)N(c1ccccc1)C2
CHEMBL4571922	COC(=O)[C@@]1(C)CC[C@]2(C)CC[C@]3(C)C(=CC(=O)[C@@H]4[C@@]5(C)CC[C@H](O[C@H]6O[C@H](C(=O)N/N=C/c7ccc(O)cc7)[C@@H](O)[C@H](O)[C@H]6O[C@@H]6O[C@H](C(=O)N/N=C/c7ccc(O)cc7)[C@@H](O)[C@H](O)[C@H]6O)C(C)(C)[C@@H]5CC[C@]43C)[C@@H]2C1		CHEMBL4586991	Cc1ccc(S(=O)(=O)N(CCCC(=O)C2CCCCCC2)c2ccccc2)cc1		CHEMBL4778118	CC1(C)CC(=O)C2=C(C1)N(c1ccc(Cc3ccccc3)cc1)C(c1ccc(Br)cc1)N(c1ccc(Cl)cc1)C2
CHEMBL3334981	COc1ccc(-c2cnc3[nH]cc(NC(=O)C4CCCCC4)c3c2)cc1OC		CHEMBL4250556	Nc1nc2c(ncn2[C@H]2C=C(F)[C@@H](OCP(=O)([O-])[O-])C2)c(=O)[nH]1.[Na+].[Na+]		CHEMBL4062853	Cc1ccc(Nc2nc(Cl)nc3[nH]cnc23)c(-c2cc(C)n[nH]2)c1
CHEMBL4443908	COc1ccc(C(=O)Nc2c[nH]c3ncc(-c4ccc(OC)c(OC)c4)cc23)cc1		CHEMBL4286949	CN(C)CCCCOC(=O)Nc1ccc(Cn2nc(-c3ccccc3)c3ccccc3c2=O)cc1		CHEMBL4100267	Cc1ccc(Nc2nc(Nc3ccc(C)cc3-c3cc(C)n[nH]3)c3ccccc3n2)cc1
CHEMBL3233032	O=C(c1ccc(O)cc1)c1nc2ccccc2cc1-c1ccc(OCCN2CCCCC2)cc1		CHEMBL4279048	CN(C)CCCCOC(=O)Nc1ccc(Cn2nc(-c3ccccc3C(F)(F)F)c3ccccc3c2=O)cc1		CHEMBL4071574	Clc1ccc(-c2ccc(-c3nc(NCc4cccnc4)c4ccccc4n3)s2)cc1
CHEMBL597776	O=C(O)CCC(=O)N1NC(c2c(O)nc3ccc(Cl)cc3c2-c2ccccc2)=C[C@@H]1c1ccc(Br)cc1		CHEMBL4447775	Nc1ncnc2c1c1occc1n2[C@@H]1O[C@H](CO)[C@@H](O)[C@H]1O		CHEMBL4214021	COc1cccc(NC(C(=O)c2c[nH]c3ccccc23)c2ccc(C)nc2)c1
CHEMBL4173986	Fc1ccc2nc(-c3cc(-c4ccccc4)n(-c4ccccc4)n3)ccc2c1		CHEMBL4459123	CC[C@H](C)[C@H](NC(=O)[C@H](C)NC(=O)CNC(=O)[C@H](Cc1ccccc1)NC(=O)[C@@H](NC(=O)[C@H](CCC(N)=O)NC(=O)[C@H](Cc1cnc[nH]1)NC(=O)[C@H](CC(C)C)NC(=O)[C@H](C)NC(=O)[C@H](CCCCN)NC(=O)CNC(=O)[C@@H](NC(=O)[C@H](CO)NC(=O)[C@@H](NC(=O)[C@H](Cc1ccccc1)NC(=O)[C@@H](NC(=O)CNC(=O)CNC(=O)[C@H](CC(C)C)NC(=O)[C@H](CO)NC(=O)CNC(=O)[C@H](Cc1ccccc1)NC(=O)[C@H](CC(=O)O)NC(=O)[C@H](Cc1c[nH]c2ccccc12)NC(=O)[C@H](C)NC(=O)[…		CHEMBL4128451	C#C[C@@]1(O)[C@H](O)[C@@H](CO[P@@](=O)(N[C@@H](C)C(=O)OC(C)C)Oc2ccccc2)O[C@H]1n1ccc(=O)[nH]c1=O
CHEMBL4164104	Fc1ccc(-n2nc(-c3ccccc3)cc2-c2ccc3cc(F)ccc3n2)cc1		CHEMBL4740155	COc1cc(Nc2ccnc3cc(I)ccc23)cc(OC)c1OC		CHEMBL4175245	NS(=O)(=O)c1ccc(N2N=C(c3ccc(OCc4ccccc4)cc3)CC2c2cccc(F)c2)cc1
CHEMBL4175012	COc1ccc(-n2nc(-c3ccc(F)cc3)cc2-c2ccc3cc(F)ccc3n2)cc1		CHEMBL4746235	COc1cc(Nc2ccnc3ccc(S(C)(=O)=O)cc23)cc(OC)c1OC		CHEMBL4534385	Nc1ncc(Br)c2c1ncn2C1=CC[C@@H](O)[C@H]1O
CHEMBL4440558	CC(C)C(=O)OC[C@@]1(N=[N+]=[N-])O[C@@H](n2ccc(N)cc2=O)[C@H](OC(=O)C(C)C)[C@@H]1OC(=O)C(C)C		CHEMBL4740467	COc1cc(Nc2ncnc3ccccc23)cc(OC)c1OC		CHEMBL4580524	Cn1ccc2c1c1c(-c3ccco3)ncnc1n2[C@@H]1O[C@H](CO)[C@@H](O)[C@H]1O
CHEMBL4441582	OC[C@@H]1[C@@H](O)[C@H](O)[C@@H](O)CN1CCCCCCCCC1CCCO1		CHEMBL4751299	COc1cc(Nc2cc(C)nc3ccc(Br)cc23)cc(OC)c1OC		CHEMBL4446745	O=C(O)Cc1cccc(OS(=O)(=O)c2ccc(NC(=O)Nc3ccc(C(F)(F)F)cc3[N+](=O)[O-])cc2)c1
CHEMBL1370977	Cc1cc(N2CCN(C)CC2)ccc1NC(=O)c1c2c(nc3ccccc13)CCN(Cc1ccccc1)C2		CHEMBL4640027	CCCCc1cn(-c2ccc(NC(=O)Nc3cccc(F)c3)cc2)nn1		CHEMBL4589668	CN(C)c1ncnc2c1c1c(ccn1C)n2[C@@H]1O[C@H](CO)[C@@H](O)[C@H]1O
CHEMBL4526128	O=C(N[C@@H](Cc1ccc(O)cc1)C(=O)O)c1cc(-c2ccccc2)c(=O)n2c1sc1ccc(OC3CCCCC3)cc12		CHEMBL4644986	O=C1OC2(c3ccc(O)cc3Oc3cc(O)ccc32)c2cc(NC(=S)NCCOCc3cn(-c4cccc(S(=O)(=O)Nc5ccccc5C(F)(F)F)c4)nn3)ccc21		CHEMBL4576288	Cn1ccc2c3c(-c4ccco4)ncnc3n([C@@H]3O[C@H](CO)[C@@H](O)[C@H]3O)c21
CHEMBL4456559	Nc1c(C(=O)Nc2nc(-c3ccccc3)cs2)sc2nc3c(cc12)CN(c1ccccc1)CC3		CHEMBL4796295	CC1(C)CC(=O)C2=C(C1)N(c1ccccc1)C(c1ccc(Br)cc1)N(c1ccc(C(C)(C)C)cc1)C2		CHEMBL4859678	OCCNc1nc(Nc2cccc(C(F)(F)F)c2)c2nc[nH]c2n1
CHEMBL1650595	NCC(=O)Nc1ccc(-n2nc(C(F)(F)F)cc2-c2ccc3c(ccc4ccccc43)c2)cc1		CHEMBL4777811	CC1(C)CC(=O)C2=C(C1)N(c1ccccc1)C(c1ccc(F)cc1)N(c1ccccc1)C2		CHEMBL4853457	Oc1ccc(Nc2nc(NCCOc3ccccc3)nc3[nH]cnc23)cc1O
CHEMBL1259059	CC(C)OC(=O)[C@H](C)N[P@](=O)(OC[C@H]1O[C@@H](n2ccc(=O)[nH]c2=O)[C@](C)(F)[C@@H]1O)Oc1ccccc1		CHEMBL4792059	CC1(C)CC(=O)C2=C(C1)N(c1ccccc1)C(c1ccc(Br)cc1)N(c1ccc(Br)cc1)C2		CHEMBL4751746	Cc1ccc(NC(=O)c2ccccc2C(=O)Nc2ccccc2-c2cc(C)n[nH]2)cc1
CHEMBL1433	C[C@H]1c2cccc(O)c2C(=O)C2=C(O)[C@]3(O)C(=O)C(C(N)=O)=C(O)[C@@H](N(C)C)[C@@H]3[C@@H](O)[C@@H]21		CHEMBL2042323	Nc1nc(N)c2c(OC3CCCCC3)cccc2n1		CHEMBL4752654	Cc1ccc(NC(=O)c2nccnc2C(=O)Nc2ccc(F)cc2)c(-c2cccs2)c1
CHEMBL4217307	COc1cccc(NC(C(=O)c2c[nH]c3ccccc23)c2ccccc2)c1OC		CHEMBL1138	O=C1[C@H](CC[C@H](O)c2ccc(F)cc2)[C@@H](c2ccc(O)cc2)N1c1ccc(F)cc1		CHEMBL3736487	COc1ccc(-n2nc3cc(Cl)c(Cl)cc3n2)cc1
CHEMBL4208082	COc1cccc(NC(C(=O)c2c[nH]c3ccccc23)c2ccc3nccnc3c2)c1		CHEMBL41	CNCCC(Oc1ccc(C(F)(F)F)cc1)c1ccccc1		CHEMBL3735111	COc1ccc(Cn2nc3ccc(C(F)(F)F)cc3n2)cc1
CHEMBL2062544	CC(C)N[C@H](c1ccccc1F)[C@H](CO)CCCn1cnc2c(NCc3ccccc3)ncnc21		CHEMBL4533571	COc1ccc(CN2Cc3c(Nc4ccc(S(N)(=O)=O)cc4)nc(N4CCOCC4)nc3C2=O)cc1		CHEMBL4779929	CC1(C)CC(=O)C2=C(C1)N(c1ccccc1)C(c1ccc(Br)cc1)N(c1ccccc1)C2
CHEMBL2165937	OC[C@@H]1[C@@H](O)[C@H](O)[C@@H](O)CN1CC/C=C/CCOc1cc(F)ccc1F		CHEMBL4466218	O=C(NCCc1ccccc1)c1nc(N2CCOCC2)nc(Nc2cccc(O)c2)c1CO		CHEMBL4211058	COc1cc(NC(C(=O)c2c[nH]c3cc(CCN(C)C)ccc23)c2ccccc2)cc(OC)c1
CHEMBL2165943	OC[C@@H]1[C@@H](O)[C@H](O)[C@@H](O)CN1CCCCCCOC1CCCC1		CHEMBL4468183	O=C(CN1C(=O)NC2(CCc3ccccc32)C1=O)NO		CHEMBL4210136	COc1cc(NC(C(=O)c2c[nH]c3ccccc23)c2ccccc2)cc(OCCCO)c1
CHEMBL268354	Nc1nc(N)c2ccccc2n1		CHEMBL4643909	C=C(C#Cc1cc(O)ccc1O)CC/C=C(\C)CC[C@H](O)C(C)(C)O		CHEMBL4754806	Cc1ccc(NC(=O)c2ccccc2C(=O)Nc2ccc(C)cc2-c2ccc(C)s2)cc1
CHEMBL2042313	COc1ccc2nc(N)nc(N)c2c1		CHEMBL4165878	C=C(C#CC1=C[C@@H](O)[C@@H](O)[C@H](O)[C@@H]1O)CC/C=C(\C)CCC=C(C)C		CHEMBL4798530	Cc1ccc(NC(=O)c2nccnc2C(=O)Nc2ccc(F)cc2)c(-c2ccc(C)s2)c1
CHEMBL4545306	COc1ccc(/C=C\c2cc(OC)c(OC)c(OC)c2)cc1NC(=O)[C@H](C)NC(=O)[C@H](CCCNC(=N)N)NC(=O)[C@H](CCCNC(=N)N)NC(=O)c1ccccc1		CHEMBL4634423	CC(C)CCc1cn(-c2ccc(NC(=O)Nc3ccccc3F)cc2)nn1		CHEMBL4847125	NC(=O)c1cccc(NC(=O)[C@@H](NC(=O)c2ccc(Oc3ccc4c(c3)OCO4)cc2)c2ccc(OCc3ccccc3)cc2)c1
CHEMBL4175102	COc1ccc(-c2cc(-c3ccc4cc(F)ccc4n3)n(-c3ccc(S(N)(=O)=O)cc3)n2)cc1		CHEMBL155333	COc1ccc(S(=O)(=O)N(CCO)c2ccccc2CN(C)C/C=C/c2ccc(Cl)cc2)cc1		CHEMBL4799409	CC(C)Oc1ccc(C2N(c3ccccc3)CC3=C(CC(C)(C)CC3=O)N2c2ccccc2)cc1
CHEMBL4171980	Fc1ccc(-c2cc(-c3ccc4cc(F)ccc4n3)n(-c3ccc(F)cc3)n2)cc1		CHEMBL4533642	O=C(CCCN(c1ccccc1)S(=O)(=O)c1ccc(OC(F)(F)F)cc1)C1CCCC1		CHEMBL4797906	Cc1ccc(NC(=O)c2ccccc2C(=O)Nc2ccc(F)cc2)c(-c2cc(C)n[nH]2)c1
CHEMBL3426589	O=C1CC2(C(=O)Nc3ccc(Br)cc32)c2cnn(Cc3ccc(Cl)cc3)c2N1		CHEMBL4288370	CC(c1ccc(N(CCCCN(C)C)C(=O)O)cc1)n1nc(-c2ccc(F)cc2)c2ccccc2c1=O		CHEMBL1689183	CCCc1cc(=O)oc2c(C(=O)CC(C)C)c(O)c(CC=C(C)C)c(O)c12
CHEMBL2163420	OC[C@@H]1[C@@H](O)[C@H](O)[C@@H](O)CN1CCCCCCOc1ccc(F)cc1		CHEMBL4293521	CN(C)CCCCOC(=O)Nc1ccc(Cn2nc(-c3cccc(F)c3)c3ccccc3c2=O)cc1		CHEMBL4575134	CC[C@H]1C[C@H]2CN3CCc4c([nH]c5ccc(OC)cc45)[C@](C(=O)OC)(C2)[C@H]13
CHEMBL2165924	COc1ccccc1OCCCCCCN1C[C@H](O)[C@@H](O)[C@H](O)[C@H]1CO		CHEMBL2087140	CC(C)(O)CC[C@@H](O)[C@](C)(O)[C@H]1CC[C@@]2(O)C3=CC(=O)[C@@H]4C[C@@H](O)[C@@H](O)C[C@]4(C)[C@H]3[C@H](O)C[C@]12C		CHEMBL7568	CCN(CC)CCCC(C)Nc1c2ccc(Cl)cc2nc2ccc(OC)cc12
CHEMBL2165930	CCCOc1ccc(CCCN2C[C@H](O)[C@@H](O)[C@H](O)[C@H]2CO)cc1		CHEMBL2087151	CC(C)[C@@H](O)C[C@@H](O)[C@](C)(O)[C@H]1CC[C@@]2(O)C3=CC(=O)[C@@H]4C[C@@H](O)[C@@H](O)C[C@]4(C)[C@H]3CC[C@]12C		CHEMBL4763817	Cc1ccc(NC(=O)c2ccccc2NC(=O)c2ccc(F)cc2)c(-c2ccc(C)s2)c1
CHEMBL2163434	CCC1CCC(OCCCCCCN2C[C@H](O)[C@@H](O)[C@H](O)[C@H]2CO)CC1		CHEMBL3794280	C=C(C[C@@H](O)[C@](C)(O)[C@H]1CC[C@@]2(O)C3=CC(=O)[C@@H]4C[C@@H](O)[C@@H](O)C[C@]4(C)[C@H]3CC[C@]12C)C(C)(C)O		CHEMBL4746370	Cc1ccc(NC(=O)c2ccccc2C(=O)Nc2ccc(C)cc2-c2cccs2)cc1
CHEMBL478673	Nc1ccn(Cc2cn([C@H]3C[C@H](O)[C@@H](CO)O3)nn2)c(=O)n1		CHEMBL224128	CC(C)(O)CC[C@@H](O)[C@](C)(O)[C@H]1CC[C@@]2(O)C3=CC(=O)[C@@H]4C[C@@H](O)[C@@H](O)C[C@]4(C)[C@H]3CC[C@]12C		CHEMBL4568250	CC(C)N1C(=O)C[C@]2(C(=O)Nc3ccc(Cl)cc32)c2nnn([C@@H](C)c3ccc(Cl)cc3)c21
CHEMBL455561	C#CCn1ccc2c(Cl)ncnc21		CHEMBL4162022	NS(=O)(=O)c1ccc(N2N=C(c3ccc(OCc4ccccc4)cc3)CC2c2ccccc2)cc1		CHEMBL4569686	C[C@@H](c1ccc(Cl)cc1)n1nnc2c1NC(=O)C[C@]21C(=O)N(CCc2ccccc2)c2ccc(Cl)cc21
CHEMBL515302	O=C(Nc1ncnc2c1ncn2Cc1cn([C@H]2C[C@H](O)[C@@H](CO)O2)nn1)c1ccccc1		CHEMBL4070073	Fc1ccc(-c2cc(-c3ccc4cc(F)ccc4n3)n(-c3ccccc3)n2)cc1		CHEMBL4452845	C[C@@H](c1ccc(Cl)cc1)n1nnc2c1NC(=O)C[C@]21C(=O)N(Cc2ccncc2)c2ccc(Cl)cc21
CHEMBL515929	Cc1ccc(OC[C@H]2O[C@@H](n3cc(Cn4ccc5c(Cl)ncnc54)nn3)C[C@@H]2Oc2ccc(C)cc2)cc1		CHEMBL4747909	COc1cc(Nc2c(C#N)cnc3cc(Br)ccc23)cc(OC)c1OC		CHEMBL4459948	C[C@@H](c1ccc(Cl)cc1)n1nnc2c1NC(=O)C[C@]21C(=O)N(Cc2ccc(Cl)nc2)c2ccc(Cl)cc21
CHEMBL478430	C#CCn1cnc2c(N)ncnc21		CHEMBL3581153	Cc1cc(OCc2cccc(F)c2)cc(=O)n1Cc1ccc(Cl)cc1		CHEMBL4532280	C[C@@H](c1ccc(Cl)cc1)n1nnc2c1NC(=O)C[C@]21C(=O)N(CC(=O)O)c2ccc(Cl)cc21
CHEMBL4168625	COc1ccc(-n2nc(-c3ccccc3)cc2-c2ccc3cc(F)ccc3n2)cc1		CHEMBL3581156	Cc1cc(OCc2ccc(F)cc2F)cc(=O)n1Cc1cn(Cc2cccc(Br)c2)nn1		CHEMBL4554332	C[C@@H](c1ccc(Cl)cc1)n1nnc2c1NC(=O)C[C@]21C(=O)N(CCCBr)c2ccc(Cl)cc21
CHEMBL4160700	COc1ccc(-c2cc(-c3ccc4cc(F)ccc4n3)n(-c3ccc(F)cc3)n2)cc1		CHEMBL4752102	COc1cc(Nc2ncnc3ccc(S(C)(=O)=O)cc23)cc(OC)c1OC		CHEMBL4436766	CNCCN1C(=O)[C@]2(CC(=O)Nc3c2nnn3[C@@H](C)c2ccc(Cl)cc2)c2cc(Cl)ccc21
CHEMBL3401563	C/C(=N\Nc1nc(-c2ccc(Cl)cc2)cs1)c1ccc(O)cc1		CHEMBL4789792	COc1cc(Nc2c(C#N)cnc3ccccc23)cc(OC)c1OC		CHEMBL4459642	C[C@@H](c1ccc(Cl)cc1)n1nnc2c1NC(=O)C[C@]21C(=O)N(CCCN2CCOCC2)c2ccc(Cl)cc21
CHEMBL4071759	C=CC(=O)Nc1cc(-n2c(=O)ccc3cnc4ccc(-c5cnc6ccccc6c5)cc4c32)ccc1C		CHEMBL4744716	COc1cc(Nc2c(C#N)cnc3ccc(S(C)(=O)=O)cc23)cc(OC)c1OC		CHEMBL4540549	C[C@@H](c1ccc(Cl)cc1)n1nnc2c1NC(=O)C[C@]21C(=O)N(CCOC(=O)CCCCCCCNC(=O)CCCC[C@@H]2SC[C@@H]3NC(=O)N[C@H]23)c2ccc(Cl)cc21
CHEMBL4077253	C=CC(=O)Nc1cc(-n2c(=O)ccc3cnc4ccc(-c5ccc6c(c5)OCO6)cc4c32)ccc1C		CHEMBL4648145	CC(C)CCc1cn(-c2ccc(NC(=O)Nc3cccc(F)c3)cc2)nn1		CHEMBL4877568	FC(F)(F)c1ccc(NNc2nc(NCCOc3ccccc3)nc3[nH]cnc23)cc1
CHEMBL4096470	C=CC(=O)Nc1cc(-n2c(=O)ccc3cnc4ccc(-c5cnn(C)c5)cc4c32)ccc1OCCNC(C)=O		CHEMBL3581155	Cc1cc(OCc2ccc(F)cc2F)cc(=O)n1Cc1ccc(-c2ccccc2)cc1		CHEMBL4873306	Fc1cccc(/N=N/c2nc(NCCOc3ccccc3)nc3[nH]cnc23)c1
CHEMBL4091170	C=CC(=O)Nc1cc(-n2c(=O)ccc3ccc4ccc(-c5cnn(C)c5)cc4c32)ccc1C		CHEMBL3581157	Cc1cc(OCc2ccc(F)cc2F)cc(=O)n1Cc1cn(Cc2cccc(C(F)(F)F)c2)nn1		CHEMBL4867349	Fc1cc(F)cc(/N=N/c2nc(NCCOc3ccccc3)nc3[nH]cnc23)c1
CHEMBL4075449	C=CC(=O)Nc1cc(-n2c(=O)ccc3cnc4ccc(-c5cn[nH]c5)cc4c32)ccc1C		CHEMBL4780003	CC1(C)CC(=O)C2=C(C1)N(c1ccccc1)C(c1ccc(Br)cc1)N(c1ccc(Oc3ccccc3)cc1)C2		CHEMBL4446630	COc1cc(Nc2ncnc3ccc(C(F)(F)F)cc23)cc(OC)c1OC
CHEMBL4083730	C=CC(=O)Nc1cc(-n2c(=O)ccc3cnc4ccc(N5CCOCC5)cc4c32)ccc1C		CHEMBL2164638	O=C(N/N=C\Cc1ccccc1)c1cc(/C=N/Nc2cccc(Br)c2)nc2ccccc12		CHEMBL4787738	COc1cc(Nc2ncnc3cc(I)ccc23)cc(OC)c1OC
CHEMBL4060369	C=CC(=O)N1CCc2ccc(-n3c(=O)n(C)c4cnc5ccc(-c6cnn(C)c6)cc5c43)cc21		CHEMBL4586051	NS(=O)(=O)c1ccc(Nc2nc(N3CCOCC3)nc3c2COC3=O)cc1		CHEMBL311959	COc1cc2nccc(Nc3cc(OC)c(OC)c(OC)c3)c2cc1OC
CHEMBL4070235	C=CC(=O)Nc1cc(-n2c(=O)ccc3ccc4ccc(-c5cn[nH]c5)cc4c32)ccc1C		CHEMBL3581166	OCCNc1nc(Nc2cccc(O)c2)c2nc[nH]c2n1		CHEMBL4755589	COc1ccc2nc(C)cc(Nc3cc(OC)c(OC)c(OC)c3)c2c1
CHEMBL4061571	C=CC(=O)Nc1cc(-n2c3c(ccc2=O)CCc2ccc(-c4cnn(C)c4)cc2-3)ccc1C		CHEMBL1631697	C=C[C@@]1(O)[C@H](O)[C@@H](CO)O[C@H]1n1cnc2c(N)ncnc21		CHEMBL4759328	COc1cc(Nc2ccnc3c(C)cccc23)cc(OC)c1OC
CHEMBL2163425	OC[C@@H]1[C@@H](O)[C@H](O)[C@@H](O)CN1CCCCCCOc1cccc(C(F)(F)F)c1		CHEMBL1631700	C#C[C@@]1(O)[C@H](O)[C@@H](CO)O[C@H]1n1cnc2c(=O)[nH]c(N)nc21		CHEMBL4848930	COc1ccc(S(=O)(=O)n2c3ccc(-c4cccc(/C(N)=N/O)c4)cc3c3cc(-c4cccc(/C(N)=N/O)c4)ccc32)cc1OC
CHEMBL2164656	CCOC(=O)c1cc(/C=N/Nc2ccc(C(C)C)cc2)c(O)c(/C=N/Nc2ccc(C(C)C)cc2)c1		CHEMBL4464067	COC(=O)[C@H](Cc1ccccc1)NC(=O)[C@H]1O[C@H](O[C@H]2CC[C@@]3(C)[C@@H](CC[C@]4(C)[C@@H]3C(=O)C=C3[C@@H]5C[C@@](C)(C(=O)N[C@@H](Cc6ccccc6)C(=O)OC)CC[C@]5(C)CC[C@]34C)C2(C)C)[C@H](O[C@@H]2O[C@H](C(=O)N[C@@H](Cc3ccccc3)C(=O)OC)[C@@H](O)[C@H](O)[C@H]2O)[C@@H](O)[C@@H]1O		CHEMBL4214447	COc1cc(NC(C(=O)c2c[nH]c3ccccc23)c2ccc(F)cc2)cc(OCCO)c1
CHEMBL2165928	CCCOc1ccccc1CCCN1C[C@H](O)[C@@H](O)[C@H](O)[C@H]1CO		CHEMBL4467583	COC(=O)[C@@]1(C)CC[C@]2(C)CC[C@]3(C)C(=CC(=O)[C@@H]4[C@@]5(C)CC[C@H](O[C@H]6O[C@H](C(=O)N/N=C/c7ccc(N(C)C)cc7)[C@@H](O)[C@H](O)[C@H]6O[C@@H]6O[C@H](C(=O)N/N=C/c7ccc(N(C)C)cc7)[C@@H](O)[C@H](O)[C@H]6O)C(C)(C)[C@@H]5CC[C@]43C)[C@@H]2C1		CHEMBL1191608	COc1ccc2ncnc(Nc3cc(OC)c(OC)c(OC)c3)c2c1
CHEMBL4092129	N=C(N)NCCC[C@@H]1NC(=O)[C@H](CCCNC(=N)N)NC(=O)[C@@H](CCCNC(=N)N)NC(=O)[C@@H](Cc2ccccc2)NC(=O)[C@H](Cc2ccc3ccccc3c2)NC(=O)[C@H](CCc2ccccc2)NC(=O)[C@H](CO)NC(=O)[C@H](CCCCN)NC1=O		CHEMBL4802111	CCCCCC(=O)N[C@H](C(=O)NCc1ccc(CNC(=N)N)cc1)c1ccc(OCc2ccccc2)cc1.O=C(O)C(F)(F)F		CHEMBL4750130	COc1ccc2c(Nc3cc(OC)c(OC)c(OC)c3)c(C#N)cnc2c1
CHEMBL3581151	Cc1cc(OCc2ccc(F)cc2F)cc(=O)n1Cc1ccc(C(F)(F)F)cc1		CHEMBL4646812	N=C(N)Nc1ccc(CNC(=O)[C@@H](NC(=O)c2ccc(OCc3ccccc3)cc2)c2ccc(OCc3ccccc3)cc2)cc1.O=C(O)C(F)(F)F		CHEMBL3734848	CC(C)(Oc1ccc(-n2nc3ccc(Cl)cc3n2)cc1)C(=O)O
CHEMBL3581158	COc1ccc2c(Nc3ccc(N4CCN(C)CC4)cc3)c(C#N)cnc2c1		CHEMBL605779	Cc1ccc(Cl)cc1NS(=O)(=O)c1ccc(NS(=O)(=O)c2ccc3ccccc3c2)cc1		CHEMBL3736259	COc1ccc2nn(-c3ccc(OC(C)(C)C(=O)O)cc3)nc2c1
CHEMBL3581162	Oc1cccc(Nc2nc(NCc3ccccc3)nc3[nH]cnc23)c1		CHEMBL2042325	Nc1nc(N)c2c(N3CCCC3)cccc2n1		CHEMBL4874341	Nc1ncc(Br)c2c1ncn2[C@@H]1C(F)=C[C@@H](O)[C@H]1O
CHEMBL4071337	C[C@@H]1NC(=O)[C@H](CCCCN)NC(=O)[C@H](CCCNC(=N)N)NC(=O)[C@H](CCCNC(=N)N)NC(=O)[C@@H](CCCNC(=N)N)NC(=O)[C@@H](Cc2ccccc2)NC(=O)[C@H](Cc2cccc3ccccc23)NC(=O)[C@H](CCc2ccccc2)NC1=O		CHEMBL4781652	CC1(C)CC(=O)C2=C(C1)N(c1ccccc1)C(c1ccccc1)N(c1ccccc1)C2		CHEMBL4473404	O=C(NCc1ccccc1)c1nc(N2CCOCC2)nc(Nc2cccc(O)c2)c1CO
CHEMBL4077064	C=CC(=O)N1CCc2ccc(-n3c(=O)ccc4cnc5ccc(-c6cnn(C)c6)cc5c43)cc21		CHEMBL4795700	COc1ccc(N2C3=C(CN(c4ccc(Cl)cc4)C2c2ccc(Br)cc2)C(=O)CC(C)(C)C3)cc1		CHEMBL4454666	O=C(Nc1ccc(S(=O)(=O)NCc2cccc(C(=O)O)c2)cc1)Nc1ccc(C(F)(F)F)cc1[N+](=O)[O-]
CHEMBL4060534	C=CC(=O)Nc1cc(-n2c(=O)ccc3cnc4ccc(-c5cnn(C)c5)cc4c32)ccc1C(=O)O		CHEMBL4465859	COc1ccc(/C=C\c2cc(OC)c(OC)c(OC)c2)cc1NC(=O)CNC(=O)CNC(=O)[C@H](CCCNC(=N)N)NC(=O)[C@H](CCCNC(=N)N)NC(=O)c1ccccc1		CHEMBL4556728	Nc1cc(C(F)(F)F)ccc1NC(=O)Nc1ccc(S(=O)(=O)Oc2cccc(CC(=O)Oc3cccc(CC(=O)O)c3)c2)cc1
CHEMBL1881501	Cc1ccc(C2CC(c3ccccc3)=NN2c2ccc(S(N)(=O)=O)cc2)cc1		CHEMBL67	COc1ccc(/C=C\c2cc(OC)c(OC)c(OC)c2)cc1O		CHEMBL4776091	CC1(C)CC(=O)C2=C(C1)N(Cc1ccccc1)C(c1ccccc1)N(Cc1ccccc1)C2
CHEMBL3426592	O=C1CC2(C(=O)Nc3ccc(Cl)cc32)c2cnn(Cc3ccc(Cl)cc3)c2N1		CHEMBL4558505	COc1ccc(-c2cnc3c(-c4ccc(OC)c(OC)c4)snc3c2)cc1OC		CHEMBL4794737	COc1ccc(C2N(c3ccccc3)CC3=C(CC(C)(C)CC3=O)N2c2ccccc2)cc1
CHEMBL4637828	O=C1CC2(C(=O)Nc3ccc(Cl)cc32)c2cnn(Cc3ccc(F)cc3)c2N1		CHEMBL4867545	N/C(=N\O)c1cccc(-c2ccc3c(c2)c2cc(-c4cccc(/C(N)=N/O)c4)ccc2n3CC(O)CS(=O)(=O)c2cccc(F)c2)c1		CHEMBL4781263	COc1ccc(N2CC3=C(CC(C)(C)CC3=O)N(c3ccccc3)C2c2ccc(Br)cc2)cc1
CHEMBL4639227	O=C1CC2(C(=O)Nc3ccc(Cl)cc32)c2cnn(Cc3ccc(Cl)c(Cl)c3)c2N1		CHEMBL4878425	COc1cccc(S(=O)(=O)n2c3ccc(-c4cccc(/C(N)=N/O)c4)cc3c3cc(-c4cccc(/C(N)=N/O)c4)ccc32)c1		CHEMBL4784459	CC1(C)CC(=O)C2=C(C1)N(c1ccccc1)C(c1ccc(Br)cc1)N(c1ccc(-c3ccccc3)cc1)C2
CHEMBL4634998	Cc1nn(Cc2ccc(Cl)cc2)c2c1C1(CC(=O)N2)C(=O)Nc2ccc(Cl)cc21		CHEMBL4641720	O=C(N[C@@H](Cc1cccc(O)c1)C(=O)O)c1cc(-c2ccccc2)c(=O)n2c1sc1ccc(OC3CCCCC3)cc12		CHEMBL4794266	CC1(C)CC(=O)C2=C(C1)N(c1ccccc1)C(c1ccc(Br)cc1)N(c1cccc(Cl)c1)C2
CHEMBL267099	Nc1ncnc2c1ccn2[C@@H]1O[C@H](CO)[C@@H](O)[C@H]1O		CHEMBL1078	CC(C)n1c(/C=C/[C@@H](O)C[C@@H](O)CC(=O)O)c(-c2ccc(F)cc2)c2ccccc21		CHEMBL4757828	CC(C)C(CC(=O)O)NC(=O)c1cc(-c2ccccc2)c(=O)n2c1sc1ccc(OC3CCCCC3)cc12
CHEMBL2165946	Cc1ccccc1OCCCCCCN1C[C@H](O)[C@@H](O)[C@H](O)[C@H]1CO		CHEMBL4460831	OC[C@@H]1[C@@H](O)[C@H](O)[C@@H](O)CN1CCCCC1CCCCC1		CHEMBL4753505	O=C(O)CC(NC(=O)c1cc(-c2ccccc2)c(=O)n2c1sc1ccc(OC3CCCCC3)cc12)c1ccccc1
CHEMBL4790723	Cc1ccc(NC(=O)c2nccnc2C(=O)Nc2ccc(F)cc2)c(-c2cc(C)n[nH]2)c1		CHEMBL4441561	N#C/C(=C\c1ccc(-c2ccc(C(=O)O)cc2)s1)c1nc2cc(Cl)ccc2[nH]1		CHEMBL4790309	C[C@@H](CO)NC(=O)c1cc(-c2ccccc2)c(=O)n2c1sc1ccc(OC3CCCCC3)cc12
CHEMBL4763525	Cc1ccc(NC(=O)c2nccnc2C(=O)Nc2ccc(F)cc2)c(-c2ccsc2)c1		CHEMBL4441383	COC(=O)c1[nH]c2ccc(Cl)cc2c1C(=O)c1cc(OC)c(O)c(OC)c1		CHEMBL1720448	Cc1cnc(NC(=O)c2cc(S(=O)(=O)N(C)C)ccc2N2CCCC2)s1
CHEMBL4746194	Cc1ccc(NC(=O)c2nccnc2C(=O)Nc2ccc(C)cc2-c2cccs2)cc1		CHEMBL4463028	CC1(C)O[C@H]1[C@H]1C[C@@H]([C@H]2CC[C@]3(C)C4=CC[C@H]5C(C)(C)C(=O)CC[C@]5(C)[C@H]4CC[C@@]23C)[C@H](O)O1		CHEMBL4854366	N=C(N)c1cccc(-c2ccc3c(c2)c2cc(-c4cccc(C(=N)N)c4)ccc2n3S(=O)(=O)c2cccc(C(F)(F)F)c2)c1
CHEMBL4776006	CC1(C)CC(=O)C2=C(C1)N(c1ccccc1)C(c1ccc([N+](=O)[O-])cc1)N(c1ccccc1)C2		CHEMBL253908	COc1cc2c(c(OC)c1OC)-c1c(cc(OC)c(OC)c1OC)C[C@@H](C)[C@@H](C)C2		CHEMBL4470440	CCCCN1C(=O)[C@]2(CC(=O)Nc3c2nnn3[C@@H](C)c2ccc(Cl)cc2)c2cc(Cl)ccc21
CHEMBL2146845	OC[C@H]1O[C@@H](n2c3ccc(Cl)cc3c3c(-c4ccoc4)ncnc32)[C@H](O)[C@@H]1O		CHEMBL3409050	COc1cc(/C(C#N)=C/c2cc3ccccc3[nH]2)cc(OC)c1OC		CHEMBL4871225	COc1cccc(Cn2c3ccc(-c4cccc(-c5noc(=O)[nH]5)c4)cc3c3cc(-c4cccc(-c5noc(=O)[nH]5)c4)ccc32)c1
CHEMBL2146943	OC[C@H]1O[C@@H](n2c3ccc(-c4ccco4)cc3c3c(-c4ccco4)ncnc32)[C@H](O)[C@@H]1O		CHEMBL3628516	C[C@]1(CO)O[C@@H](n2cc(-c3ccsc3)c3c(N)ncnc32)[C@H](O)[C@@H]1O		CHEMBL4850198	N/C(=N\O)c1cccc(-c2ccc3c(c2)c2cc(-c4cccc(/C(N)=N/O)c4)ccc2n3S(=O)(=O)c2cccc(C(F)(F)F)c2)c1
CHEMBL343382	CCOc1cccc2nc(N)nc(N)c12		CHEMBL323197	COc1c(O)cc2oc3cc(O)c(CC=C(C)C)c(O)c3c(=O)c2c1CC=C(C)C		CHEMBL4868241	COc1ccc(S(=O)(=O)n2c3ccc(-c4cccc(C(=N)N)c4)cc3c3cc(-c4cccc(C(=N)N)c4)ccc32)cc1
CHEMBL465423	CC1(C)C(=O)C=C[C@@]2(C)[C@H]1C[C@@H](O)[C@]1(C)[C@@H]2CC[C@@]2(C)[C@H](c3ccoc3)OC(=O)[C@H]3O[C@]321		CHEMBL4572441	CCCCCCCCCCCCCCNCCNC(=O)C[C@]1(O)C[C@@H](O)[C@@H](O)[C@H](O)C1.Cl		CHEMBL4853799	N/C(=N\O)c1cccc(-c2ccc3c(c2)c2cc(-c4cccc(/C(N)=N/O)c4)ccc2n3S(=O)(=O)c2ccccc2OC(F)(F)F)c1
CHEMBL4065609	COc1ccc(Cn2cnc3c(Cl)nc(Cl)nc32)cc1		CHEMBL4444463	COC(=O)[C@@]1(C)CC[C@]2(C)CC[C@]3(C)C(=CC(=O)[C@@H]4[C@@]5(C)CC[C@H](O[C@H]6O[C@H](C(=O)N/N=C/c7ccncc7)[C@@H](O)[C@H](O)[C@H]6O[C@@H]6O[C@H](C(=O)N/N=C/c7ccncc7)[C@@H](O)[C@H](O)[C@H]6O)C(C)(C)[C@@H]5CC[C@]43C)[C@@H]2C1		CHEMBL4854709	Cc1ccccc1S(=O)(=O)n1c2ccc(-c3cccc(/C(N)=N/O)c3)cc2c2cc(-c3cccc(/C(N)=N/O)c3)ccc21
CHEMBL4174536	NS(=O)(=O)c1ccc(N2N=C(c3ccc(Oc4ccccc4)cc3)CC2c2cccc(F)c2)cc1		CHEMBL4642467	COc1ccc(-c2ccc3nsc(N4C[C@H](C)O[C@H](C)C4)c3n2)cc1OC		CHEMBL4856584	N/C(=N\O)c1cccc(-c2ccc3c(c2)c2cc(-c4cccc(/C(N)=N/O)c4)ccc2n3Cc2ccc3c(c2)OCO3)c1
CHEMBL4169949	Cc1ccc(C2CC(c3ccc(Oc4ccccc4)cc3)=NN2c2ccc(S(N)(=O)=O)cc2)cc1		CHEMBL4472690	Cc1cc(N2C(=O)C(O)=C(C(=O)c3ccc(C)o3)C2c2cc(Cl)cc(Cl)c2)no1		CHEMBL4847477	COc1ccc(S(=O)(=O)n2c3ccc(-c4cccc(/C(N)=N/O)c4)cc3c3cc(-c4cccc(/C(N)=N/O)c4)ccc32)cc1Br
CHEMBL4172978	Cc1ccc(C2CC(c3ccc(OCc4ccccc4)cc3)=NN2c2ccc(S(N)(=O)=O)cc2)cc1		CHEMBL4577103	CC[C@H](C)[C@H](NC(=O)[C@H](CC(C)C)NC(=O)[C@@H](NC(=O)[C@H](Cc1ccccc1)NC(=O)[C@H](Cc1c[nH]c2ccccc12)NC(=O)[C@@H](N)Cc1ccccc1)[C@@H](C)O)C(=O)N[C@@H](CCCCN)C(=O)N[C@H](C(=O)N[C@@H](CCC(N)=O)C(=O)N[C@@H](C)C(=O)N[C@@H](CCCCN)C(=O)N[C@@H](CCC(N)=O)C(=O)N1CCC[C@H]1C(=O)N[C@@H](C)C(=O)N[C@@H](CCCNC(=N)N)C(=O)N[C@@H](Cc1ccc(O)cc1)C(=O)N[C@@H](CCCNC(=N)N)C(=O)N[C@@H](CCCNC(=N)N)C(=O)N[C@@H](Cc1ccccc1)C(…		CHEMBL4854672	N/C(=N\O)c1cccc(-c2ccc3c(c2)c2cc(-c4cccc(/C(N)=N/O)c4)ccc2n3S(=O)(=O)c2ccc(Br)c(F)c2)c1
CHEMBL4163087	NS(=O)(=O)c1ccc(N2N=C(c3ccc(Oc4ccccc4)cc3)CC2c2cccc(Cl)c2)cc1		CHEMBL4464214	CC(C)(C)c1ccc(/C=C2\SC(=S)N(CCC(=O)O)C2=O)cc1		CHEMBL4859071	N/C(=N\O)c1cccc(-c2ccc3c(c2)c2cc(-c4cccc(/C(N)=N/O)c4)ccc2n3CCCCOc2ccc3ccc(=O)[nH]c3c2)c1
CHEMBL4177444	Cc1cccc(C2CC(c3ccc(OCc4ccccc4)cc3)=NN2c2ccc(S(N)(=O)=O)cc2)c1		CHEMBL573452	O=C(Nc1cccc(Cn2cc(-c3cccc(S(=O)(=O)Nc4ccccc4C(=O)O)c3)cn2)c1)c1ccc(C(=O)c2ccccc2)cc1		CHEMBL4240805	Nc1nc(O)c2ncn([C@H]3C=C(I)[C@@H](OCP(=O)([O-])[O-])C3)c2n1.[Na+].[Na+]
CHEMBL4125970	CC#C[C@@]1(F)[C@H](O)[C@@H](CO[P@@](=O)(N[C@@H](C)C(=O)OC(C)C)Oc2ccccc2)O[C@H]1n1ccc(=O)[nH]c1=O		CHEMBL470269	CC(=C\C(=O)O)/C=C(\C)C[C@H](C)CCCC[C@H]1OC(=O)[C@@H]1CO		CHEMBL4872472	OCCNc1nc(Nc2cccc(F)c2)c2nc[nH]c2n1
CHEMBL4083391	C=CC(=O)Nc1cc(-n2c(=O)ccc3ccc4ccc(-c5ccc6ccncc6c5)cc4c32)ccc1C		CHEMBL54440	CC[C@H](C)C(=O)O[C@H]1CCC=C2C=C[C@H](C)[C@H](CC[C@@H]3C[C@@H](O)CC(=O)O3)[C@H]21		CHEMBL4586588	COc1cc(Nc2ccnc3ccccc23)cc(OC)c1OC
CHEMBL4064534	Cc1ccc(-n2c(=O)ccc3ccc4ccc(-c5cnn(C)c5)cc4c32)cc1NC(=O)/C=C/CN(C)C		CHEMBL4645917	COc1cc(-c2cnc3c(N4C[C@H](C)O[C@H](C)C4)snc3c2)ccc1C(=O)O		CHEMBL4857319	N/C(=N\O)c1cccc(-c2ccc3c(c2)c2cc(-c4cccc(/C(N)=N/O)c4)ccc2n3S(=O)(=O)c2cccc(OC(F)(F)F)c2)c1
CHEMBL4752149	O=C(NCc1ccc(-c2ccsc2)cc1)c1ccccc1C(=O)Nc1ccc(F)cc1		CHEMBL4203207	CCOc1cc(NC(C(=O)c2c[nH]c3ccccc23)c2ccccc2)cc(OC)c1		CHEMBL4876394	O=C(Nc1nc2cc(O)c(O)cc2s1)C(c1ccccc1)c1ccccc1
CHEMBL4778905	Cc1ccc(NC(=O)c2nccnc2C(=O)Nc2ccccc2-c2cc(C)n[nH]2)cc1		CHEMBL4204807	O=C(c1c[nH]c2ccccc12)C(Nc1cc(F)cc(F)c1)c1ccccc1		CHEMBL4864689	COc1cc2nc(NC(=O)C(c3ccccc3)c3ccccc3)sc2cc1OC
CHEMBL4742664	Cc1cc(-c2ccccc2NC(=O)c2nccnc2C(=O)Nc2ccc(F)cc2)[nH]n1		CHEMBL4561278	O=C(Nc1c[nH]c2ncc(-c3ccc(C(F)(F)F)cc3)cc12)c1cccnc1		CHEMBL4855284	N/C(=N\O)c1cccc(-c2ccc3c(c2)c2cc(-c4cccc(/C(N)=N/O)c4)ccc2n3S(=O)(=O)c2cccc(F)c2)c1
CHEMBL4641308	O=c1c(-c2ccccc2)ccc2sc3ccc(OC4CCCCC4)cc3n12		CHEMBL4475520	COc1ccc(-c2cnc3[nH]cc(NC(=O)C4CCCC4)c3c2)cc1OC		CHEMBL4875659	COc1ccc(Br)cc1S(=O)(=O)n1c2ccc(-c3cccc(/C(N)=N/O)c3)cc2c2cc(-c3cccc(/C(N)=N/O)c3)ccc21
CHEMBL1269067	COC[C@H]1O[C@@H](n2ccc3c(C)ncnc32)[C@H](O)[C@@H]1O		CHEMBL4206820	COc1ccnc(NC(C(=O)c2c[nH]c3ccccc23)c2ccccc2)c1		CHEMBL4875560	NC(=O)c1cccc(NC(=O)[C@@H](NC(=O)c2ccc(-c3ccco3)cc2)c2ccc(OCc3ccccc3)cc2)c1
CHEMBL176599	O=C(O)c1cnc2c([N+](=O)[O-])cccc2c1O		CHEMBL4208984	COc1cc(NC(C(=O)c2c[nH]c3cccc(CO)c23)c2ccccc2)cc(OC)c1		CHEMBL4762694	COc1cc(-c2cnc3c(-c4cccc(NC(=O)C(C)C)c4)snc3c2)ccc1N
CHEMBL599409	CCN(CC)c1ccc(/C=N\Nc2ccc(Cl)c(C(=O)O)c2)c(O)c1		CHEMBL4277579	CN(C)CCCCC(=O)Nc1ccc(CN2N=C(c3ccc(F)cc3)C3C=CC=CC3C2=O)cc1		CHEMBL4755134	COc1cc(-c2cnc3c(N4CCCC(CNC(=O)C5CCCC5)C4)snc3c2)ccc1N
CHEMBL3426548	O=C1C[C@]2(C(=O)Nc3ccc(Cl)cc32)c2cnn(Cc3ccc(C(F)(F)F)cc3)c2N1		CHEMBL2440322	CCCC[C@H](NC(=O)[C@H](CCCCN)NC(=O)[C@H](CCCNC(=N)N)NC(=O)c1ccc(/C=C2\SC(=S)N(CCCC)C2=O)cc1)C(N)=O		CHEMBL4784439	COc1cc(-c2cnc3c(N4CCCC(CNC(=O)N5CCCC5)C4)snc3c2)ccc1N
CHEMBL3426543	O=C1C[C@]2(C(=O)Nc3ccc(Cl)cc32)c2cnn(Cc3ccc(Cl)cc3)c2N1		CHEMBL2440332	CCCC[C@H](NC(=O)[C@H](CCCCN)NC(=O)[C@H](CCCNC(=N)N)NC(=O)c1cccc(/C=C2\SC(=O)N(C3CCCC3)C2=O)c1)C(N)=O		CHEMBL4778276	COc1cc(-c2cnc3c(-c4cccc(NC(=O)N5CCOCC5)c4)snc3c2)ccc1N
CHEMBL1514645	NS(=O)(=O)c1ccc(N2N=C(c3ccccc3)CC2c2ccccc2Cl)cc1		CHEMBL3735922	CC(C)(CCCOc1ccc(-n2nc3ccc(Cl)cc3n2)cc1)C(=O)O		CHEMBL4747954	Cc1ccc(NC(=O)c2ccccc2NC(=O)c2ccc(F)cc2)c(-c2ccncc2)c1
CHEMBL1591211	NS(=O)(=O)c1ccc(N2N=C(c3ccccc3)CC2c2cccc(Cl)c2)cc1		CHEMBL4099877	N=C(N)NCCC[C@@H]1NC(=O)[C@H](CCCNC(=N)N)NC(=O)[C@@H](CCCNC(=N)N)NC(=O)[C@@H](Cc2ccc3ccccc3c2)NC(=O)[C@H](Cc2ccccc2)NC(=O)[C@H](CCc2ccccc2)NC(=O)[C@@H](Cc2ccc3ccccc3c2)NC(=O)[C@H](CCCCN)NC1=O		CHEMBL4789833	CC1(C)CC(=O)C2=C(C1)N(c1ccccc1)C(c1ccc(C#N)cc1)N(c1ccccc1)C2
CHEMBL4170341	NS(=O)(=O)c1ccc(N2N=C(c3ccc(Oc4ccccc4)cc3)CC2c2ccccc2Cl)cc1		CHEMBL4081688	CSc1cccc(N2C(=O)c3cc4ccc(C(F)(F)F)cc4n3C[C@@]2(C)C(=O)NC2CCCC2)c1		CHEMBL4800172	CC1(C)CC(=O)C2=C(C1)N(c1ccc(-c3ccccc3)cc1)C(c1ccc(Br)cc1)N(c1ccc(Cl)cc1)C2
CHEMBL3234972	COc1ccc(-c2cc3cc(OC)ccc3nc2C(=O)c2ccccc2)cc1		CHEMBL4069770	CSc1cccc(N2C(=O)CN(c3ccc(C(F)(F)F)cc3)CC2C(=O)NC2CCCC2)c1		CHEMBL4281239	Cc1ncnc2c1c1cc(Cl)ccc1n2[C@@H]1O[C@H](CO)[C@@H](O)[C@@H]1O
CHEMBL3234974	O=C(c1ccccc1)c1nc2ccccc2cc1-c1ccc(F)cc1		CHEMBL4547557	COc1ccc(S(=O)(=O)N(CCCC(=O)C2CCCCCC2)c2ccc3c(c2)CCCC3)cc1		CHEMBL4446364	COc1cccc(Cn2c3ccc(-c4cccc(C(=N)N)c4)cc3c3cc(-c4cccc(C(=N)N)c4)ccc32)c1
CHEMBL4641383	CCCCCCCC(=O)N[C@H](C(=O)NCc1ccc(NC(=N)N)cc1)c1ccc(OCc2ccccc2)cc1.O=C(O)C(F)(F)F		CHEMBL4591644	Clc1ccc(/C=N/Nc2ccnc(NCCN3CCOCC3)n2)c(Cl)c1		CHEMBL4853295	COc1ccc(S(=O)(=O)n2c3ccc(-c4cccc(/C(N)=N/O)c4)cc3c3cc(-c4cccc(/C(N)=N/O)c4)ccc32)cc1
CHEMBL4164614	NS(=O)(=O)c1ccc(N2N=C(c3ccc(OCc4ccccc4)cc3)CC2c2ccccc2F)cc1		CHEMBL4061103	CSc1cccc(NC(=O)c2cc3ccc(C(F)(F)F)cc3n2CC(C)C(=O)NC2CCCC2)c1		CHEMBL4859110	CCn1c2ccc(-c3cccc(/C(N)=N/O)c3)cc2c2cc(-c3cccc(/C(N)=N/O)c3)ccc21
CHEMBL4165746	NS(=O)(=O)c1ccc(N2N=C(c3ccc(OCc4ccccc4)cc3)CC2c2ccccc2Cl)cc1		CHEMBL3426586	CN1C(=O)C2(CC(=O)Nc3c2cnn3Cc2ccc(Cl)cc2)c2cc(Cl)ccc21		CHEMBL4850523	N/C(=N\O)c1cccc(-c2ccc3c(c2)c2cc(-c4cccc(/C(N)=N/O)c4)ccc2n3S(=O)(=O)c2cccc(Cl)c2)c1
CHEMBL4129286	CC(C)OC(=O)[C@H](C)N[P@](=O)(OC[C@@]1(F)O[C@@H](n2ccc(=O)[nH]c2=O)[C@](C)(O)[C@@H]1O)Oc1ccccc1		CHEMBL3764674	Brc1cccc(-c2nnc(/C=C/c3ccc(Br)s3)o2)c1		CHEMBL4849711	COc1ccc(OC)c(S(=O)(=O)n2c3ccc(-c4cccc(/C(N)=N/O)c4)cc3c3cc(-c4cccc(/C(N)=N/O)c4)ccc32)c1
CHEMBL4783191	CC1(C)CC(=O)C2=C(C1)N(c1ccccc1)C(c1ccc(Br)cc1)N(c1ccccc1Cl)C2		CHEMBL3629297	CCOC(=O)[C@H](C)NP(=O)(OC[C@@]1(C)O[C@@H](n2ccc3c(-c4cccs4)ncnc32)[C@H](O)[C@@H]1O)Oc1ccccc1		CHEMBL4860341	COc1ccc(S(=O)(=O)n2c3ccc(-c4cccc(/C(N)=N/O)c4)cc3c3cc(-c4cccc(/C(N)=N/O)c4)ccc32)cc1F
CHEMBL4175819	COc1ccc(-c2cc(-c3ccc4cc(F)ccc4n3)nn2-c2ccccc2)cc1		CHEMBL4476860	COc1ccc(S(=O)(=O)N(CCCC(=O)C2CCCCC2)c2ccccc2)cc1		CHEMBL4873069	N/C(=N\O)c1cccc(-c2ccc3c(c2)c2cc(-c4cccc(/C(N)=N/O)c4)ccc2n3Cc2ccc(F)cc2)c1
CHEMBL4159974	NS(=O)(=O)c1ccc(-n2nc(-c3ccccc3)cc2-c2ccc3cc(F)ccc3n2)cc1		CHEMBL4777132	COc1cc(C2N(c3ccccc3)CC3=C(CC(C)(C)CC3=O)N2c2ccccc2)cc(OC)c1O		CHEMBL4864785	N/C(=N\O)c1cccc(-c2ccc3c(c2)c2cc(-c4cccc(/C(N)=N/O)c4)ccc2n3Cc2ccc(Br)c(F)c2)c1
CHEMBL4160320	COc1ccc(-c2cc(-c3ccc4cc(F)ccc4n3)n(-c3ccc(OC)cc3)n2)cc1		CHEMBL4781459	CC1(C)CC(=O)C2=C(C1)N(c1ccccc1)C(c1ccccc1Br)N(c1ccccc1)C2		CHEMBL4849323	N/C(=N\O)c1cccc(-c2ccc3c(c2)c2cc(-c4cccc(/C(N)=N/O)c4)ccc2n3CC(O)COc2ccccn2)c1
CHEMBL3401560	Oc1ccc(C2=NN(c3nc(-c4ccc(-c5ccccc5)cc4)cs3)C(c3ccccc3)C2)cc1		CHEMBL4790547	Cc1ccc(C2N(c3ccccc3)CC3=C(CC(C)(C)CC3=O)N2c2ccccc2)s1		CHEMBL4752286	COc1cc(-c2cnc3c(N4CCCC(CNC(=O)c5ccccc5)C4)snc3c2)ccc1N
CHEMBL4642620	COc1cc(-c2cnc3c(N4C[C@H](C)O[C@H](C)C4)snc3c2)cc(OC)c1OC		CHEMBL4476539	CSc1ncnc2c1c1ccn(C)c1n2[C@@H]1O[C@H](CO)[C@@H](O)[C@H]1O		CHEMBL4871800	COc1cc(Nc2nc(NCCOc3ccccc3)nc3[nH]cnc23)cc(OC)c1OC
CHEMBL3426588	CN1C(=O)[C@@]2(CC(=O)Nc3c2cnn3Cc2ccc(Cl)cc2)c2cc(Cl)ccc21		CHEMBL4098453	C=CC(=O)Nc1cc(-n2c(=O)ccc3cnc4ccc(-c5cnn(C)c5)cc4c32)ccc1C		CHEMBL4874769	NC(=O)c1ccc(CNC(=O)[C@@H](NC(=O)c2ccc(Oc3ccccc3)cc2)c2ccc(OCc3ccccc3)cc2)cc1
CHEMBL3426577	O=C1C[C@@]2(C(=O)Nc3ccc(Cl)cc32)c2cnn(Cc3ccc(Cl)cn3)c2N1		CHEMBL4059522	C=CC(=O)Nc1cc(-n2c3c(ccc2=O)CCc2ccc(-c4ccc5ccncc5c4)cc2-3)ccc1C		CHEMBL4538527	C#Cc1c(C#N)ncn1[C@@H]1[Se][C@H](CO)[C@@H](O)[C@H]1O
CHEMBL3426549	O=C1C[C@@]2(C(=O)Nc3ccc(Cl)cc32)c2cnn(Cc3ccc(C(F)(F)F)cc3)c2N1		CHEMBL4454368	COc1ccc(CN2Cc3c(Nc4cccc(O)c4)nc(N4CCOCC4)nc3C2=O)cc1		CHEMBL4469088	C#Cc1c(C#N)ncn1[C@@H]1S[C@H](CO)[C@@H](O)[C@H]1O
CHEMBL3426593	O=C1C[C@@]2(C(=O)Nc3ccc(Cl)cc32)c2cnn(Cc3ccc(Cl)cc3)c2N1		CHEMBL477382	C=C1C(=O)OC(CCCCCCCC)C1C(=O)O		CHEMBL4459190	C#Cc1c(C(N)=O)ncn1[C@@H]1S[C@H](CO)[C@@H](O)[C@H]1O
CHEMBL597978	COc1ccc(/C=C2/CN(CCCC(=O)O)C(=O)C2=O)cc1		CHEMBL1789789	Cc1cc(NCCCN(C)C)c2ccc3c(ccc4c(NCCCN(C)C)cc(C)nc43)c2n1		CHEMBL4280999	CC1=C(I)C(C)=[N+]2C1C(c1cc[n+](C)cc1)c1c(C)c(I)c(C)n1[B-]2(F)F
CHEMBL330407	COc1ccc(/C=C\c2cc(OC)c(OC)c(OC)c2)cc1N		CHEMBL4443342	COc1cc(Nc2ccnc3ccc(Br)cc23)cc(OC)c1OC		CHEMBL327134	CC[C@H]1CN2CCc3c([nH]c4ccccc34)[C@H]2C[C@@H]1/C(=C\OC)C(=O)OC
CHEMBL4518162	COc1ccc(/C=C\c2cc(OC)c(OC)c(OC)c2)cc1NC(=O)[C@H](CO)NC(=O)[C@H](CCCNC(=N)N)NC(=O)[C@H](CCCNC(=N)N)NC(=O)c1ccccc1		CHEMBL4794323	COc1cc(-c2cnc3c(-c4cccc(NC(=O)C5CC5)c4)snc3c2)ccc1N		CHEMBL202885	O=C(c1ccccc1)N1N=C(c2cccs2)CC1c1ccc(Cl)cc1
CHEMBL4083802	Cc1ccc(Nc2nc(Cl)nc3ccccc23)c(-c2cc(C)n[nH]2)c1		CHEMBL4777772	COc1cc(Nc2c(C#N)cnc3cc(I)ccc23)cc(OC)c1OC		CHEMBL4531195	C#Cc1c(C(N)=O)ncn1[C@@H]1[Se][C@H](CO)[C@@H](O)[C@H]1O
CHEMBL4442812	COc1ccc(-c2cnc3[nH]cc(C#Cc4cccnc4)c3n2)cc1OC		CHEMBL3794454	C[C@H](O)[C@H]1CC[C@@]2(O)C3=CC(=O)[C@@H]4C[C@@H](O)[C@@H](O)C[C@]4(C)[C@H]3CC[C@]12C		CHEMBL4533598	O=C(Nc1cccs1)c1ccccc1Sc1ccc([N+](=O)[O-])cc1
CHEMBL4454007	COc1cccc(C#Cc2c[nH]c3ncc(-c4ccc(OC)c(OC)c4)cc23)c1		CHEMBL4753168	Cc1ccc(NC(=O)c2ccccc2C(=O)Nc2ccc(C)cc2-c2cc(C)n[nH]2)cc1		CHEMBL478802	O=C1N[C@H]2C=C[C@@H](O)[C@H](O)[C@@H]2c2cc3c(cc21)OCO3
CHEMBL4173795	NS(=O)(=O)c1ccc(N2N=C(c3ccc(Oc4ccccc4)cc3)CC2c2ccc(Cl)cc2)cc1		CHEMBL4205295	COc1cccc(NC(C(=O)c2c[nH]c3ccccc23)c2ccccc2)c1		CHEMBL2107375	Cl.N=C(N)c1ncn([C@@H]2O[C@H](CO)[C@@H](O)[C@H]2O)n1
CHEMBL4128325	CC#C[C@@]1(O)[C@H](O)[C@@](F)(CO[P@@](=O)(N[C@@H](C)C(=O)OC(C)C)Oc2ccccc2)O[C@H]1n1ccc(=O)[nH]c1=O		CHEMBL4205724	COc1cncc(NC(C(=O)c2c[nH]c3ccccc23)c2ccccc2)c1		CHEMBL476487	O=c1[nH]c2c(c3cc4c(cc13)OCO4)C[C@H](O)[C@@H](O)[C@H]2O
CHEMBL4278874	Nc1ncnc2c1c1cc(Cl)ccc1n2[C@@H]1O[C@H](CO)[C@@H](O)[C@@H]1F		CHEMBL4203720	COc1cccc(NC(C(=O)c2c[nH]c3ccccc23)c2nc3ccccc3o2)c1		CHEMBL490147	CC(=O)O[C@H]1C=C2c3cc4c(cc3C(=O)N[C@H]2[C@H](OC(C)=O)[C@@H]1OC(C)=O)OCO4
CHEMBL4174301	C[C@@]1(O)[C@H](O)[C@@H](COP(=O)(O)NCCc2c[nH]c3ccccc23)O[C@H]1n1cnc2c(=O)[nH]c(N)nc21		CHEMBL4471097	COC(=O)CC[C@H](NC(=O)[C@H]1O[C@H](O[C@H]2CC[C@@]3(C)[C@@H](CC[C@]4(C)[C@@H]3C(=O)C=C3[C@@H]5C[C@@](C)(C(=O)N[C@@H](CCC(=O)OC)C(=O)OC)CC[C@]5(C)CC[C@]34C)C2(C)C)[C@H](O[C@@H]2O[C@H](C(=O)N[C@@H](CCC(=O)OC)C(=O)OC)[C@@H](O)[C@H](O)[C@H]2O)[C@@H](O)[C@@H]1O)C(=O)OC		CHEMBL419335	O=C1N[C@H]2[C@H](O)[C@H](O)[C@@H](O)[C@H](O)[C@@H]2c2cc3c(c(O)c21)OCO3
CHEMBL1685067	COc1cc2c(c(O)c1C)C(=O)CC(c1ccccc1)O2		CHEMBL4637516	CC(=O)CCc1cn(-c2ccc(NC(=O)Nc3cccc(F)c3)cc2)nn1		CHEMBL98481	O=C1N[C@H]2[C@H](O)[C@H](O)[C@@H](O)[C@H](O)[C@@H]2c2cc3c(cc21)OCO3
CHEMBL19980	C[C@H]1CCC/C=C/[C@@H]2C[C@H](O)C[C@H]2[C@H](O)/C=C/C(=O)O1		CHEMBL3275868	O=C1C(=Cc2ccc(O)cc2)C(=O)c2ccccc21		CHEMBL478768	CC(=O)Oc1c2c(cc3c1C(=O)N[C@@H]1[C@H]3C[C@H](OC(C)=O)[C@@H](OC(C)=O)[C@H]1OC(C)=O)OCO2
CHEMBL682	CCN(CC)Cc1cc(Nc2ccnc3cc(Cl)ccc23)ccc1O		CHEMBL83598	O=C1C(=Cc2ccc(O)c(O)c2)C(=O)c2ccccc21		CHEMBL251056	O=C1N[C@H]2[C@H](O)[C@H](O)[C@@H](O)C[C@@H]2c2cc3c(cc21)OCO3
CHEMBL4750908	O=C(NCC1(C(=O)O)CC1)c1cc(-c2ccccc2)c(=O)n2c1sc1ccc(OC3CCCCC3)cc12		CHEMBL4471499	N#C/C(=N\Nc1cccc(Cl)c1)C(=O)c1ccco1		CHEMBL610118	N#C/N=C(/N)c1ncn(C2O[C@H](CO)[C@@H](O)[C@H]2O)n1
CHEMBL4640786	C/C(C#Cc1cc(O)ccc1O)=C/CC(=O)O		CHEMBL4440832	O=C(Nc1nc2cc(O)c(O)cc2s1)c1ccccc1Oc1ccc2cc(O)ccc2c1		CHEMBL513930	O=C1N[C@@H]2[C@@H](C[C@H](O)[C@@H](O)[C@H]2O)c2cc3c(cc21)OCO3
CHEMBL4637756	C=C(C#Cc1cc(O[C@@H]2O[C@@H](C)[C@H](O)[C@@H](O)[C@H]2O)ccc1O)CC/C=C(\C)CCC=C(C)C		CHEMBL1064	CCC(C)(C)C(=O)O[C@H]1C[C@@H](C)C=C2C=C[C@H](C)[C@H](CC[C@@H]3C[C@@H](O)CC(=O)O3)[C@H]21		CHEMBL476486	O=c1[nH]c2c(c3cc4c(c(O)c13)OCO4)C[C@H](O)[C@@H](O)[C@H]2O
CHEMBL522273	CO[C@@H]1CC[C@]2(C)OC[C@H](C)C3C[C@@H](C)[C@@H](OC(C)=O)[C@H]4C(C[C@H]1C)OC2[C@@H]34		CHEMBL4448694	C=CCn1c2ccccc2c(=O)c2ccc(Cl)cc21		CHEMBL586091	COc1cc2c(cc1O)[C@@H]1[C@H](O)[C@@H](O)C=C3CCN(C2)[C@H]31
CHEMBL517959	CC(=O)O[C@@H]1[C@H](C)CC2[C@@H]3C4OC(/C=C(/C)[C@H](O)CC[C@]4(C)OC[C@@H]2C)[C@@H]31		CHEMBL4538599	C=CCn1c2ccc(Cl)cc2c(=O)c2cccc(OC)c21		CHEMBL463048	O=C1N[C@@H]2[C@@H](C[C@H](O)[C@@H](O)[C@H]2O)c2cc3c(c(O)c21)OCO3
CHEMBL3234975	O=C(c1ccccc1)c1nc2ccc(F)cc2cc1-c1ccc(F)cc1		CHEMBL4444527	COc1ccc(-c2cnc3[nH]cc(NC(=O)c4ccccc4)c3c2)cc1OC		CHEMBL606758	CO[C@@H]1C=C[C@@]23c4cc5c(cc4C(O)O[C@H]2CN(C)[C@H]3C1)OCO5
CHEMBL506569	CC(=O)O[C@H]1C[C@H](O[C@H]2[C@@H](O)C[C@H](O[C@H]3[C@@H](O)C[C@H](O[C@H]4CC[C@]5(C)[C@H]6C[C@@H](O)[C@]7(C)[C@@H](C8=CC(=O)OC8)CC[C@]7(O)[C@@H]6CC[C@@H]5C4)O[C@@H]3C)O[C@@H]2C)O[C@H](C)[C@H]1O[C@@H]1O[C@H](CO)[C@@H](O)[C@H](O)[C@H]1O		CHEMBL4281487	Cc1ncnc2c1c1cc(Cl)ccc1n2[C@@H]1O[C@H](CO)[C@@H](O)[C@@H]1F		CHEMBL487798	O=C1N[C@@H]2C(=C[C@H](O)[C@@H](O)[C@H]2O)c2cc3c(cc21)OCO3
CHEMBL584	Cc1c(O)cccc1C(=O)N[C@@H](CSc1ccccc1)[C@H](O)CN1C[C@H]2CCCC[C@H]2C[C@H]1C(=O)NC(C)(C)C		CHEMBL4445477	COc1ccc(S(=O)(=O)NCCCC(=O)c2ccc(F)cc2)cc1		CHEMBL98745	O=C1N[C@@H]2C(=C[C@H](O)[C@@H](O)[C@H]2O)c2cc3c(c(O)c21)OCO3
CHEMBL115145	O=C(O)c1cc(Cc2ccc(O)c(C(=O)O)c2)ccc1O		CHEMBL4643269	O=C1CC2(C(=O)Nc3ccc(Cl)cc32)c2cn(Cc3ccc(Cl)c(Cl)c3)nc2N1		CHEMBL464432	O=C1N[C@H]2[C@H](O)[C@H](O)[C@@H](O)C[C@@H]2c2cc3c(c(O)c21)OCO3
CHEMBL599013	O=C(O)c1ccccc1/C=N/NC(=O)c1cc(-c2ccco2)nc2ccccc12		CHEMBL4649364	CS(=O)(=O)c1ccc(Cn2ncc3c2NC(=O)CC32C(=O)Nc3ccc(Cl)cc32)cc1		CHEMBL516095	O=C1N[C@H]2CC=C[C@H](O)[C@@H]2c2cc3c(cc21)OCO3
CHEMBL3234978	COc1ccc(C(=O)c2nc3ccccc3cc2-c2ccc(OC)cc2)cc1		CHEMBL1173298	NS(=O)(=O)c1ccc(Nc2nc(N3CCN(CCO)CC3)nc3[nH]cnc23)cc1		CHEMBL476703	CC(=O)O[C@@H]1[C@@H](O)[C@@H](O)[C@@H]2NC(=O)c3cc4c(cc3[C@H]2[C@H]1O)OCO4
CHEMBL2440346	CCCC[C@H](NC(=O)[C@H](CCCCN)NC(=O)[C@H](CCCNC(=N)N)NC(=O)c1ccc(/C=C2\SC(=O)N(Cc3ccc(Cl)cc3)C2=O)cc1)C(N)=O		CHEMBL4447800	Cc1ccc2nc(-c3ccc4nc(-c5ccc(NC(=O)c6ccc7nc(-c8ccc(N)cc8)sc7c6)cc5)sc4c3)sc2c1S(=O)(=O)O.N		CHEMBL478801	O=C1N[C@H]2C[C@@H](O)[C@@H](O)[C@H](O)[C@@H]2c2cc3c(cc21)OCO3
CHEMBL98778	C#C[C@@]1(O)[C@H](O)[C@@H](CO)O[C@H]1n1ccc(N)nc1=O		CHEMBL2110737	CCCC(=O)O[C@H]1CN2CC[C@H](O)[C@@H]2[C@@H](O)[C@@H]1O		CHEMBL517360	O=C1N[C@H]2C=C[C@@H](O)[C@H](OC3CCCCO3)[C@@H]2c2cc3c(cc21)OCO3
CHEMBL3628485	N=C(N)Nc1ccc(C[C@H](NC(=O)CCc2ccccc2)C(=O)N[C@@H](CCCCN)C(=O)N[C@H](C(N)=O)c2ccccc2)cc1		CHEMBL4534211	COCCCCCCCCCN1C[C@H](O)[C@@H](O)[C@H](O)[C@H]1CO		CHEMBL478100	CC(=O)O[C@@H]1[C@@H](OC(C)=O)[C@H](O)[C@@H]2c3cc4c(cc3C(=O)N[C@H]2[C@@H]1OC(C)=O)OCO4
CHEMBL4475125	COc1ccc(/C=C\c2cc(OC)c(OC)c(OC)c2)cc1NC(=O)CN		CHEMBL4169590	Cc1ccccc1C1CC(c2ccc(OCc3ccccc3)cc2)=NN1c1ccc(S(N)(=O)=O)cc1		CHEMBL516115	CC(=O)O[C@H]1[C@@H](OC(C)=O)[C@@H]2NC(=O)c3cc4c(cc3[C@H]2[C@@H](OC(C)=O)[C@@H]1OC(C)=O)OCO4
CHEMBL1797866	CC(C)(C)NC(=O)C(=O)CCc1ccccc1		CHEMBL1194235	COc1cc(Nc2ncnc3ccc(Cl)cc23)cc(OC)c1OC		CHEMBL3143954	C/N=C(\NC)c1ncn([C@@H]2O[C@H](CO)[C@@H](O)[C@H]2O)n1.Cl
						CHEMBL400748	COC(=N)c1ncn([C@@H]2O[C@H](CO)[C@@H](O)[C@H]2O)n1
